# Supplementary material for: Chalcogenative spirocyclization of N-aryl propiolamides with diselenides/disulfides promoted by Selectfluor
Source: publisher site journal article supplement (doi:10.1515/znb-2021-0154), 2021-12-03
Supplement: Supplementary file 1 [file j_znb-2021-0154_suppl.docx]

Supporting Information

**Chalcogenative Spirocyclization of *N*-Aryl Propiolamides with Diselenides/Disulfides Promoted by Selectfluor**

Jinwei Yuan,a,* Guangchao Huang,a Lili Wang,a Xinyuan Wang,a Liangru Yang,a,* Yongmei Xiao,a Pu Maoa, Shouren Zhang,b,* Lingbo Quc

a School of Chemistry & Chemical Engineering, Henan University of Technology, Zhengzhou 450001, P. R. China

b Henan Key Laboratory of Nanocomposites and Applications; Institute of Nanostructured Functional Materials, Huanghe Science and Technology College, Zhengzhou 450006, P. R. China

c College of Chemistry, Zhengzhou University, Zhengzhou 450001, P. R. China

***Corresponding authors:**

**E-mail:** [yuanjinweigs@126.com](mailto:yuanjinweigs@126.com) (Jin-Wei Yuan)

Contents

[1. General experimental information 1](#_Toc82610269)

[2. Optimization of reaction conditions 2](#_Toc82610270)

[3. Synthesis and characterization of the desired products 3](#_Toc82610271)

[4. Copies of spectra of products 15](#_Toc82610272)

[5. Intermolecular competition experiment 54](#_Toc82610273)

# 1. General experimental information

All chemicals were commercially available and used as received without further purification. Column chromatography was performed using 300-400 mesh silica. Nuclear magnetic resonance spectra were recorded on Bruker Avance 400 MHz spectrometer. 1H NMR spectra were recorded in ppm from tetramethylsilane. Data were reported as follows: chemical shift, multiplicity (s = singlet, d = doublet, t = triplet, m = multiplet and br = broad), coupling constant in Hz and integration. 13C NMR spectra were recorded in ppm from tetramethylsilane. 19F NMR spectra were recorded in ppm with fluorobenzene as external standard. High resolution mass spectra (HR MS) were obtained on Thermo Scientific LTQ Orbitrap XL instrument using the ESI technique. IR spectra were recorded on WQF-510 Fourier transform infrared spectrophotometer. Melting points were determined on an XT4A microscopic apparatus and are uncorrected.

# 2. Optimization of reaction conditions

**Table S1** Screening the amount of **1a** and **2a**a

| Entry | The molar amount of  **1a** and **2a** | Yields (%)b |
| --- | --- | --- |
| 1 | 1:0.3 | 41 |
| 2 | 1:0.5 | 69 |
| 3 | 1:1.0 | 80 |
| 4 | 1:1.5 | 80 |

[a] Reaction conditions: *N*-(4-methoxyphenyl)-*N*-methyl-3-phenylpropiolamide **1a** (0.2 mmol, 53.0 mg), diphenyl diselenide **2a**, Selectfluor agent (0.2 mmol, 66.0 mg), in CH3CN (2.0 mL) at 40 oC for 1.5 h.

[b] Isolated yield.

# 3. Synthesis and characterization of the desired products

**General experimental procedure for the synthesis of 3-arylselenenyl azaspiro[4,5]trienones (3)**

*N*-Aryl alkynamides **1** (0.2 mmol), diaryldiselenide **2** (0.2 mmol), Selectfluor agent (0.2 mmol, 70.8 mg), and acetonitrile (2.0 mL) were added to a 10 mL reaction tube. The mixture was stirred at 40 oC for 1.5 h. After completion of the reaction, the solvent was distilled under vacuum. Then, the resulting mixture was dissolved with ethyl acetate (15 mL), washed with saturated sodium chloride solution (10 mL × 2). The organic phase was dried over anhydrous Na2SO4 and concentrated under vacuum. The residue was purified by silica gel column chromatography to give 3-arylselenenyl azaspiro[4,5]trienones **3** using ethyl acetate/[dichloromethane](javascript:;) as eluant.

***4-(3,4-Dimethylphenyl)-1-methyl-3-(phenylselanyl)-1-azaspiro[4.5]deca-3,6,9-triene-2,8-dione* (3c)**

Orange crystal; yield: 73.9 mg (85%); m.p. 131-132 oC. − IR (KBr): *ν* = 2922, 1687, 1660, 1623, 1384, 863 cm-1. − 1H NMR (400 MHz, CDCl3): *δ* = 7.38 (d, *J*H-H = 7.6 Hz, 2H), 7.18-7.09 (m, 3H), 6.95 (d, *J*H-H = 7.8 Hz, 1H), 6.87 (d, *J*H-H = 7.9 Hz, 1H), 6.83 (s, 1H), 6.50 (d, *J*H-H = 10.0 Hz, 2H), 6.43 (d, *J*H-H = 10.0 Hz, 2H), 2.88 (s, 3H), 2.17 (s, 3H), 2.11 (s, 3H). − 13C NMR (100 MHz, CDCl3): *δ* = 184.1 (C=O), 168.9 (C=O), 154.6, 145.3 (CH), 138.3, 136.3, 133.6 (CH), 132.9 (CH), 129.4 (CH), 129.3 (CH), 129.1, 128.8 (CH), 128.6, 127.6 (CH), 127.4, 125.2 (CH), 68.9, 26.3 (CH3), 19.7 (CH3), 19.6 (CH3). − HR MS ((+)ESI): *m/z* = 436.0806 (calcd. 436.0810 for C24H22NO2Se [M + H]+).

***4-(4-Methoxyphenyl)-1-methyl-3-(phenylselanyl)-1-azaspiro[4.5]deca-3,6,9-triene-2,8-dione* (3d)**

Pale yellow crystal; yield: 75.2 mg (86%); m.p. 173-174 oC. − IR (KBr): *ν* = 2954, 1693, 1667, 1625, 1606, 1508, 1359, 1258, 1180, 877 cm-1. − 1H NMR (400 MHz, CDCl3): *δ* = 7.34 (d, *J*H-H = 6.9 Hz, 2H), 7.13-7.07 (m, 5H), 6.68 (d, *J*H-H = 8.7 Hz, 2H), 6.48 (d, *J*H-H = 10.2 Hz, 2H), 6.41 (d, *J*H-H = 10.2 Hz, 2H), 3.70 (s, 3H), 2.84 (s, 3H). − 13C NMR (100 MHz, CDCl3): *δ* = 184.0 (C=O), 168.9 (C=O), 160.4, 154.4, 145.4 (CH), 133.3 (CH), 132.9 (CH), 129.5 (CH), 129.0 (CH), 128.4, 127.7 (CH), 123.5, 113.6 (CH), 68.8, 55.2 (CH3), 26.3 (CH3). − HR MS ((+)ESI): *m/z* = 438.0596 (calcd. 438.0603 for C23H20NO3Se [M + H]+).

***4-(4-Fluorophenyl)-1-methyl-3-(phenylselanyl)-1-azaspiro[4.5] deca-3,6,9-triene-2,8-dione* (3e)**2

Pale yellow crystal; yield: 60.3 mg (71%); m.p. 140-141 oC. − IR (KBr): *ν* = 2919, 1688, 1665, 1626, 1500, 1386, 1231, 876 cm-1. − 1H NMR (400 MHz, CDCl3): *δ* = 7.29 (d, *J*H-H = 7.7 Hz, 2H), 7.11 (t, *J*H-H = 7.1 Hz, 1H), 7.06-7.7.02 (m, 4H), 6.78 (t, *J*H-H = 8.6 Hz, 2H), 6.49 (d, *J*H-H = 10.0 Hz, 2H), 6.38 (d, *J*H-H = 10.0 Hz, 2H), 2.85 (s, 3H). − 13C NMR (100 MHz, CDCl3): *δ* = 183.7 (C=O), 168.5 (C=O), 162.9 (d, *J*P-C = 248.7 Hz), 152.4, 144.9, 133.5 (d, *J*P-C = 72.8 Hz), 130.6, 130.1, 130.0, 129.0, 127.9, 127.1, 126.9 (d, *J*P-C = 30.6 Hz), 115.2 (d, *J*P-C = 21.7 Hz), 69.1, 26.4 (CH3). − 19F NMR (376 MHz, CDCl3): *δ* = -110.8. − HR MS ((+)ESI): *m/z* = 426.0396 (calcd. 426.0403 for C22H17FNO2Se [M + H]+).

***4-(4-Chlorophenyl)-1-methyl-3-(phenylselanyl)-1-azaspiro[4.5] deca-3,6,9-triene-2,8-dione* (3f)**2

Pale yellow crystal; yield: 67.0 mg (76%); m.p. 164-165 oC. − IR (KBr): *ν* = 1688, 1665, 1387, 986 cm-1. − 1H NMR (400 MHz, CDCl3): *δ* = 7.32 (d, *J*H-H = 7.0 Hz, 2H), 7.18-7.15 (m, 1H), 7.10-7.06 (m, 4H), 7.00 (dd, *J*H-H = 8.8, 2.2 Hz, 2H), 6.52 (d, *J*H-H = 10.3 Hz, 2H), 6.42 (d, *J*H-H = 10.3 Hz, 2H), 2.89 (s, 3H). − 13C NMR (100 MHz, CDCl3): *δ* = 183.7 (C=O), 168.5 (C=O), 151.9, 144.8 (CH), 135.3, 134.0 (CH), 133.2 (CH), 131.0, 129.5, 129.4 (CH), 129.0 (CH), 128.3 (CH), 128.0 (CH), 126.5, 69.1, 26.4 (CH3). − HR MS ((+)ESI): *m/z* = 442.0100 (calcd. 442.0108 for C22H17ClNO2Se [M + H]+).

***4-(4-Bromophenyl)-1-methyl-3-(phenylselanyl)-1-azaspiro[4.5] deca-3,6,9-triene-2,8-dione* (3g)**2

Pale yeloow crystal; yield: 74.7 mg (77%); m.p. 159-160 oC. − IR (KBr): *ν* = 2920, 1691, 1666, 1626, 1480, 1418, 1386, 1062, 872 cm-1. − 1H NMR (400 MHz, CDCl3): *δ* = 7.33 (dd, *J*H-H = 7.9, 0.9 Hz, 2H), 7.27-7.24 (m, 2H), 7.20-7.16 (m, 1H), 7.09 (t, *J*H-H = 7.6 Hz, 2H), 6.91 (d, *J*H-H = 8.6 Hz, 2H), 6.49 (d, *J*H-H = 10.2 Hz, 2H), 6.42 (d, *J*H-H = 10.2 Hz, 2H), 2.90 (s, 3H). − 13C NMR (100 MHz, CDCl3): *δ* = 183.7 (C=O), 168.5 (C=O), 151.7, 144.7 (CH), 134.2, 133.2, 131.3, 131.2, 129.9, 129.6, 129.0, 128.1, 126.4, 123.7, 69.0, 26.4 (CH3). − HR MS ((+)ESI): *m/z* = 485.9595 (calcd. 485.9602 for C22H17BrNO2Se [M + H]+).

***4-(4-iodophenyl)-1-methyl-3-(phenylselanyl)-1-azaspiro[4.5]deca-3,6,9-triene-2,8-dione* (3h)**2

Colorless crystal; yield: 87.4 mg (82%); m.p. 136-137 oC. − IR (KBr): *ν* = 2924, 1688, 1621, 1384, 873 cm-1. − 1H NMR (400 MHz, CDCl3): *δ* = 7.45 (d, *J*H-H = 8.4 Hz, 2H), 7.32 (d, *J*H-H = 7.2 Hz, 2H), 7.19 (t, *J*H-H = 7.4 Hz, 1H), 7.08 (t, *J*H-H = 7.4 Hz, 2H), 6.77 (d, *J*H-H = 8.4 Hz, 2H), 6.49 (d, *J*H-H = 10.1 Hz, 2H), 6.41 (d, *J*H-H = 10.1 Hz, 2H), 2.89 (s, 3H). − 13C NMR (100 MHz, CDCl3): *δ* = 183.7 (C=O), 168.5 (C=O), 151.8, 144.7 (CH), 137.2 (CH), 134.2 (CH), 133.2 (CH), 131.1, 130.4, 129.6 (CH), 129.1 (CH), 128.1 (CH), 126.4, 95.7, 69.0, 26.4 (CH3). − HR MS ((+)ESI): *m/z* = 533.9459 (calcd. 533.9464 for C22H17INO2Se [M + H]+).

***1-Methyl-4-(4-nitrophenyl)-3-(phenylselanyl)-1-azaspiro[4.5]deca-3,6,9-triene-2,8-dione* (3i)**2

Pale yellow crystal; yield: 50.6 mg (56%); m.p. 189-190 oC. − IR (KBr): *ν* = 1690, 1666, 1514, 1388, 1345, 987, 741 cm-1. − 1H NMR (400 MHz, CDCl3): *δ* = 7.92 (d, *J*H-H = 8.5 Hz, 2H), 7.30 (d, *J*H-H = 7.8 Hz, 2H), 7.17 (d, *J*H-H = 8.6 Hz, 2H), 7.12 (t, *J*H-H = 7.7 Hz, 1H), 7.02 (t, *J*H-H = 7.5 Hz, 2H), 6.55 (d, *J*H-H = 10.1 Hz, 2H), 6.44 (d, *J*H-H = 10.1 Hz, 2H), 2.94 (s, 3H). − 13C NMR (100 MHz, CDCl3): *δ* = 183.4 (C=O), 168.2 (C=O), 148.8, 147.6, 144.3 (CH), 137.4, 134.7 (CH), 133.6, 133.4 (CH), 129.2 (CH), 129.1 (CH), 128.4 (CH), 125.5, 123.1 (CH), 69.2, 26.5 (CH3). − HR MS ((+)ESI): *m/z* = 453.0343 (calcd. 453.0348 for C22H17N2O4Se [M + H]+).

***1-Methyl-4-(naphthalen-1-yl)-3-(phenylselanyl)-1-azaspiro[4.5] deca-3,6,9-triene-2,8-dione* (3j)**

Brown crystal; yield: 74.0 mg (81%); m.p. 186-187 oC (lit.1 127.2-129.8 oC). − IR (KBr): *ν* = 1685, 1666, 1623, 1378, 857 cm-1. − 1H NMR (400 MHz, CDCl3): *δ* = 7.69-7.67 (m, 1H), 7.58-7.55 (m, 2H), 7.44-7.41 (m, 2H), 7.09 (t, *J*H-H = 7.4 Hz, 1H), 6.94 (d, *J*H-H = 7.0 Hz, 2H), 6.90-6.85 (m, 2H), 6.71-6.67 (m, 3H), 6.50 (dd, *J*H-H = 10.0 Hz, *J*H-H = 1.6 Hz, 2H), 5.97 (dd, *J*H-H = 10.0 Hz, *J*H-H = 1.6 Hz, 1H), 2.97 (s, 3H). − 13C NMR (100 MHz, CDCl3): *δ* = 183.8 (C=O), 168.8 (C=O), 149.0, 144.8 (CH), 144.7 (CH), 135.0 (CH), 133.5 (CH), 133.2, 132.6 (CH), 130.2, 129.4 (CH), 128.7 (CH), 128.0 (CH), 127.5, 126.6 (CH), 126.0 (CH), 125.0 (CH), 124.1 (CH), 123.9, 70.8, 26.8 (CH3). − HR MS ((+)ESI): *m/z* = 458.0648 (calcd. 458.0654 for C26H20NO2Se [M + H]+).

***4-Ethyl-1-methyl-3-(phenylselanyl)-1-azaspiro[4.5]deca-3,6,9-triene-2,8-dione* (3k)**2

Pale yellow crystal; yield: 56.0 mg (78%); m.p. 86-87 oC. − IR (KBr): *ν* = 2920, 1712, 1698, 1658, 1624, 1417, 1364, 1013, 853 cm-1. − 1H NMR (400 MHz, CDCl3): *δ* = 7.54-7.51 (m, 2H), 7.26-7.25 (m, 3H), 6.54 (d, *J*H-H = 10.1 Hz, 2H), 6.39 (d, *J*H-H = 10.1 Hz, 2H), 2.85 (s, 3H), 2.20 (q, *J*H-H = 7.6 Hz, 2H), 1.00 (t, *J*H-H = 7.6 Hz, 3H). − 13C NMR (100 MHz, CDCl3): *δ* = 184.1 (C=O), 169.0 (C=O), 161.3 (CH), 145.3 (CH), 133.1 (CH), 132.8 (CH), 129.3 (CH), 128.4, 127.8, 127.7 (CH), 69.2, 26.6 (CH3), 20.9 (CH2), 14.1 (CH3). − HR MS ((+)ESI): *m/z* = 360.0490 (calcd. 360.0497 for C18H18NO2Se [M + H]+).

***1-Methyl-4-phenyl-3-(phenylselanyl)quinolin-2(1H)-one* (3l)**3

Pale yellow crystal; yield: 32.8 mg (42%); m.p. 160-163 oC. − IR (KBr): *ν* = 2971, 1637, 1598, 1575, 1438, 1045, 735 cm-1. − 1H NMR (400 MHz, CDCl3): *δ* = 7.53 (t, *J*H-H = 7.1 Hz, 1H), 7.39-7.35 (m, 4H), 7.27-7.23 (m, 2H), 7.15-7.04 (m, 7H), 3.79 (s, 3H). − 13C NMR (100 MHz, CDCl3): *δ* = 160.5, 155.0, 139.9, 138.0, 132.2 (CH), 131.7, 130.9 (CH), 128.8 (CH), 128.7 (CH), 128.2 (CH), 128.1 (CH), 126.7 (CH), 126.2, 122.0 (CH), 121.5, 114.2 (CH), 30.9 (CH3). − HR MS ((+)ESI): *m/z* = 414.0362 (calcd. 414.0368 for C22H17NOSeNa [M + Na]+).

***1-Methyl-4-phenyl-3-(o-tolylselanyl)-1-azaspiro[4.5]deca-3,6,9-triene-2,8-dione* (3m)**

Pale yellow crystal; yield: 69.9 mg (83%); m.p. 104-106 oC. − IR (KBr): *ν* = 2923, 1693, 1666, 1627, 1368, 1275, 1034, 872 cm-1. − 1H NMR (400 MHz, CDCl3): *δ* = 7.31 (dd, *J*H-H = 7.8, 1.0 Hz, 1H), 7.21-7.17 (m, 1H), 7.14-7.10 (m, 2H), 7.05-7.03 (m, 3H), 6.99 (d, *J*H-H = 6.4 Hz, 1H), 6.91 (td, *J*H-H = 7.5 Hz, *J*H-H = 1.3 Hz, 1H), 6.52 (d, *J*H-H = 10.2 Hz, 2H), 6.41 (d, *J*H-H = 10.2 Hz, 2H), 2.89 (s, 3H), 2.29 (s, 3H). − 13C NMR (100 MHz, CDCl3): *δ* = 184.0 (C=O), 168.7 (C=O), 153.6, 145.1 (CH), 140.3, 134.5 (CH), 133.0 (CH), 130.9, 130.0 (CH), 129.8, 129.2 (CH), 128.4 (CH), 128.0 (CH), 127.9, 127.8 (CH), 126.4 (CH), 69.2, 26.4 (CH3), 22.6 (CH3). − HR MS ((+)ESI): *m/z* = 444.0468 (calcd. 444.0473 for C23H19NO2SeNa [M + H]+).

***1-Methyl-4-phenyl-3-(m-tolylselanyl)-1-azaspiro[4.5]deca-3,6,9-triene-2,8-dione* (3n)**

Colorless acicular crystal; yield: 71.6 mg (85%); m.p. 163-164 oC. − IR (KBr): *ν* = 2920, 1702, 1687, 1668, 1628, 1362, 868 cm-1. − 1H NMR (400 MHz, CDCl3): *δ* = 7.25-7.21 (m, 1H), 7.18-7.13 (m, 4H), 7.08-7.05 (m, 2H), 6.99 (t, *J*H-H = 7.4 Hz, 1H), 6.95 (d, *J*H-H = 7.6 Hz, 1H), 6.50 (d, *J*H-H = 10.2 Hz, 2H), 6.42 (d, *J*H-H = 10.2 Hz, 2H), 2.90 (s, 3H), 2.18 (s, 3H). − 13C NMR (100 MHz, CDCl3): *δ* = 184.0 (C=O), 168.9 (C=O), 153.4, 145.1 (CH), 138.6, 134.8 (CH), 133.0 (CH), 131.1, 131.0 (CH), 130.3, 129.2 (CH), 128.8 (CH), 128.7 (CH), 128.0 (CH), 127.9 (CH), 126.5, 69.1, 26.4 (CH3), 21.1 (CH3). − HR MS ((+)ESI): *m/z* = 422.0647 (calcd. 422.0654 for C23H20NO2Se [M + H]+).

***1-Methyl-4-phenyl-3-(p-tolylselanyl)-1-azaspiro[4.5]deca-3,6,9-triene-2,8-dione* (3o)**

Pale yellow acicular crystal; yield: 73.2 mg (87%); m.p. 163-164 oC (lit.1 152.2-157.8 oC). − IR (KBr): *ν* = 2921, 1702, 1667, 1628, 1362, 1362, 1035, 869 cm-1. − 1H NMR (400 MHz, CDCl3): *δ* = 7.29-7.24 (m, 3H), 7.19 (t, *J*H-H = 7.2 Hz, 2H), 7.09-7.06 (m, 2H), 6.91 (d, *J*H-H = 7.9 Hz, 2H), 6.49 (d, *J*H-H = 10.2 Hz, 2H), 6.42 (d, *J*H-H = 10.2 Hz, 2H), 2.89 (s, 3H), 2.25 (s, 3H). − 13C NMR (100 MHz, CDCl3): *δ* = 184.0 (C=O), 153.4 (C=O), 145.1 (CH), 138.1, 134.4 (CH), 133.0 (CH), 131.2, 130.5, 129.8 (CH), 129.2 (CH), 128.1 (CH), 128.0 (CH), 123.1, 69.0, 26.3 (CH3), 21.1 (CH3). − HR MS ((+)ESI): *m/z* = 444.0468 (calcd. 444.0473 for C23H19NO2SeNa [M + Na]+).

***3-((3,4-Dimethylphenyl)selanyl)-1-methyl-4-phenyl-1-azaspiro[4.5] deca-3,6,9-triene-2,8-dione* (3p)**

Colorless acicular crystal; yield: 78.3 mg (90%); m.p. 127-128 oC. − IR (KBr): *ν* = 2917, 1702, 1688, 1665, 1625, 1363, 985, 870 cm-1. − 1H NMR (400 MHz, CDCl3): *δ* = 7.23-7.20 (m, 1H), 7.17-7.12 (m, 3H), 7.10 (s, 1H), 7.04 (dd, *J*H-H = 8.5 Hz, *J*H-H = 1.4 Hz, 2H), 6.86 (d, *J*H-H = 7.8 Hz, 1H), 6.49 (d, *J*H-H = 10.2 Hz, 2H), 6.41 (d, *J*H-H = 10.2 Hz, 2H), 2.89 (s, 3H), 2.14 (s, 3H), 2.08 (s, 3H) . − 13C NMR (100 MHz, CDCl3): *δ* = 184.0 (C=O), 168.9 (C=O), 152.7, 145.2, 137.2, 136.8, 135.8, 133.0, 132.0, 131.1, 130.7, 130.2, 129.0, 128.0, 127.9, 122.9, 69.1, 26.4 (CH3), 19.5 (CH3), 19.4 (CH3) . − HR MS ((+)ESI): *m/z* = 458.0621 (calcd. 458.0629 for C24H21NO2SeNa [M + Na]+).

***3-((3-Methoxyphenyl)selanyl)-1-methyl-4-phenyl-1-azaspiro[4.5] deca-3,6,9-triene-2,8-dione* (3q)**

Colorless crysta; yield: 81.3 mg (93%); m.p. 141-142 oC. − IR (KBr): *ν* = 2923, 2852, 1698, 1668, 1628, 1585, 1477, 1366, 1231, 1027, 872 cm-1. − 1H NMR (400 MHz, CDCl3): *δ* = 7.23-7.21 (m, 1H), 7.16 (t, *J*H-H = 7.7 Hz, 2H), 7.10 (d, *J*H-H = 7.0 Hz, 2H), 7.01 (t, *J*H-H = 7.8 Hz, 1H), 6.94 (d, *J*H-H = 7.7 Hz, 1H), 6.87 (t, *J*H-H = 1.6 Hz, 1H), 6.69-6.66 (m, 1H), 6.53 (d, *J*H-H = 10.1 Hz, 2H), 6.41 (d, *J*H-H = 10.1 Hz, 2H), 3.67 (s, 3H), 2.89 (s, 3H) . − 13C NMR (100 MHz, CDCl3): *δ* = 183.9 (C=O), 168.7 (C=O), 159.4, 154.4, 145.0 (CH), 133.0 (CH), 131.1, 129.9, 129.7 (CH), 129.3 (CH), 128.1 (CH), 128.0 (CH), 125.8 (CH), 119.0 (CH), 113.7 (CH), 69.1, 55.1 (CH3), 26.4 (CH3). − HR MS ((+)ESI): *m/z* = 438.0597 (calcd. 438.0603 for C23H20NO3Se [M + H]+).

***3-((4-Methoxyphenyl)selanyl)-1-methyl-4-phenyl-1-azaspiro[4.5] deca-3,6,9-triene-2,8-dione* (3r)**3

Colorless crystal; yield: 83.0 mg (95%); m.p. 141-142 oC. − IR (KBr): *ν* = 2833, 1684, 1669, 1489, 1364, 1249, 1029, 869 cm-1. − 1H NMR (400 MHz, CDCl3): *δ* = 7.33 (d, *J*H-H = 8.8 Hz, 1H), 7.25 (t, *J*H-H = 7.4 Hz, 1H), 7.18 (t, *J*H-H = 7.4 Hz, 2H), 6.62 (d, *J*H-H = 8.8 Hz, 2H), 6.48 (d, *J*H-H = 10.2 Hz, 2H), 6.40 (d, *J*H-H = 10.2 Hz, 2H), 3.73 (s, 3H), 2.88 (s, 3H) . − 13C NMR (100 MHz, CDCl3): *δ* = 184.0 (C=O), 168.9 (C=O), 159.8, 152.6, 145.1 (CH), 136.7 (CH), 133.0 (CH), 131.1, 130.8, 129.2 (CH), 128.1 (CH), 116.4, 114.6 (CH), 69.0, 55.2 (CH3), 26.4 (CH3). − HR MS ((+)ESI): *m/z* = 438.0597 (calcd. 438.0603 for C23H20NO3Se [M + H]+).

***3-((4-Fluorophenyl)selanyl)-1-methyl-4-phenyl-1-azaspiro[4.5] deca-3,6,9-triene-2,8-dione* (3s)**

Pale yellow acicular crystal; yield: 69.7 mg (82%); m.p. 134-135 oC. − IR (KBr): *ν* = 2925, 1703, 1669, 1630, 1481, 1364, 1217, 827 cm-1. − 1H NMR (400 MHz, CDCl3): *δ* = 7.38-7.35 (m, 2H), 7.26 (t, *J*H-H = 6.3 Hz, 1H), 7.21-7.17 (m, 2H), 7.06-7.04 (m, 2H), 6.78 (t, *J*H-H = 8.7 Hz, 2H), 6.50 (d, *J*H-H = 10.2 Hz, 2H), 6.41 (d, *J*H-H = 10.2 Hz, 2H), 2.89 (s, 3H). − 13C NMR (100 MHz, CDCl3): *δ* = 183.9 (C=O), 168.7 (C=O), 163.9, 161.5, 153.4, 144.8 (CH), 136.7 (d, *J*F-C = 8.1 Hz, CH), 133.1 (CH), 131.0, 130.3, 129.4 (CH), 128.1 (d, *J*F-C = 17.8 Hz, CH), 121.1 (d, *J*F-C = 3.5 Hz), 116.1 (d, *J*F-C = 21.5 Hz, CH), 69.1, 26.4 (CH3). − 19F NMR (376 MHz, CDCl3): *δ* = -112.8. − HR MS ((+)ESI): *m/z* = 426.0398 (calcd. 426.0403 for C22H17FNO2Se [M + H]+).

***3-((4-Chlorophenyl)selanyl)-1-methyl-4-phenyl-1-azaspiro[4.5] deca-3,6,9-triene-2,8-dione* (3t)**

Colorless acicular crystal; yield: 73.2 mg (83%); m.p. 189-190 oC (lit.1 187.4-188.4 oC). − IR (KBr): *ν* = 2922, 2851, 1700, 1668, 1629, 1467, 1412, 1364, 1083, 1003, 818 cm-1. − 1H NMR (400 MHz, CDCl3): *δ* = 7.32-7.27 (m, 3H), 7.21 (t, *J*H-H = 7.2 Hz, 2H), 7.08-7.05 (m, 4H), 6.49 (d, *J*H-H = 10.3 Hz, 2H), 6.43 (d, *J*H-H = 10.3 Hz, 2H), 2.90 (s, 3H). − 13C NMR (100 MHz, CDCl3): *δ* = 183.8 (C=O), 168.6 (C=O), 154.0, 144.7 (CH), 135.5 (CH), 134.5, 133.2 (CH), 131.0, 130.0, 129.5 (CH), 129.1 (CH), 128.3 (CH), 128.0 (CH), 124.9, 69.1, 26.4 (CH3). − HR MS ((+)ESI): *m/z* = 442.0100 (calcd. 442.0108 for C22H17ClNO2Se [M + H]+).

***3-((4-Aromophenyl)selanyl)-1-methyl-4-phenyl-1-azaspiro[4.5] deca-3,6,9-triene-2,8-dione* (3u)**3

Colorless acicular crysta; yield: 79.5 mg (82%); m.p.197-198 oC. − IR (KBr): *ν* = 2922, 1700, 1668, 1629, 1411, 1362, 1060, 999, 810 cm-1. − 1H NMR (400 MHz, CDCl3): *δ* = 7.32-7.28 (m, 2H), 7.24-7.19 (m, 5H), 7.07-7.05 (m, 2H), 6.49 (d, *J*H-H = 10.3 Hz, 2H), 6.43 (d, *J*H-H = 10.3 Hz, 2H), 2.90 (s, 3H). − 13C NMR (100 MHz, CDCl3): *δ* = 183.8 (C=O), 168.6 (C=O), 154.1, 144.7 (CH), 135.7 (CH), 133.2 (CH), 132.1 (CH), 131.0, 129.9, 129.5 (CH), 128.3 (CH), 128.0 (CH), 125.6, 122.6, 69.1, 26.4 (CH3). − HR MS ((+)ESI): *m/z* = calcd for C22H17BrNO2Se [M + H]+ 485.9602, found 485.9595.

***3-((4-Iodophenyl)selanyl)-1-methyl-4-phenyl-1-azaspiro[4.5]deca-3,6,9-triene-2,8-dione* (3v)**

Colorless crystal; yield: 80.0 mg (75%); m.p. 207-208 oC. − IR (KBr): *ν* = 2987, 1701, 1684, 1668, 1629, 1466, 1367, 1061, 810 cm-1. − 1H NMR (400 MHz, CDCl3): *δ* = 7.40 (d, *J*H-H = 8.3 Hz, 2H), 7.32-7.28 (m, 1H), 7.21 (t, *J*H-H = 7.8 Hz, 2H), 7.09 (d, *J*H-H = 8.3 Hz, 2H), 7.05 (d, *J*H-H = 7.2 Hz, 2H), 6.49 (d, *J*H-H = 10.3 Hz, 2H), 6.43 (d, *J*H-H = 10.3 Hz, 2H), 2.90 (s, 3H). − 13C NMR (100 MHz, CDCl3): *δ* = 183.8 (C=O), 168.5 (C=O), 154.2, 144.7 (CH), 138.0 (CH), 135.8 (CH), 133.2 (CH), 130.9, 129.8, 129.5 (CH), 128.3 (CH), 128.0 (CH), 126.6, 94.2, 69.1, 26.4 (CH3). − HR MS ((+)ESI): *m/z* = 533.9459 (calcd. 533.9464 for C22H17INO2Se [M + H]+).

***1-Methyl-3-((4-nitrophenyl)selanyl)-4-phenyl-1-azaspiro[4.5]deca-3,6,9-triene-2,8-dione* (3w)**4

Colorless crystal; yield: 56.9 mg (63%); m.p. 152-153 oC. − IR (KBr): *ν* = 2921, 1698, 1668, 1627, 1595, 1572, 1508, 1361, 1341,1274, 1059 cm-1. − 1H NMR (400 MHz, CDCl3): *δ* = 7.98 (d, *J*H-H = 8.8 Hz, 2H), 7.49 (d, *J*H-H = 8.8 Hz, 2H), 7.34-7.31 (m, 1H), 7.27-7.24 (m, 3H), 7.15 (d, *J*H-H = 7.2 Hz, 2H), 6.54 (d, *J*H-H = 10.3 Hz, 2H), 6.49 (d, *J*H-H = 10.3 Hz, 2H), 2.93 (s, 3H). − 13C NMR (100 MHz, CDCl3): *δ* = 183.7 (C=O), 168.0 (C=O), 156.7, 147.0, 144.3 (CH), 137.4, 133.5 (CH), 132.6 (CH), 130.9, 130.1 (CH), 128.5 (CH), 128.4, 127.8 (CH), 123.8 (CH), 69.2, 26.5 (CH3). − HR MS ((+)ESI): *m/z* = 475.0169 (calcd. 475.0167 for C22H16N2O4SeNa [M + Na]+).

***3-((4-Acetylphenyl)selanyl)-1-methyl-4-phenyl-1-azaspiro[4.5] deca-3,6,9-triene-2,8-dione* (3x)**

Pale yellow crystal; yield: 56.6 mg (63%); m.p. 171-172 oC. − IR (KBr): *ν* = 1699, 1674, 1663, 1625, 1582, 1394, 1358, 1264, 726 cm-1. − 1H NMR (400 MHz, CDCl3): *δ* = 7.70 (d, *J*H-H = 8.4 Hz, 2H), 7.42 (d, *J*H-H = 8.4 Hz, 2H), 7.30-7.28 (m, 1H), 7.27-7.20 (m, 2H), 7.15 (d, *J*H-H = 7.2 Hz, 2H), 6.56 (d, *J*H-H = 10.3 Hz, 2H), 6.47 (d, *J*H-H = 10.3 Hz, 2H), 2.91 (s, 3H), 2.53 (s, 3H). − 13C NMR (100 MHz, CDCl3): *δ* = 183.8 (C=O), 168.3 (C=O), 156.1, 144.6 (CH), 135.9, 134.7, 133.2 (CH), 132.3 (CH), 131.0, 129.7 (CH), 128.9, 128.7 (CH), 128.3 (CH), 127.9 (CH), 69.1, 26.5 (CH3), 26.4 (CH3). − HR MS ((+)ESI): *m/z* = 450.0595 (calcd. 450.0603 for C24H20NO3Se [M + H]+).

***4-((1-Methyl-2,8-dioxo-4-phenyl-1-azaspiro[4.5]deca-3,6,9-trien-3-yl)selanyl)benzonitrile* (3y)**

Colorless crystal; yield: 37.2 mg (43%); m.p. 143-144 oC (lit.3 158-160 oC). − IR (KBr): *ν* = 2923, 2223, 1707, 1668, 1627, 1584, 1480, 1384, 1366, 869 cm-1. − 1H NMR (400 MHz, CDCl3): *δ* = 7.44 (*J*H-H = 8.5 Hz, 2H), 7.39 (*J*H-H = 8.5 Hz, 2H), 7.35-7.31 (m, 1H), 7.27-7.23 (m, 2H), 7.14-7.12 (m, 2H), 6.53 (d, *J*H-H = 10.4 Hz, 2H), 6.48 (d, *J*H-H = 10.4 Hz, 2H), 2.92 (s, 3H). − 13C NMR (100 MHz, CDCl3): *δ* = 183.6 (C=O), 168.1 (C=O), 156.4, 144.3 (CH), 134.7, 133.4 (CH), 132.9 (CH), 132.2 (CH), 130.9, 130.0 (CH), 128.6, 128.5 (CH), 127.8 (CH), 118.3, 111.1, 69.1, 26.5 (CH3). − HR MS ((+)ESI): *m/z* = 433.0444 (calcd. 433.0450 for C23H17N2O2Se [M + H]+).

***1-Methyl-4-phenyl-3-((4-(trifluoromethoxy)phenyl)selanyl)-1-azaspiro[4.5]deca-3,6,9-triene-2,8-dione* (3z)**

Colorless crystal; yield: 56.9 mg (58%); m.p. 145-146 oC. − IR (KBr): *ν* = 2925, 1700, 1685, 1670, 1483, 1367, 1268, 1213, 1166, 736 cm-1. − 1H NMR (400 MHz, CDCl3): *δ* = 7.37 (d, *J*H-H = 8.7 Hz, 2H), 7.24 (t, *J*H-H = 7.4 Hz, 1H), 7.16 (t, *J*H-H = 7.2 Hz, 2H), 7.03 (d, *J*H-H = 7.2 Hz, 2H), 6.91 (d, *J*H-H = 8.0 Hz, 2H), 6.51 (d, *J*H-H = 10.2 Hz, 2H), 6.42 (d, *J*H-H = 10.2 Hz, 2H), 2.91 (s, 3H). − 13C NMR (100 MHz, CDCl3): *δ* = 183.8 (C=O), 168.6 (C=O), 153.6, 149.0, 144.7 (CH), 135.8 (CH), 133.2 (CH), 130.8, 130.0, 129.4 (CH), 128.2 (CH), 127.9 (CH), 124.7, 121.5, 121.3 (CH), 119.0, 69.2, 26.4 (CH3). − 19F NMR (376 MHz, CDCl3): *δ* = -57.7. − HR MS ((+)ESI): *m/z* = 514.0143 (calcd. 514.0140 for C23H16F3NO3SeNa [M + Na]+).

***1-Methyl-4-phenyl-3-(pyridin-3-ylselanyl)-1-azaspiro[4.5]deca-3,6,9-triene-2,8-dione* (3ap)**

Pale yellow crystal; yield: 39.2 mg (48%); m.p. 155-156 oC. − IR (KBr): *ν* = 2921, 1697, 1667, 1627, 1569, 1557, 1415, 1361, 871 cm-1. − 1H NMR (400 MHz, CDCl3): *δ* = 8.34-8.33 (m, 1H), 7.40 (td, *J*H-H = 7.6 Hz, *J*H-H = 1.9 Hz, 1H), 7.29-7.23 (m, 6H), 7.04-7.01 (m, 1H), 6.63 (d, *J*H-H = 10.1 Hz, 2H), 6.48 (d, *J*H-H = 10.1 Hz, 2H), 2.92 (s, 3H). − 13C NMR (100 MHz, CDCl3): *δ* = 184.0 (C=O), 168.5 (C=O), 157.1, 153.3, 150.2 (CH), 145.1 (CH), 136.4 (CH), 133.1 (CH), 131.5, 129.7 (CH), 128.6, 128.3 (CH), 127.9 (CH), 126.4 (CH), 121.4 (CH), 69.0, 26.4 (CH3). − HR MS ((+)ESI): *m/z* = 409.0441 (calcd. 409.0450 for C21H17N2O2Se [M + H]+).

***1-Methyl-4-phenyl-3-(thiophen-2-ylselanyl)-1-azaspiro[4.5]deca-3,6,9-triene-2,8-dione* (3aq)**

Plae yellow crystal; yield: 29.7 mg (36%); m.p. 165-166 oC. − IR (KBr): *ν* = 2922, 1687, 1665, 1626, 1267, 1215, 870 cm-1. − 1H NMR (400 MHz, CDCl3): *δ* = 7.30-7.26 (m, 2H), 7.24-7.20 (m, 2H), 7.08 (d, *J*H-H = 7.0 Hz, 2H), 7.04 (dd, *J*H-H = 3.5 Hz, *J*H-H = 1.0 Hz, 1H), 6.77 (dd, *J*H-H = 5.3 Hz, *J*H-H = 3.6 Hz, 1H), 6.48 (d, *J*H-H = 10.2 Hz, 2H), 6.40 (d, *J*H-H = 10.2 Hz, 2H), 2.89 (s, 3H). − 13C NMR (100 MHz, CDCl3): *δ* = 183.9 (C=O), 168.4 (C=O), 153.8, 144.7 (CH), 137.4 (CH), 133.1 (CH), 131.8 (CH), 130.8, 130.5, 129.3 (CH), 128.2 (CH), 128.0 (CH), 127.7 (CH), 119.4, 69.1, 26.4 (CH3), 22.6 (CH3). − HR MS ((+)ESI): *m/z* = 414.0054 (calcd. 414.0061 for C20H16NO2SSe [M + H]+).

***3-(Benzylselanyl)-1-methyl-4-phenyl-1-azaspiro[4.5]deca-3,6,9-triene-2,8-dione* (3ar)**

Pale yellow acicular crystal; yield: 73.2 mg (87%); m.p. 146-147 oC. − IR (KBr): *ν* = 2926, 1693, 1666, 1626, 1367, 1061, 874 cm-1. − 1H NMR (400 MHz, CDCl3): *δ* = 7.33-7.29 (m, 1H), 7.26-7.17 (m, 7H), 6.94 (d, *J*H-H = 7.1 Hz, 2H), 6.40 (d, *J*H-H = 10.2 Hz, 2H), 6.31 (d, *J*H-H = 10.2 Hz, 2H), 4.27 (s, 2H), 2.90 (s, 3H). − 13C NMR (100 MHz, CDCl3): *δ* = 184.0 (C=O), 169.1 (C=O), 154.8, 145.0 (CH), 138.4, 132.9 (CH), 131.6, 129.6 (CH), 129.2 (CH), 128.6, 128.3 (CH), 128.2 (CH), 128.0 (CH), 127.0 (CH), 68.7, 29.2 (CH2), 26.3 (CH3). − HR MS ((+)ESI): *m/z* = 422.0646 (calcd. 422.0654 for C23H20NO2Se [M + H]+).

**General experimental procedure for the synthesis of 3-arylthio azaspiro[4,5]trienones (5)**

*N*-(4-Methoxyphenyl)-*N*-methyl-3-phenylpropiolamide **1a** (0.2 mmol, 53.0 mg), diaryldisulfides **4** (0.2 mmol), Selectfluor agent (0.2 mmol, 70.8 mg), and acetonitrile (2.0 mL) were added to a 10 mL reaction tube. The mixture was stirred at 40 oC for 1.5 h. After completion of the reaction, the solvent was distilled under vacuum. Then, the resulting mixture was dissolved with ethyl acetate (15 mL), washed with saturated sodium chloride solution (10 mL × 2). The organic phase was dried over anhydrous Na2SO4 and concentrated under vacuum. The residue was purified by silica gel column chromatography to give 3-arylthio azaspiro[4,5]trienones **5** using ethyl acetate/[dichloromethane](javascript:;) as eluant.

***3-((4-Methoxyphenyl)thio)-1-methyl-4-phenyl-1-azaspiro[4.5] deca-3,6,9-triene-2,8-dione* (5c)**

Colorless crystal; yield: 37.3 mg (48%); m.p. 162-163 oC (lit.5 156.3-157.6 oC). − IR (KBr): *ν* = 2923, 1688, 1667, 1470, 1363, 1285, 1242, 1169, 1033 cm-1; − 1H NMR (400 MHz, CDCl3): *δ* = 7.27-7.20 (m, 5H), 7.15 (d, *J*H-H = 6.9 Hz, 2H), 6.68 (d, *J*H-H = 8.7 Hz, 2H), 6.50 (d, *J*H-H = 10.2 Hz, 2H), 6.43 (d, *J*H-H = 10.2 Hz, 2H), 3.73 (s, 3H), 2.86 (s, 3H); − 13C NMR (100 MHz, CDCl3): *δ* = 184.0, 167.8, 159.7, 150.2, 145.3 (CH), 134.5 (CH), 133.5, 133.0 (CH), 130.6, 129.3 (CH), 128.3 (CH), 128.1 (CH), 121.0, 114.4 (CH), 67.6, 55.2 (CH3), 26.3 (CH3); − HR MS ((+)ESI): *m/z* = 390.1152 (calcd. 390.1158 for C23H20NO3S [M + H]+).

***3-((2-Fluorophenyl)thio)-1-methyl-4-phenyl-1-azaspiro[4.5]deca-3,6,9-triene-2,8-dione* (5d)**

Pale yellow crystal; yield: 45.2 mg (60%); m.p. 147-148 oC (lit.6 155.2-156.7 oC). − IR (KBr): *ν* = 2923, 1694, 1664, 1473, 1386, 1373, 1223, 874 cm-1. − 1H NMR (400 MHz, CDCl3): *δ* = 7.35 (td, *J*H-H = 7.5 Hz, *J*F-H = 1.6 Hz, 1H), 7.27-7.19 (m, 5H), 7.18-7.14 (m, 1H), 6.97 (td, *J*H-H = 7.6 Hz, *J*F-H = 1.2 Hz, 1H), 6.53 (d, *J*H-H = 10.2 Hz, 2H), 6.45 (d, *J*H-H = 10.2 Hz, 2H), 2.87 (s, 3H). − 13C NMR (100 MHz, CDCl3): *δ* = 183.9 (C=O), 167.3 (C=O), 162.7, 160.3, 150.2, 145.1 (CH), 134.0 (CH), 133.1 (CH), 131.0 (d, *J*F-C = 1.6 Hz), 130.4, 130.2 (d, *J*F-C = 7.9 Hz, CH), 129.5 (CH), 128.2 (CH), 128.0 (CH), 124.4 (d, *J*F-C = 3.6 Hz, CH), 117.8 (d, *J*F-C = 17.4 Hz), 115.8 (d, *J*F-C = 21.9 Hz, CH), 67.7, 26.2 (CH3). − 19F NMR (376 MHz, CDCl3): *δ* = -107.5. − HR MS ((+)ESI): *m/z* = 378.0950 (calcd. 378.0959 for C22H17FNO2S [M + H]+).

***3-((4-Chlorophenyl)thio)-1-methyl-4-phenyl-1-azaspiro[4.5]deca-3,6,9-triene-2,8-dione* (5e)**

Pale yellow acicular crystal; yield: 44.0 mg (56%); m.p. 182-183 oC (lit.5 180.7-181.3 oC). − IR (KBr): *ν* = 2921, 1705, 1671, 1632, 1470, 1413, 1368, 1089, 1001, 869 cm-1. − 1H NMR (400 MHz, CDCl3): *δ* = 7.34-7.30 (m, 1H), 7.28-23 (m, 3H), 7.21-7.18 (m, 3H), 7.14 (d, *J*H-H = 8.6 Hz, 2H), 6.53 (d, *J*H-H = 10.3 Hz, 2H), 6.46 (d, *J*H-H = 10.3 Hz, 2H), 2.88 (s, 3H). − 13C NMR (100 MHz, CDCl3): *δ* = 183.8, 167.4, 152.9, 144.8 (CH), 133.8, 133.2 (CH), 132.5 (CH), 131.8, 130.4, 130.0, 129.8 (CH), 129.0 (CH), 128.4 (CH), 128.1 (CH), 67.7, 26.3 (CH3). − HR MS ((+)ESI) *m/z* = 394.0657 (calcd. 394.0663 for C22H17ClNO2S [M + H]+).

***1-Methyl-3-((2-nitrophenyl)thio)-4-phenyl-1-azaspiro[4.5]deca-3,6,9-triene-2,8-dione* (5f)**

Pale yellow crystal; yield: 36.3 mg (45%); m.p. 175-177 oC. − IR (KBr): *ν* = 2920, 1704, 1666, 1626, 1513, 1371, 1337, 1304, 731 cm-1. − 1H NMR (400 MHz, CDCl3): *δ* = 8.19 (dd, *J*H-H = 8.2 Hz, *J*H-H = 1.3 Hz, 1H), 7.50 (td, *J*H-H = 7.6, 0.7 Hz, 1H), 7.41-7.37 (m, 1H), 7.36-7.31 (m, 5H), 7.26-7.24 (m, 1H), 6.60 (d, *J*H-H = 10.3 Hz, 2H), 6.54 (d, *J*H-H = 10.3 Hz, 2H), 2.92 (s, 3H). − 13C NMR (100 MHz, CDCl3): *δ* = 183.7 (C=O), 166.9 (C=O), 159.1, 146.7, 144.3 (CH), 133.6 (CH), 133.5 (CH), 133.1, 130.5 (CH), 130.2, 130.0, 129.1 (CH), 128.7 (CH), 127.8 (CH), 126.5 (CH), 126.1 (CH), 68.0, 26.4 (CH3). − 19F NMR (376 MHz, CDCl3): *δ* = -107.5. − HR MS ((+)ESI): *m/z* = 405.0898 (calcd. 405.0904 for C22H17N2O4S [M + H]+).

***1-Methyl-3-((3-nitrophenyl)thio)-4-phenyl-1-azaspiro[4.5]deca-3,6,9-triene-2,8-dione* (5g)**

Pale yellow acicular crystal; yield: 37.2 mg (46%); m.p. 227-228 oC (lit.6 156.3-159.2 oC). − IR (KBr): *ν* = 2919, 1697, 1672, 1515, 1368, 1343, 869, 733 cm-1. − 1H NMR (400 MHz, CDCl3): *δ* = 8.02-7.99 (m, 2H), 7.64 (d, *J*H-H = 7.8 Hz, 1H), 7.38 (t, *J*H-H = 8.0 Hz, 1H), 7.34-7.22 (m, 5H), 6.57 (d, *J*H-H = 10.2 Hz, 2H), 6.51 (d, *J*H-H = 10.2 Hz, 2H), 2.91 (s, 3H). − 13C NMR (100 MHz, CDCl3): *δ* = 183.6 (C=O), 167.0 (C=O), 154.4, 148.2, 144.4 (CH), 136.2 (CH), 134.4, 133.5 (CH), 130.5, 130.2, 130.1 (CH), 129.6 (CH), 128.5 (CH), 127.9 (CH), 125.1 (CH), 122.2 (CH), 67.9, 26.4 (CH3). − 19F NMR (376 MHz, CDCl3): *δ* = -107.5. − HR MS ((+)ESI): *m/z* = 405.0897 (calcd. 405.0904 for C22H17N2O4S [M + H]+).

***1-Methyl-4-phenyl-3-(phenyltellanyl)-1-azaspiro[4.5]deca-3,6,9-triene-2,8-dione* (5h)**

Pale yellow powder; yield: 68.5 mg (75%); m.p. 136-137 oC (lit.1 135.1-135.9 oC). − IR (KBr): *ν* = 2920, 1682, 1667, 1628, 1434, 1356, 868, 741 cm-1. − 1H NMR (400 MHz, CDCl3): *δ* = 7.55 (dd, *J*H-H = 7.8, 1.0 Hz, 2H), 7.19-7.13 (m, 2H), 7.11-7.07 (m, 2H), 7.01-6.96 (m, 4H), 6.49 (d, *J*H-H = 10.2 Hz, 2H), 6.38 (d, *J*H-H = 10.2 Hz, 2H), 2.90 (s, 3H). − 13C NMR (100 MHz, CDCl3): *δ* = 184.0 (C=O), 170.9 (C=O), 158.0, 145.1 (CH), 139.7 (CH), 132.9 (CH), 132.0, 129.2 (CH), 129.0 (CH), 128.3 (CH), 128.0 (CH), 127.8 (CH), 118.2, 110.9, 71.1, 26.6 (CH3). − 19F NMR (376 MHz, CDCl3): *δ* = -107.5. − HR MS ((+)ESI): *m/z* = 458.0388 (calcd. 458.0394 for C22H18NO2Te [M + H]+).

**References**

1. Recchi A. M. S., Rosa P. H. P., Back D. F., Zeni G. *Org. Biomol. Chem*. 2020, *18*, 3544-3551.
2. Hua J., Fang Z., Bian M., Ma T., Yang M., Xu J., Liu C. K., He W., Zhu N., Yang Z., Guo K. *ChemSusChem* 2020, *13*, 2053-2059.
3. Sahoo H., Grandhi G. S., Ramakrishna I., Baidya M. *Org. Biomol. Chem*. 2019, *17*, 10163-10166.
4. Sahoo H., Mandal A., Dana S., Baidya M. *Adv. Synth. Catal*. 2018, *360*, 1099-1103.
5. Wei W., Cui H., Yang D., Yue H., He C., Zhang Y., Wang H. *Green Chem*. 2017, *19*, 5608-5613.
6. Qian P. C., Liu Y., Song R. J., Xiang J. N., Li J. H. *Synlett* 2015, *26*, 1213-1216.

# 4. Copies of spectra of products


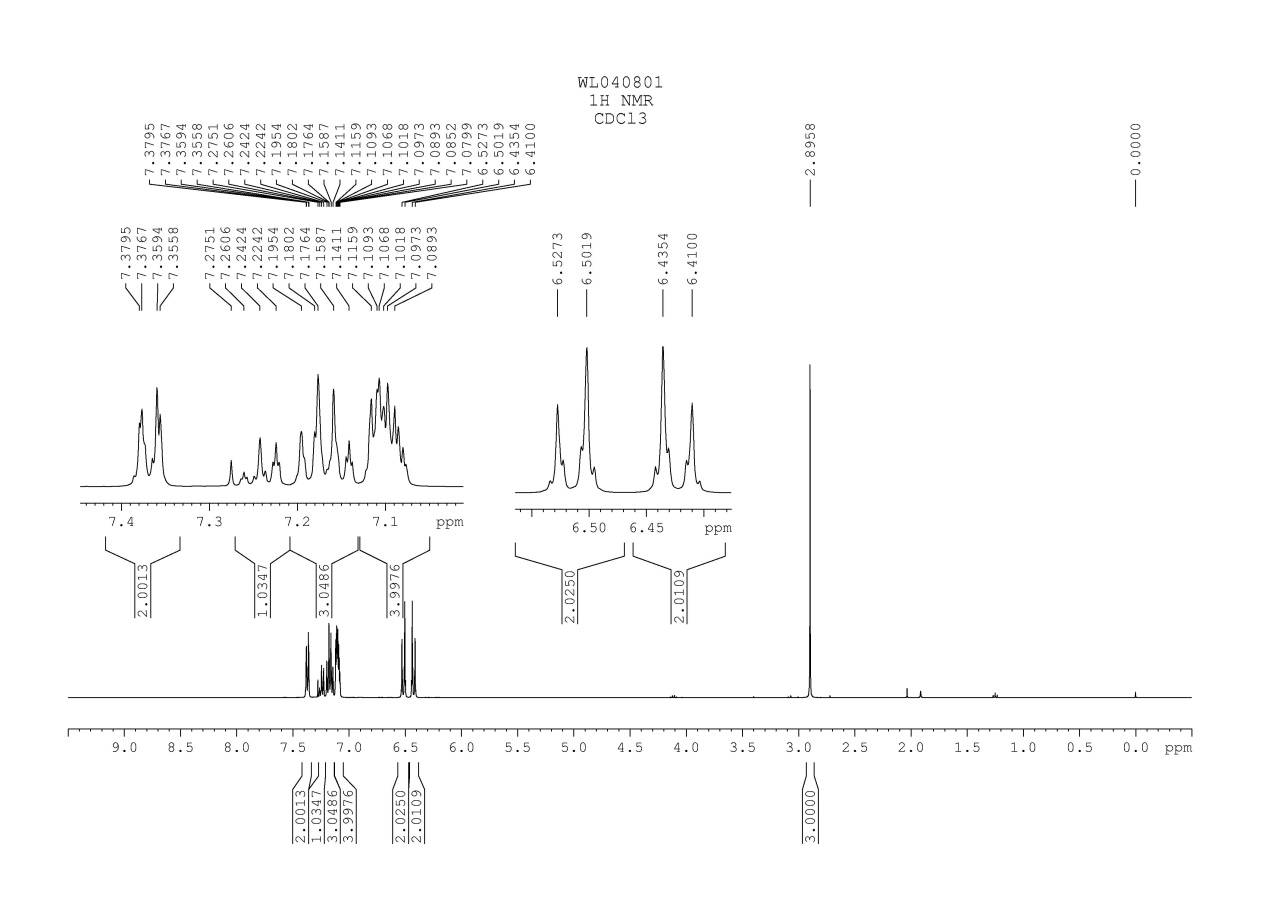


**Fig. 1** 1H NMR spectrum of compound **3ª**

**
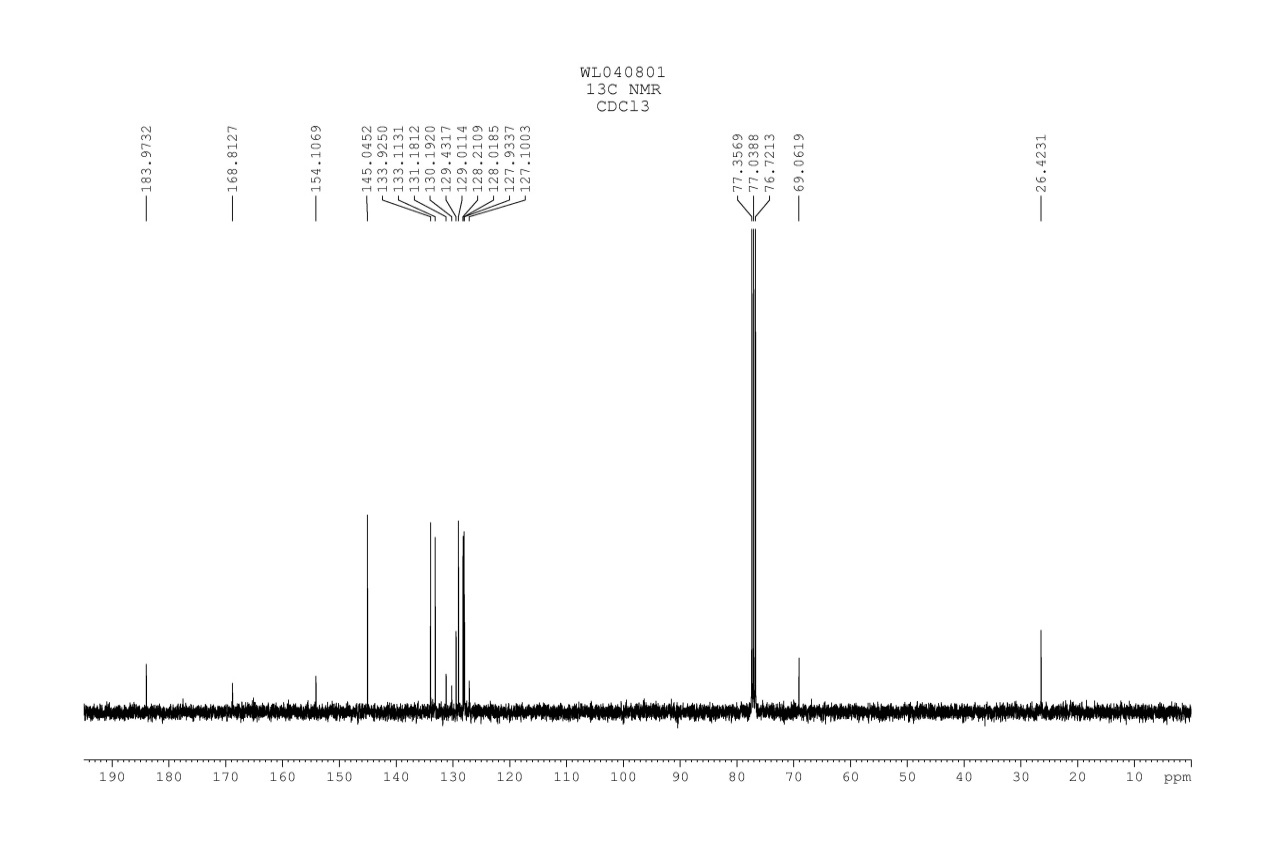
**

**Fig. 2** 13C NMR spectrum of compound **3a**

**
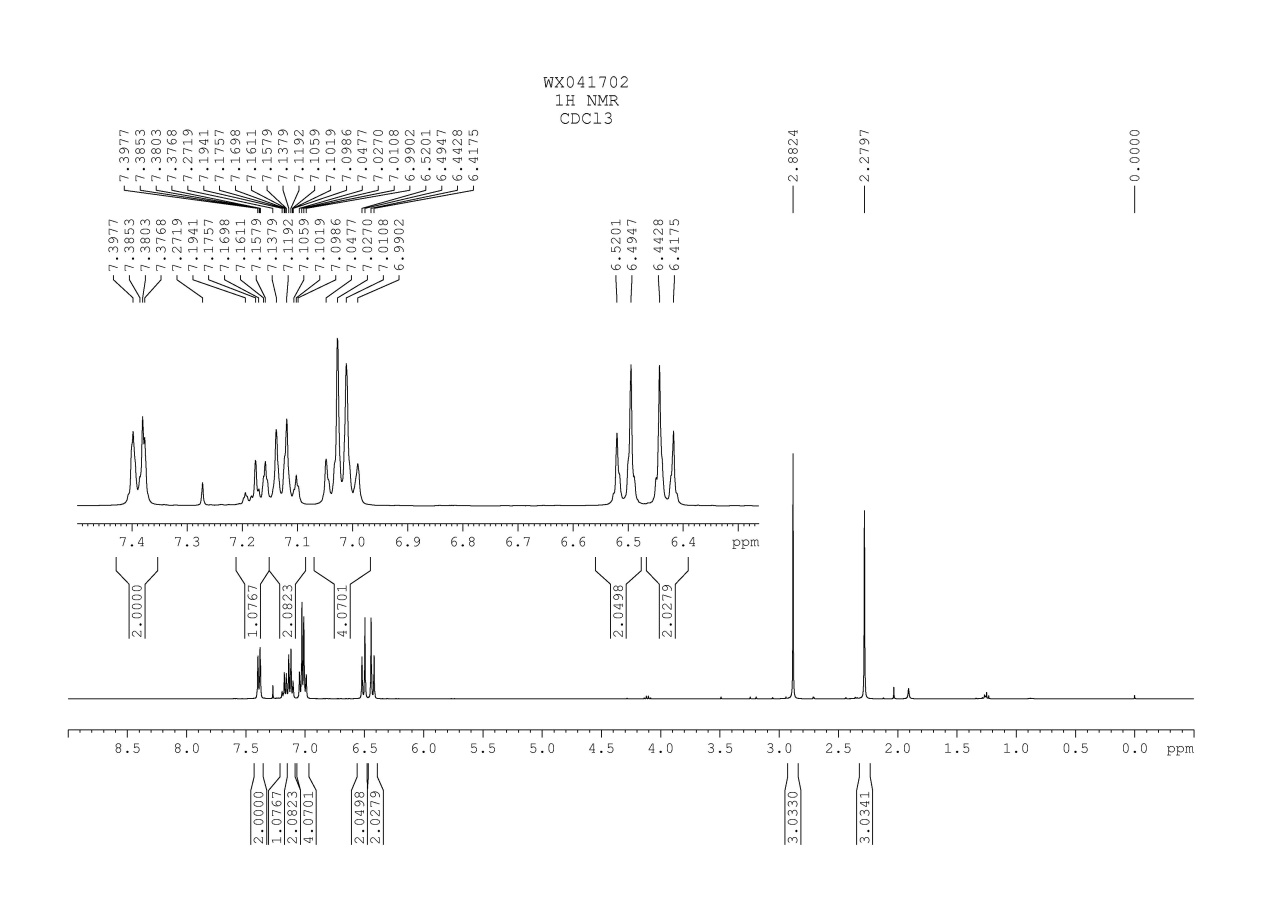
**

**Fig. 3** 1H NMR spectrum of compound **3b**

**
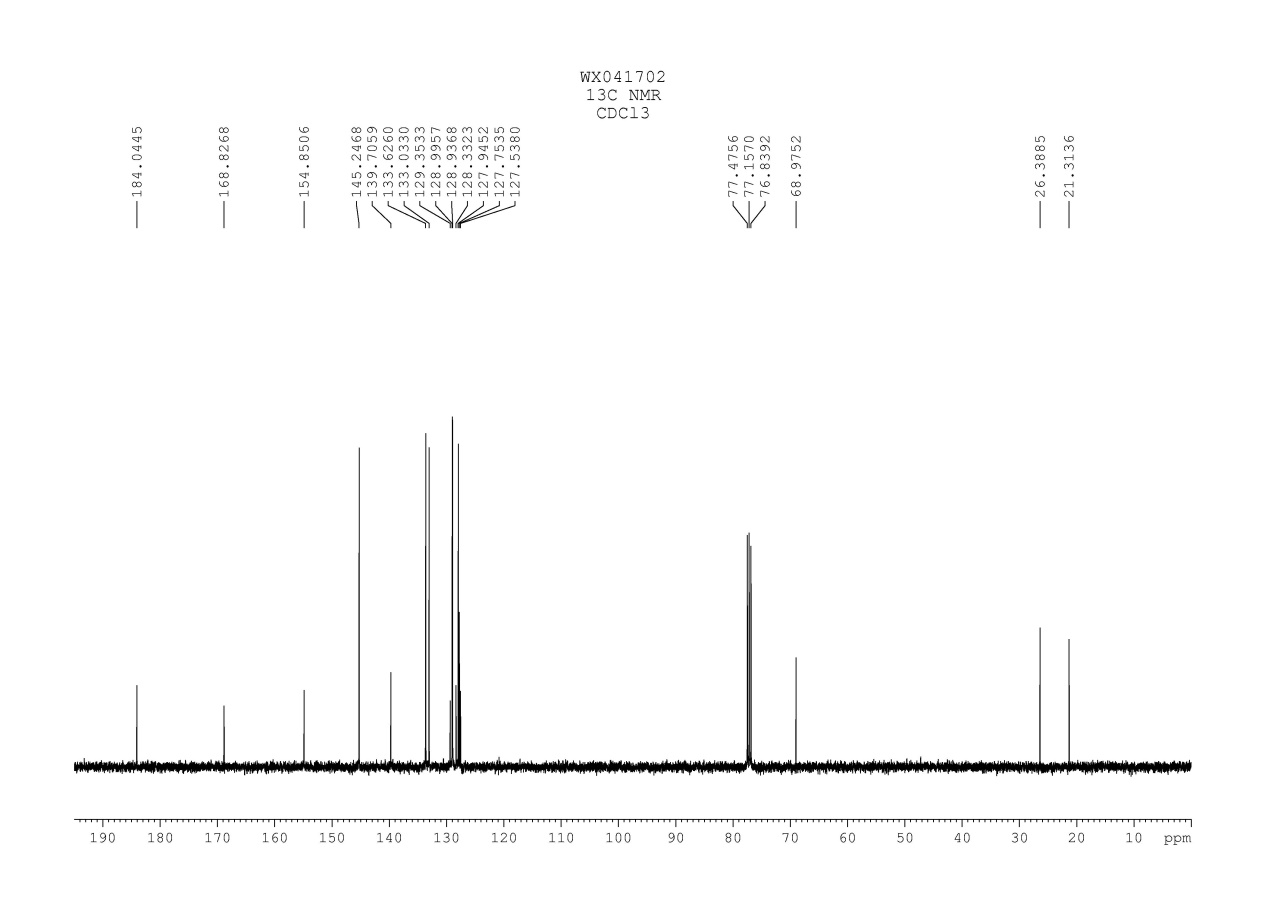
**

**Fig. 4** 13C NMR spectrum of compound **3b**

**
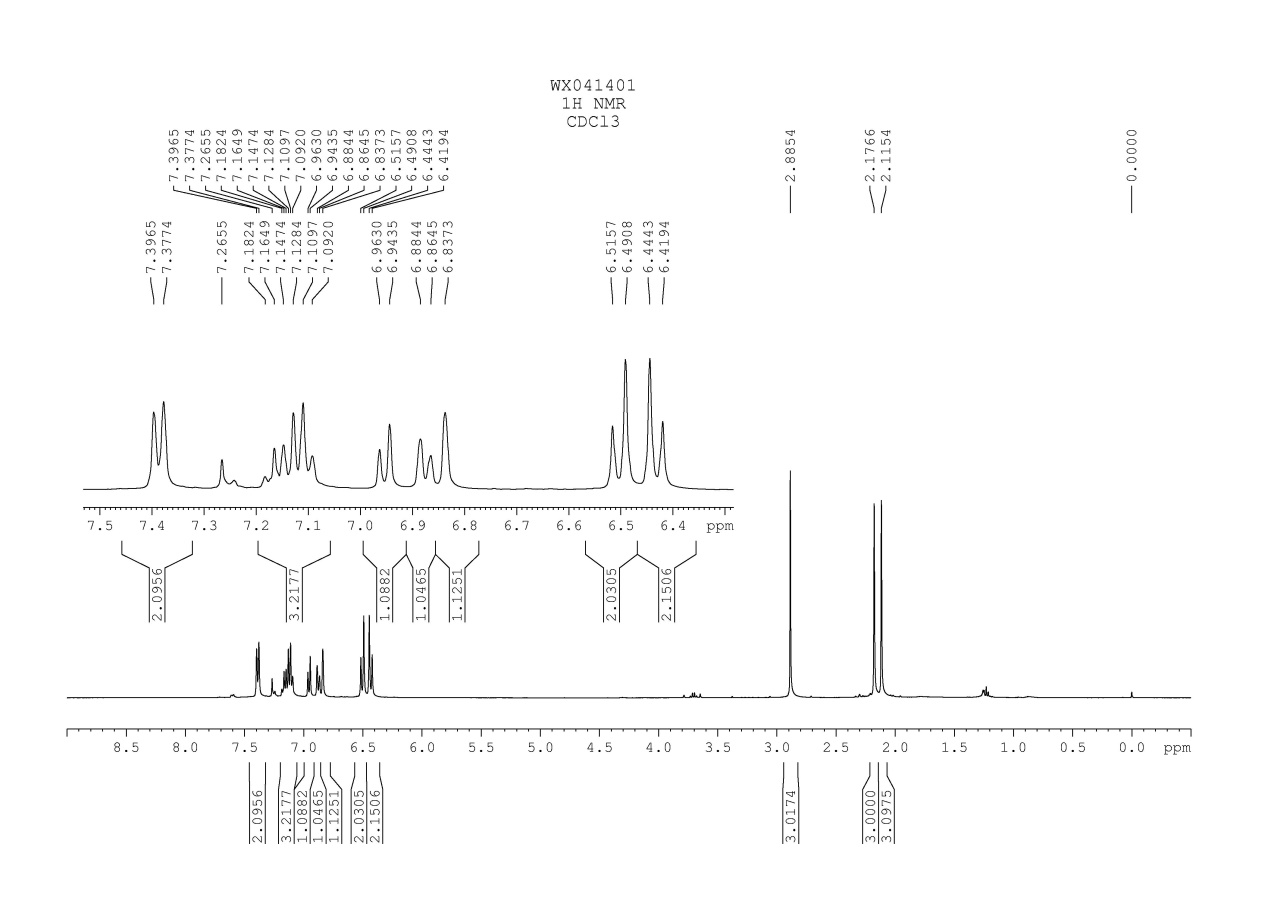
**

**Fig. 5** 1H NMR spectrum of compound **3c**

**
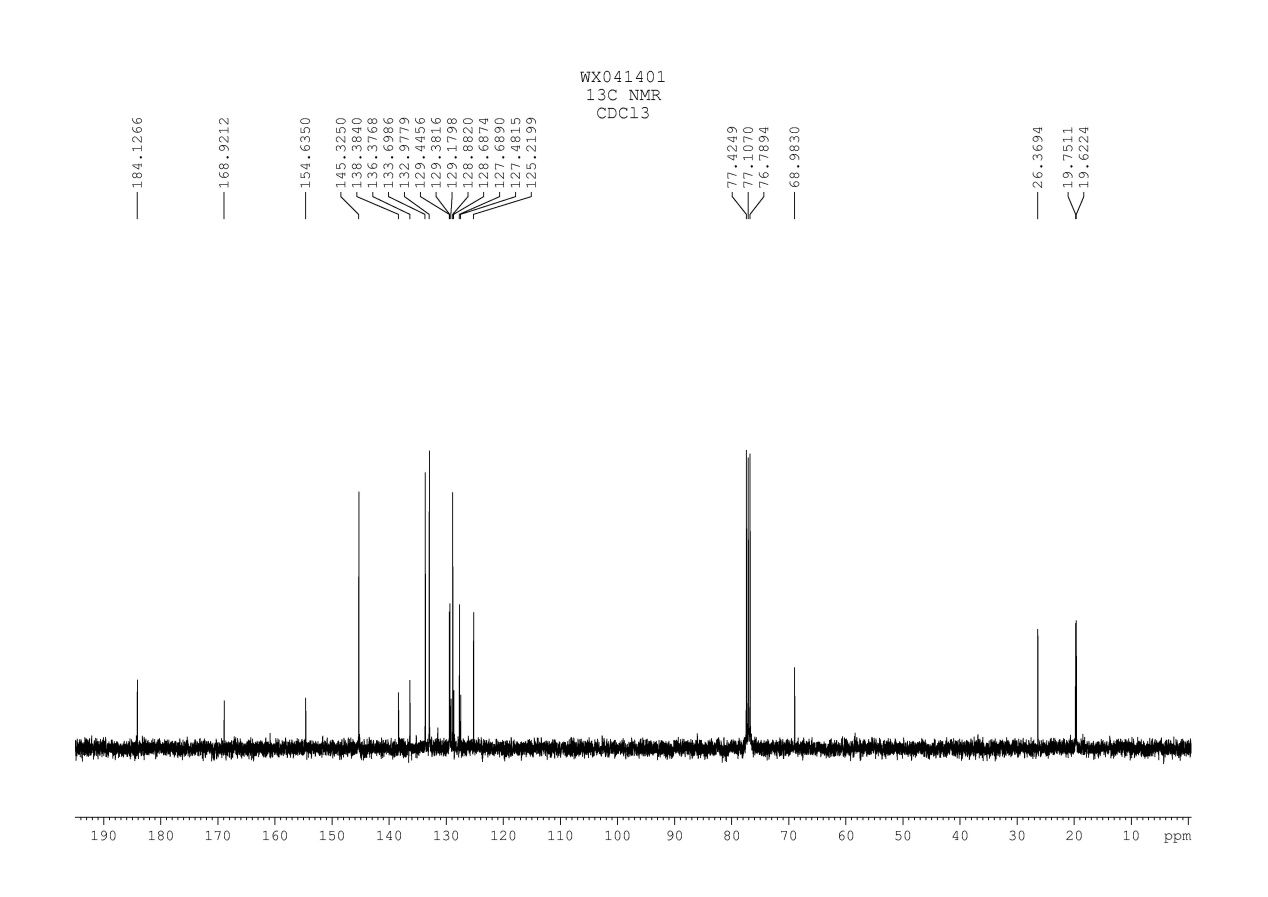
**

**Fig. 6** 13C NMR spectrum of compound **3c**

**
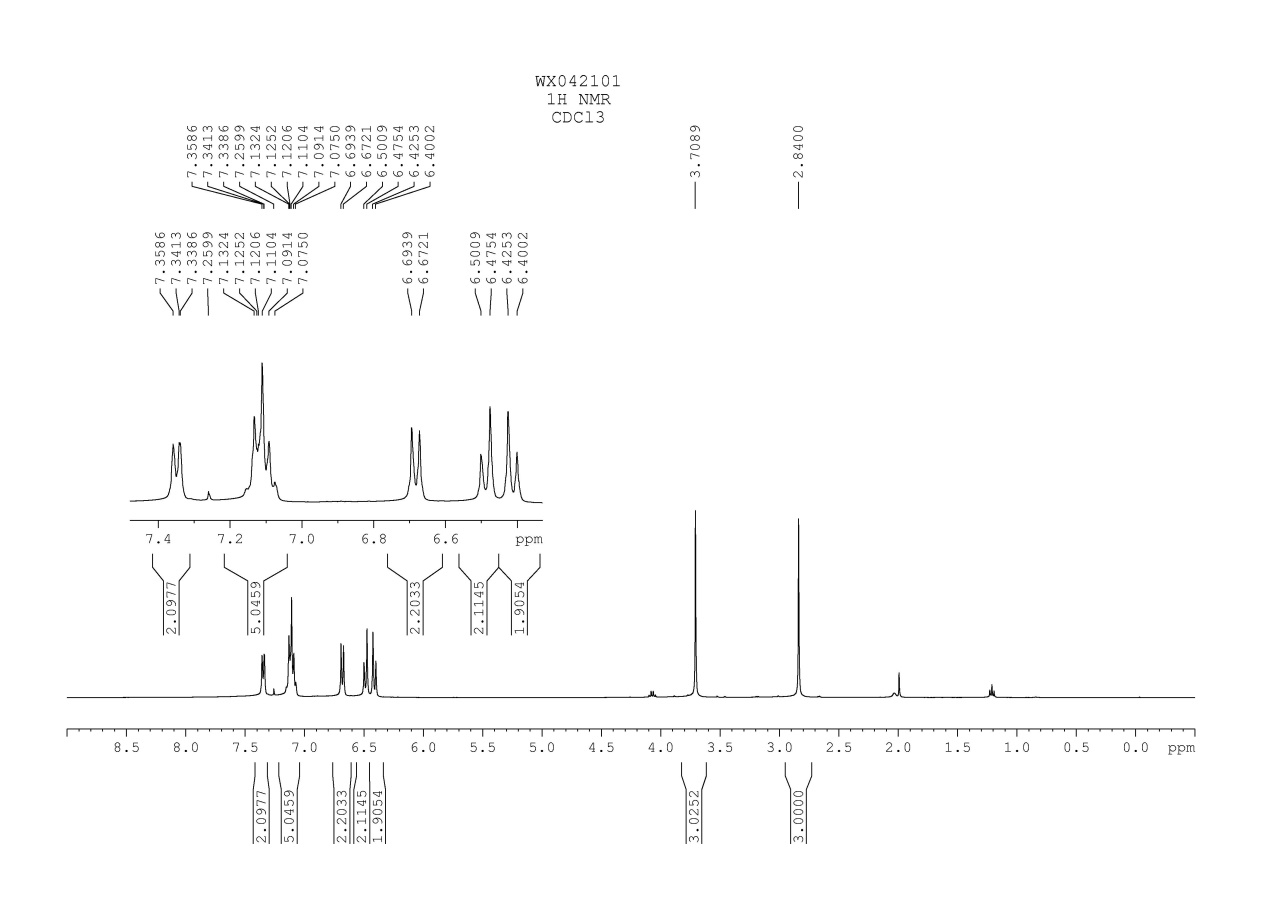
**

**Fig. 7** 1H NMR spectrum of compound **3d**

**
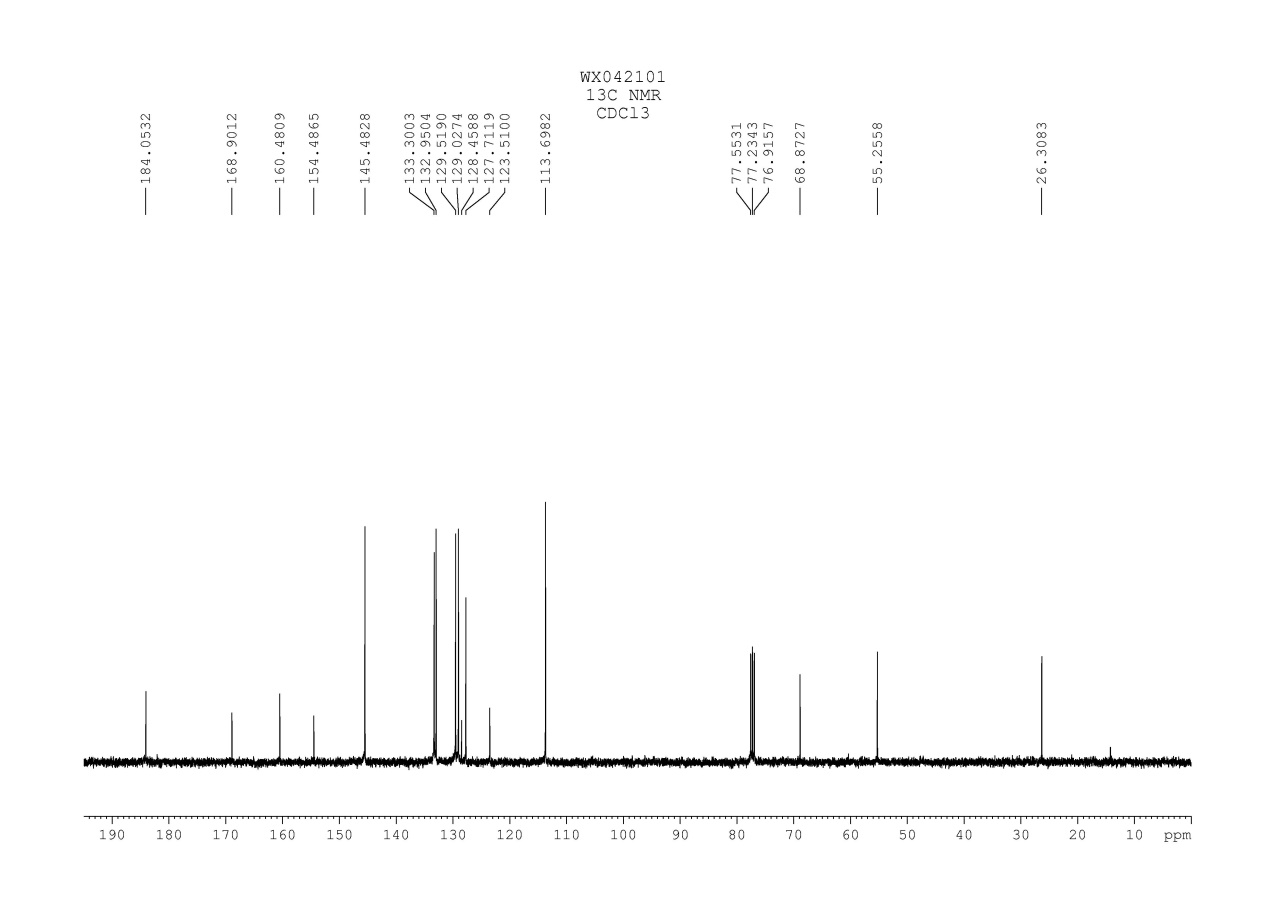
**

**Fig. 8** 13C NMR spectrum of compound **3d**

**
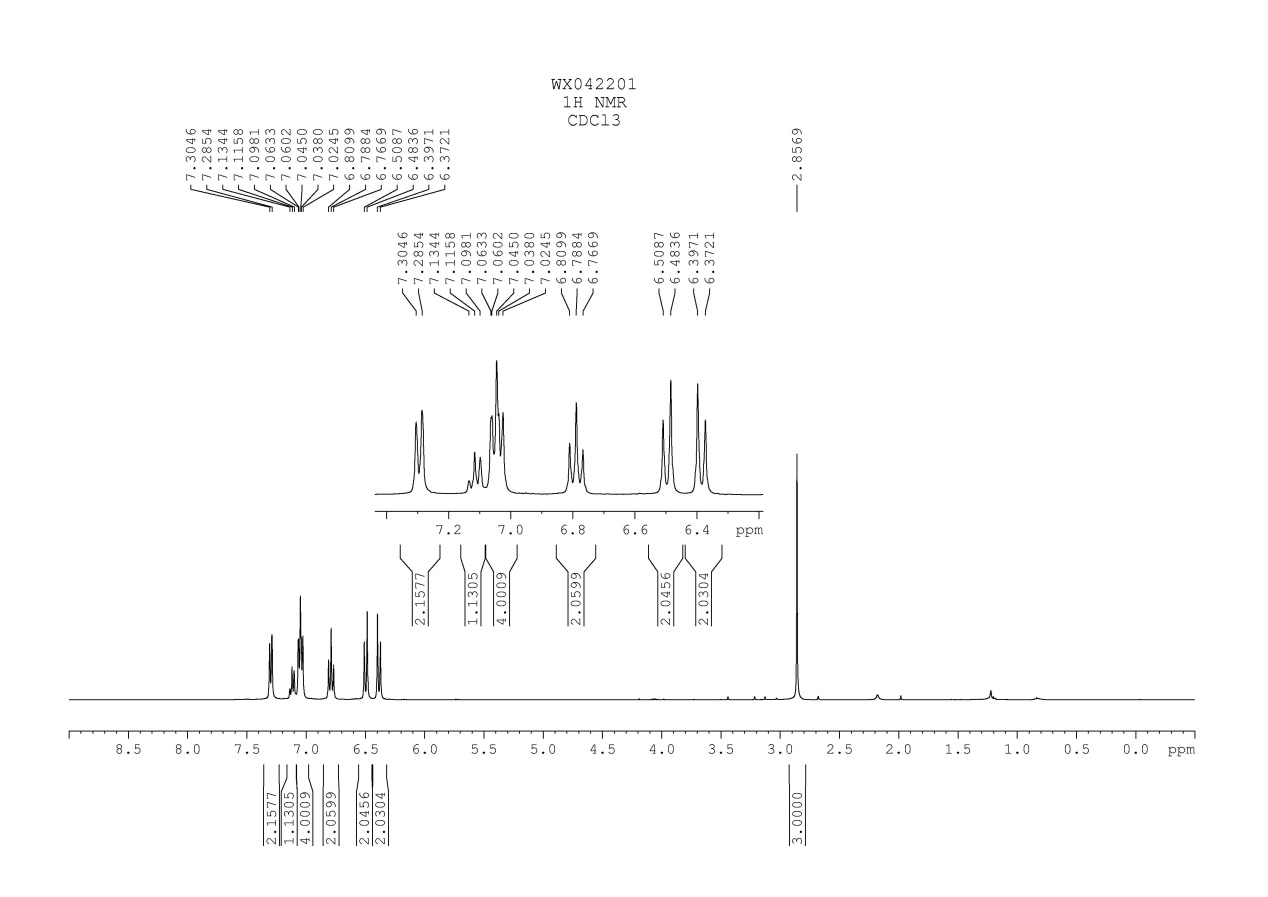
**

**Fig. 9** 1H NMR spectrum of compound **3e**

**
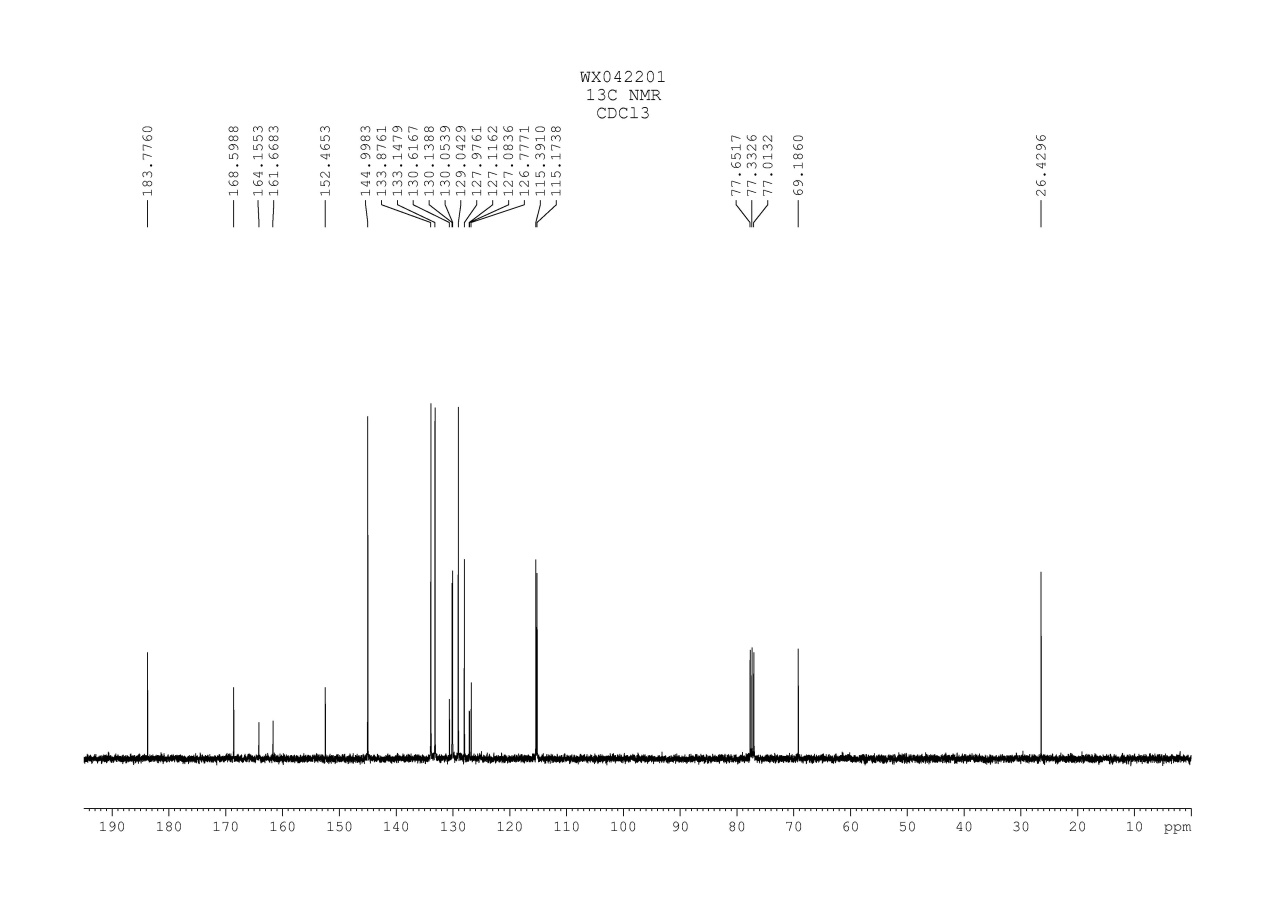
**

**Fig. 10** 13C NMR spectrum of compound **3e**

**
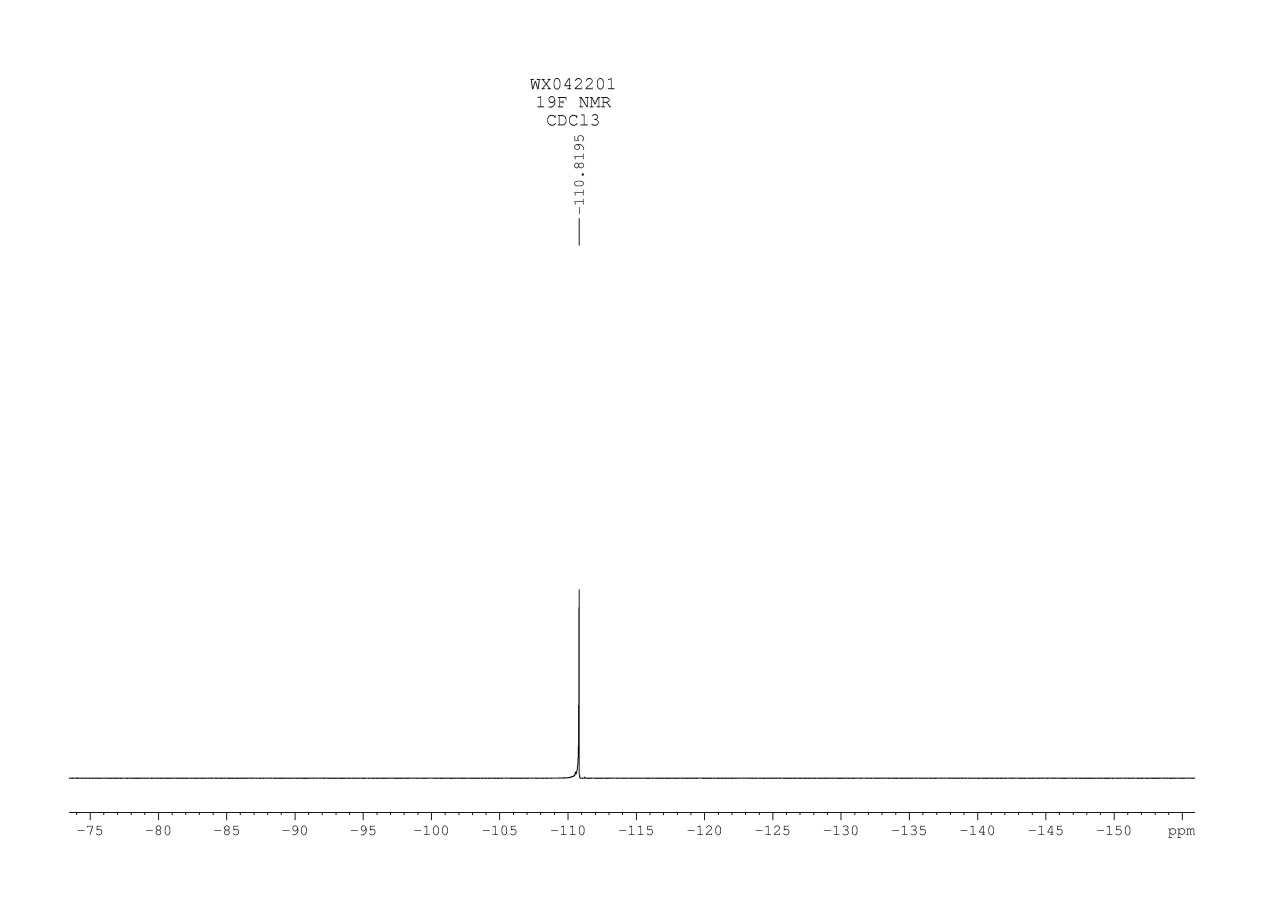
**

**Fig. 11** 19F NMR spectrum of compound **3e**

**
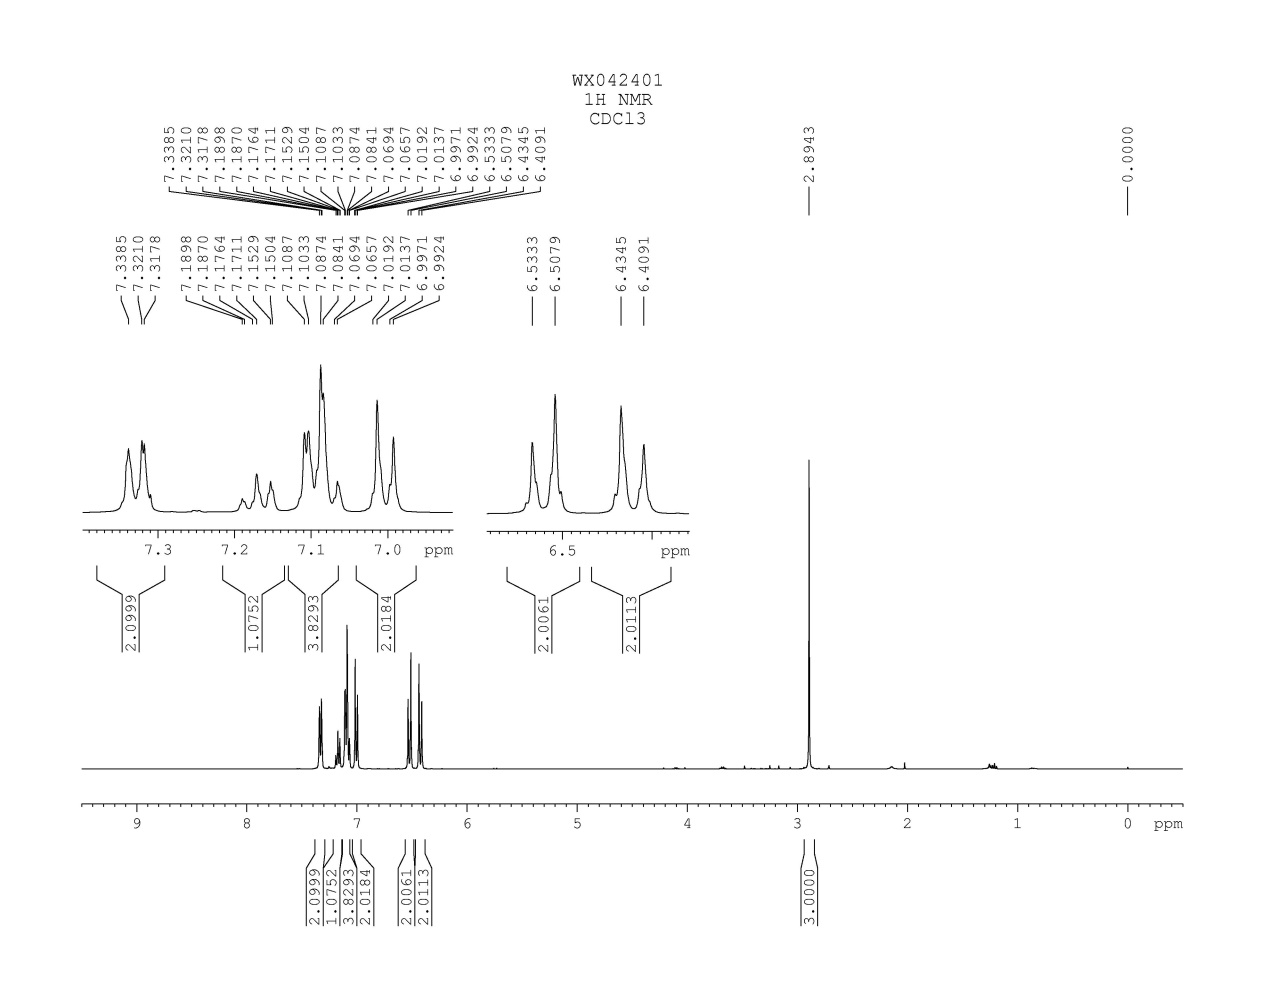
**

**Fig. 12** 1H NMR spectrum of compound **3f**

**
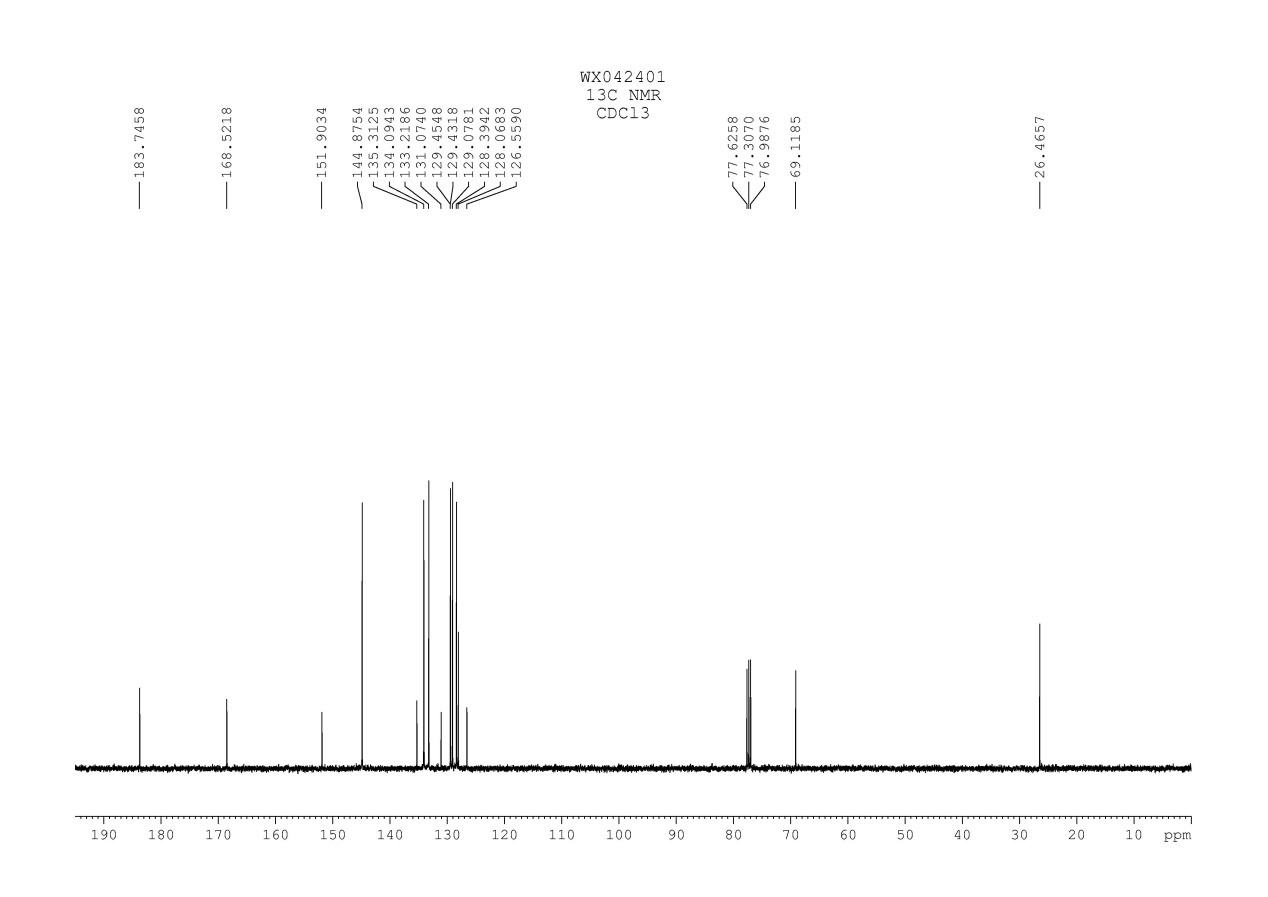
**

**Fig. 13** 13C NMR spectrum of compound **3f**

**
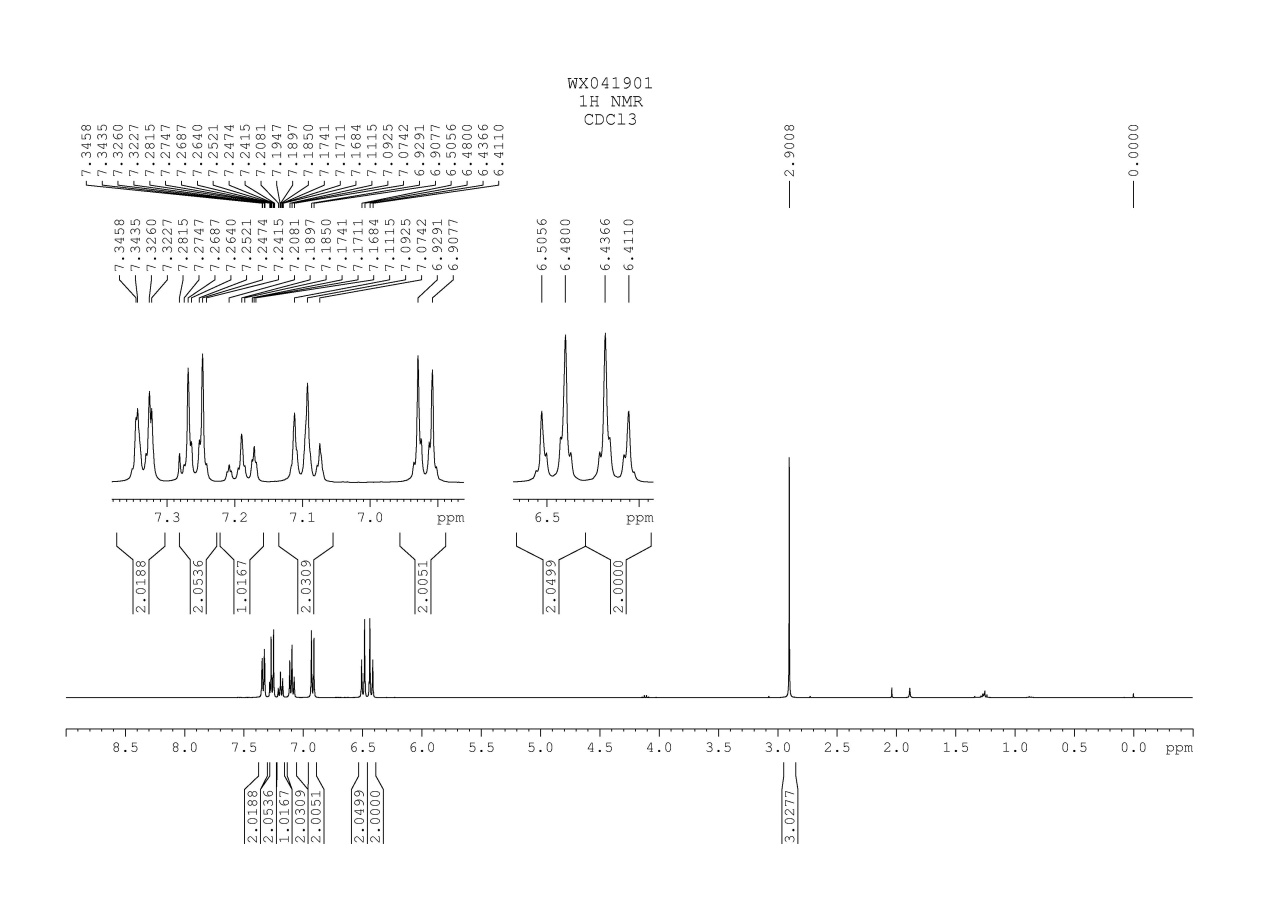
**

**Fig. 14** 1H NMR spectrum of compound **3g**

**
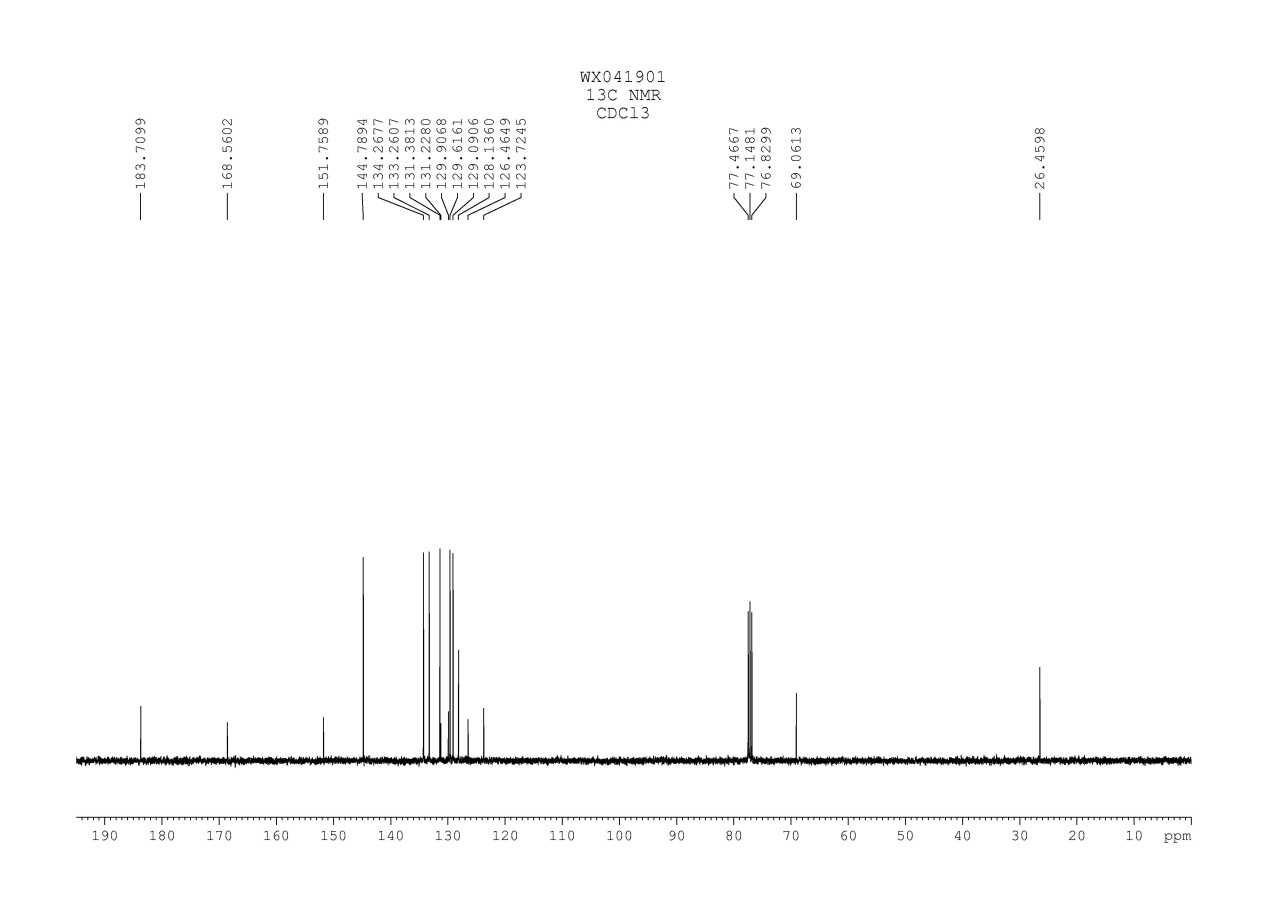
**

**Fig. 15** 13C NMR spectrum of compound **3g**

**
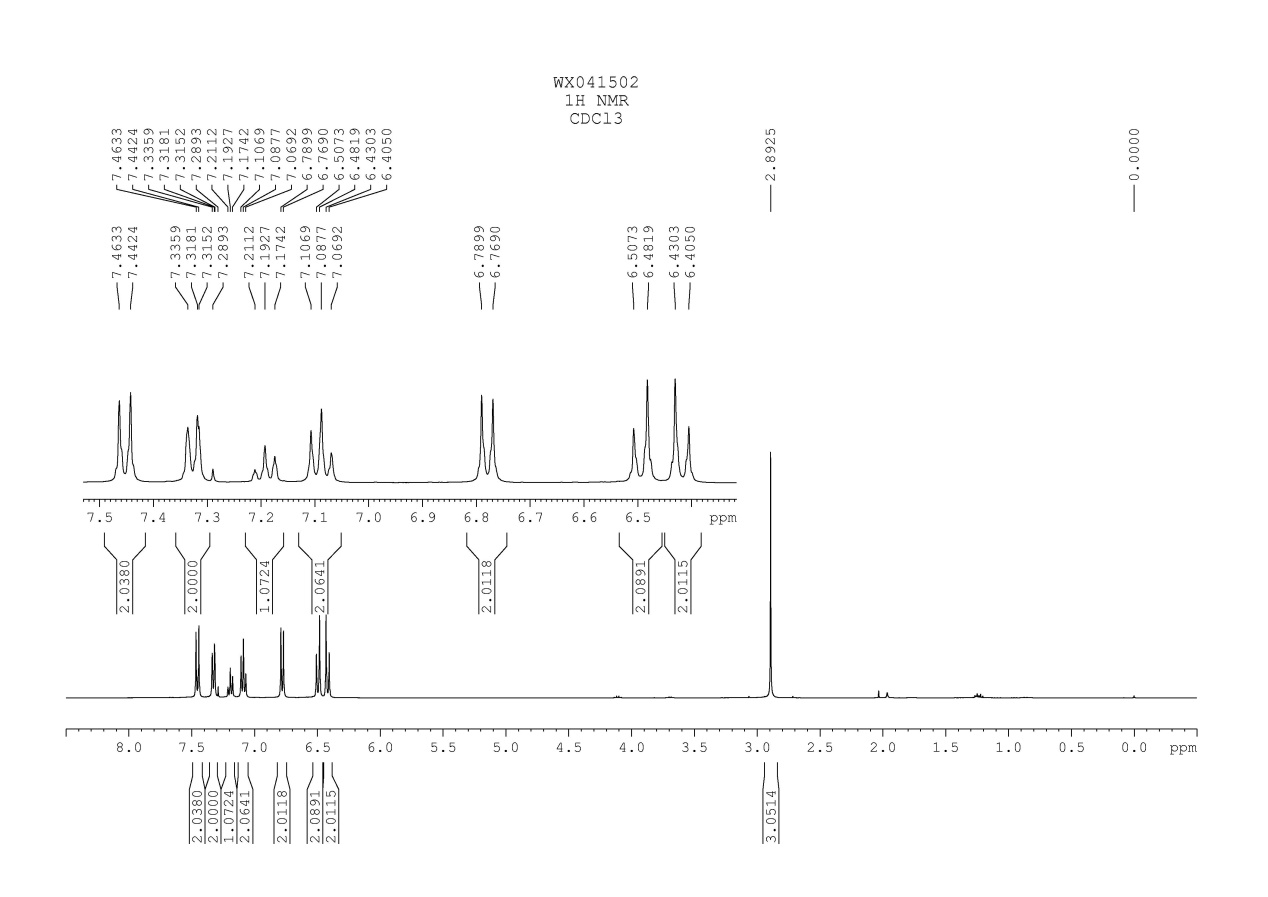
**

**Fig. 16** 1H NMR spectrum of compound **3h**

**
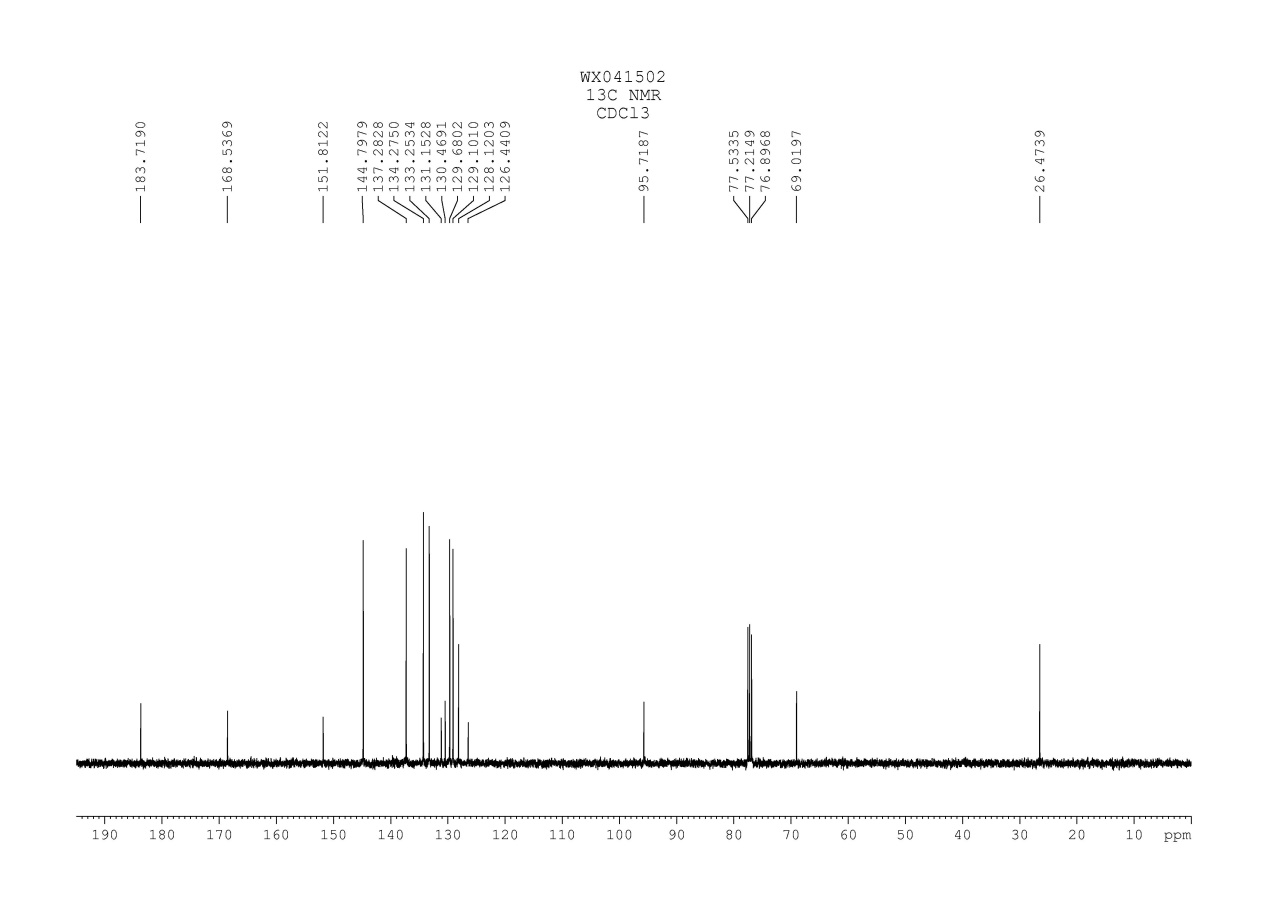
**

**Fig. 17** 13C NMR spectrum of compound **3h**

**
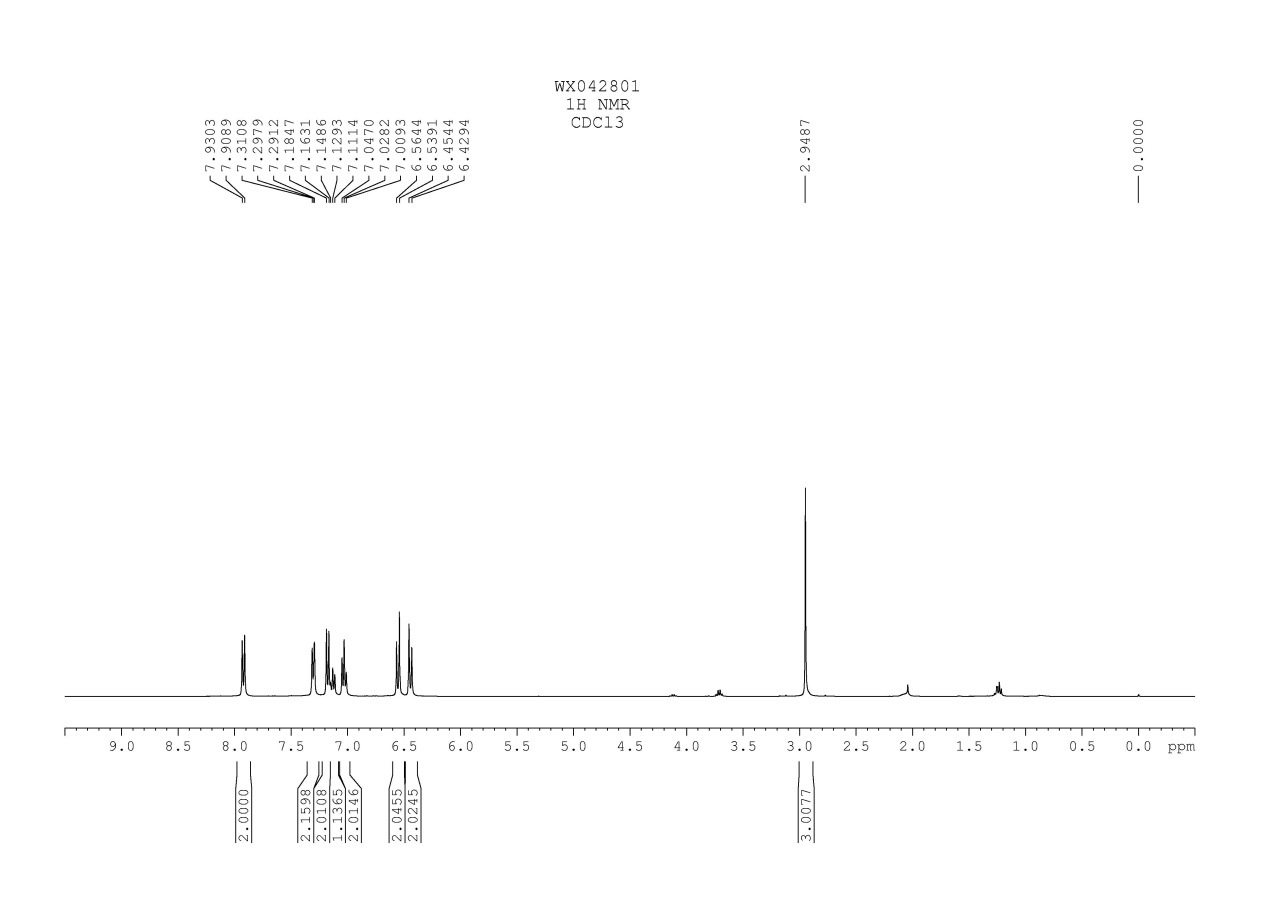
**

**Fig. 18** 1H NMR spectrum of compound **3i**

**
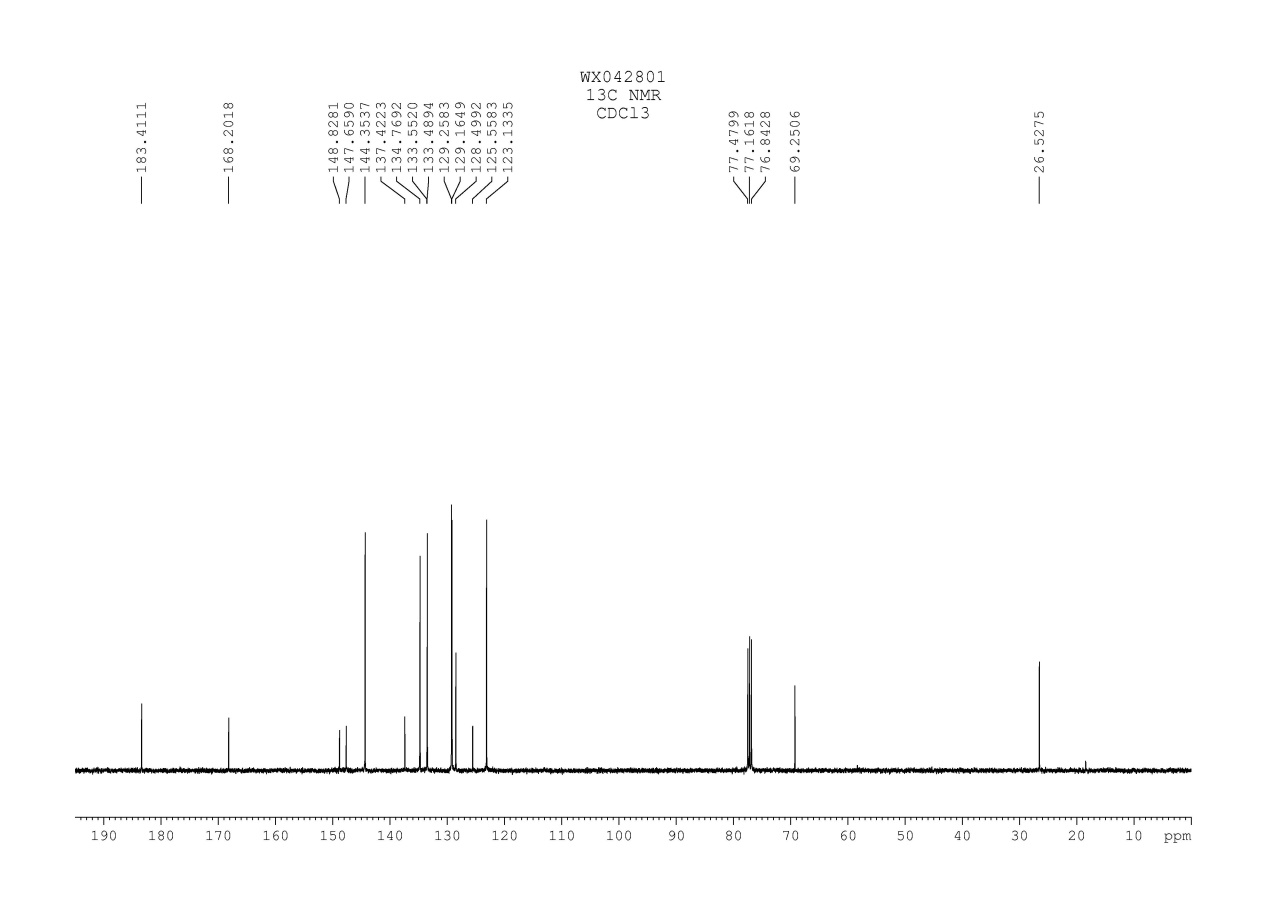
**

**Fig. 19** 13C NMR spectrum of compound **3i**

**
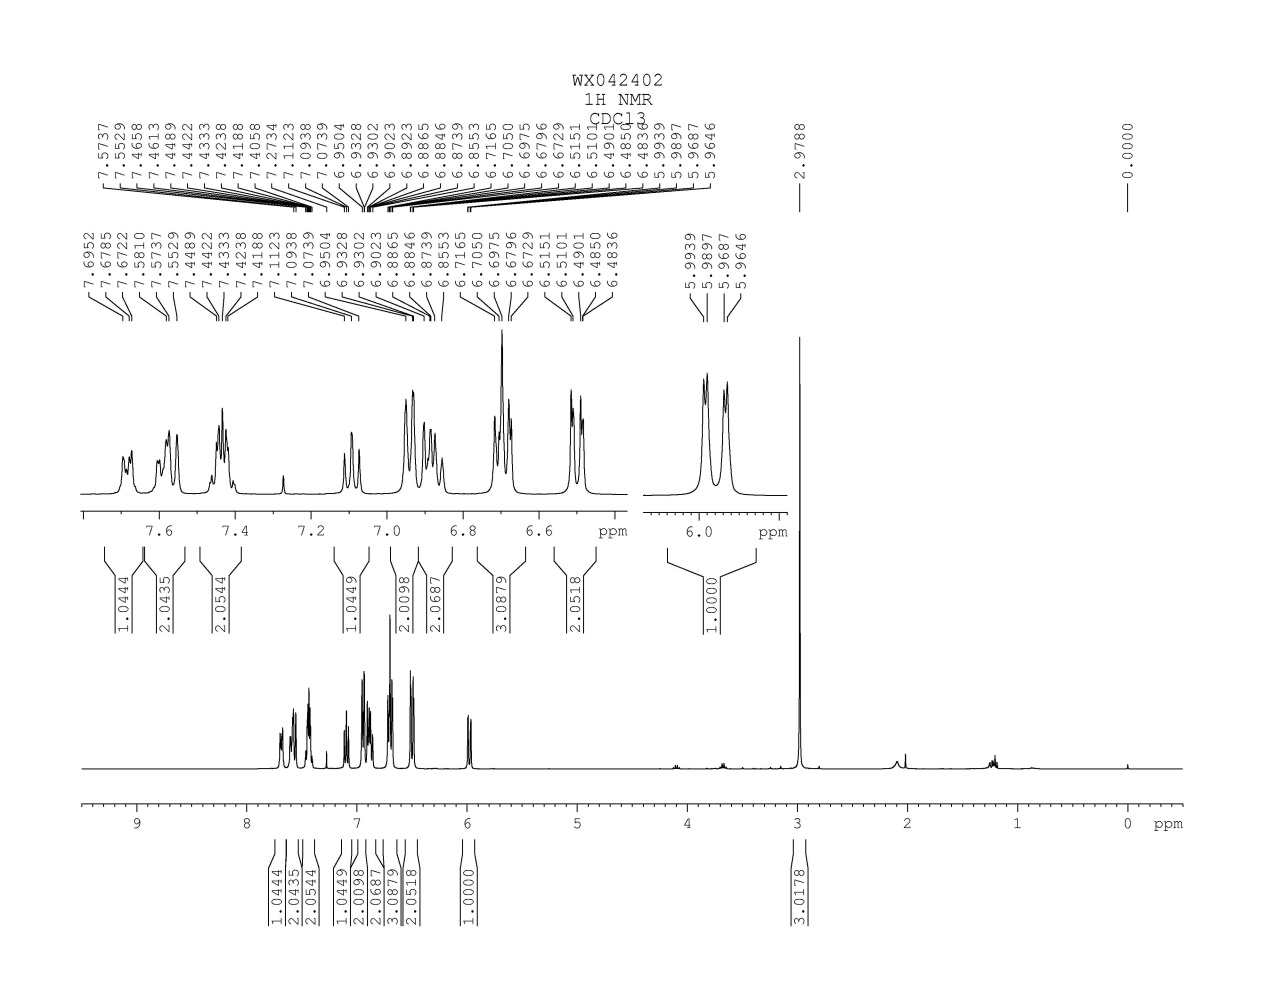
**

**Fig. 20** 1H NMR spectrum of compound **3j**

**
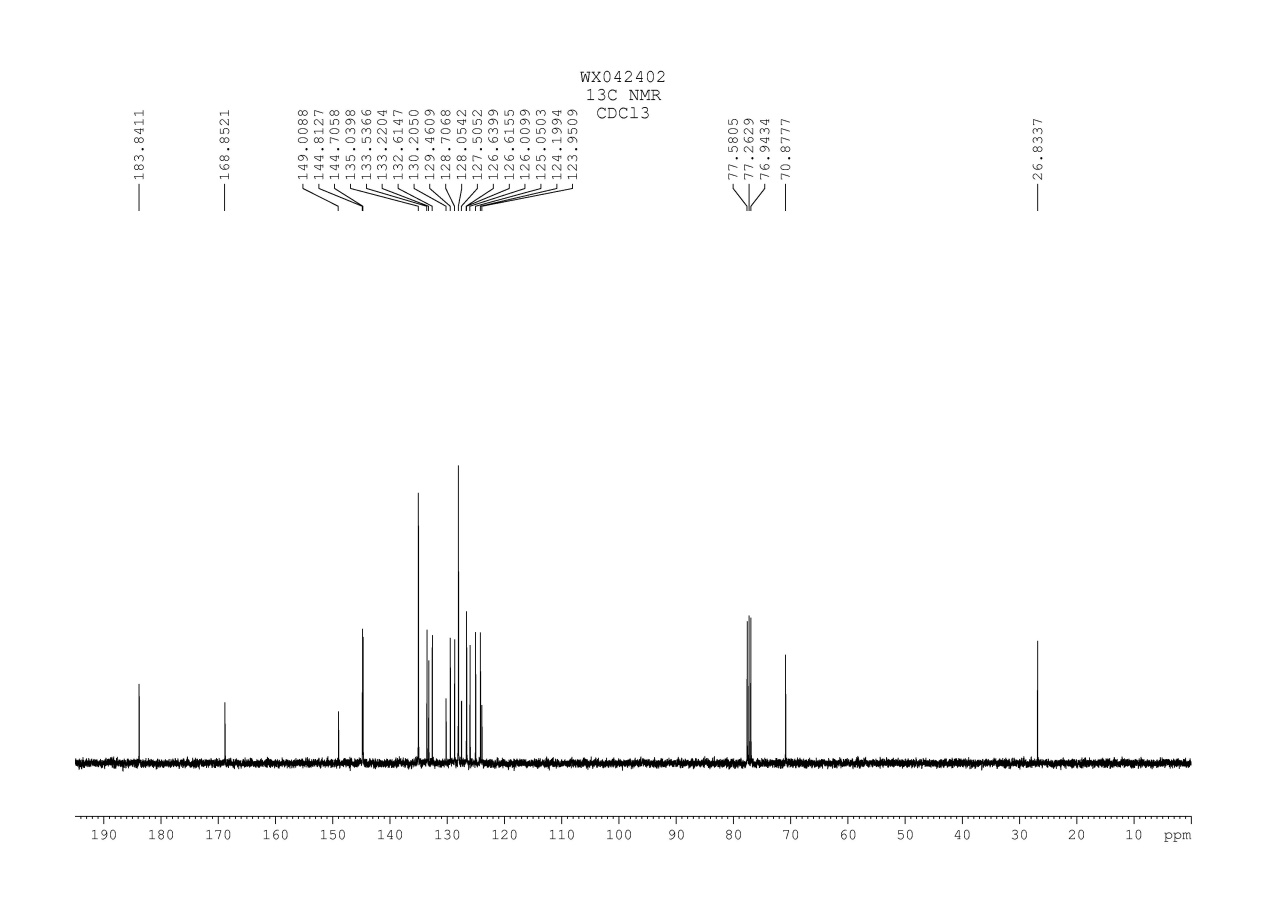
**

**Fig. 21** 13C NMR spectrum of compound **3j**

**
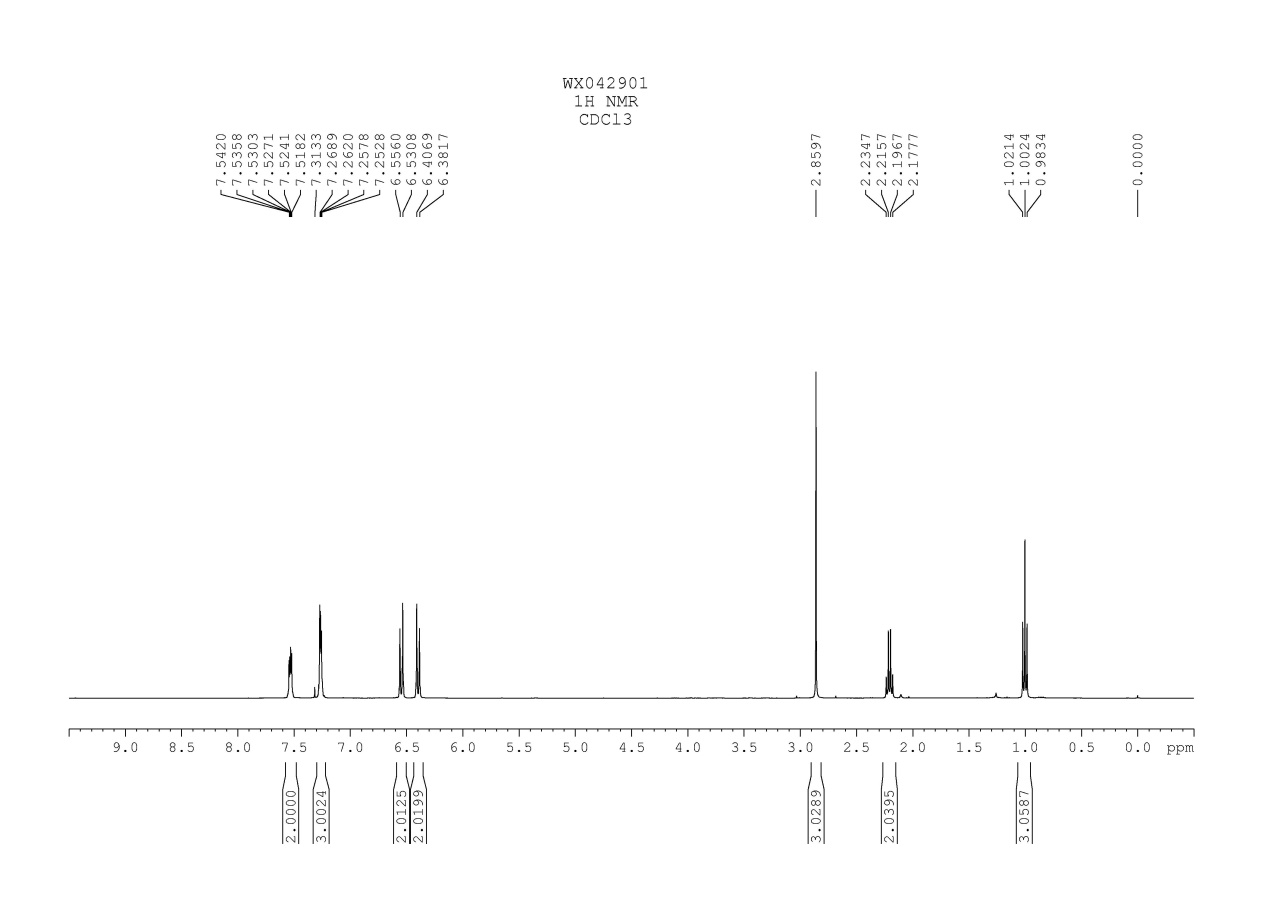
**

**Fig. 22** 1H NMR spectrum of compound **3k**

**
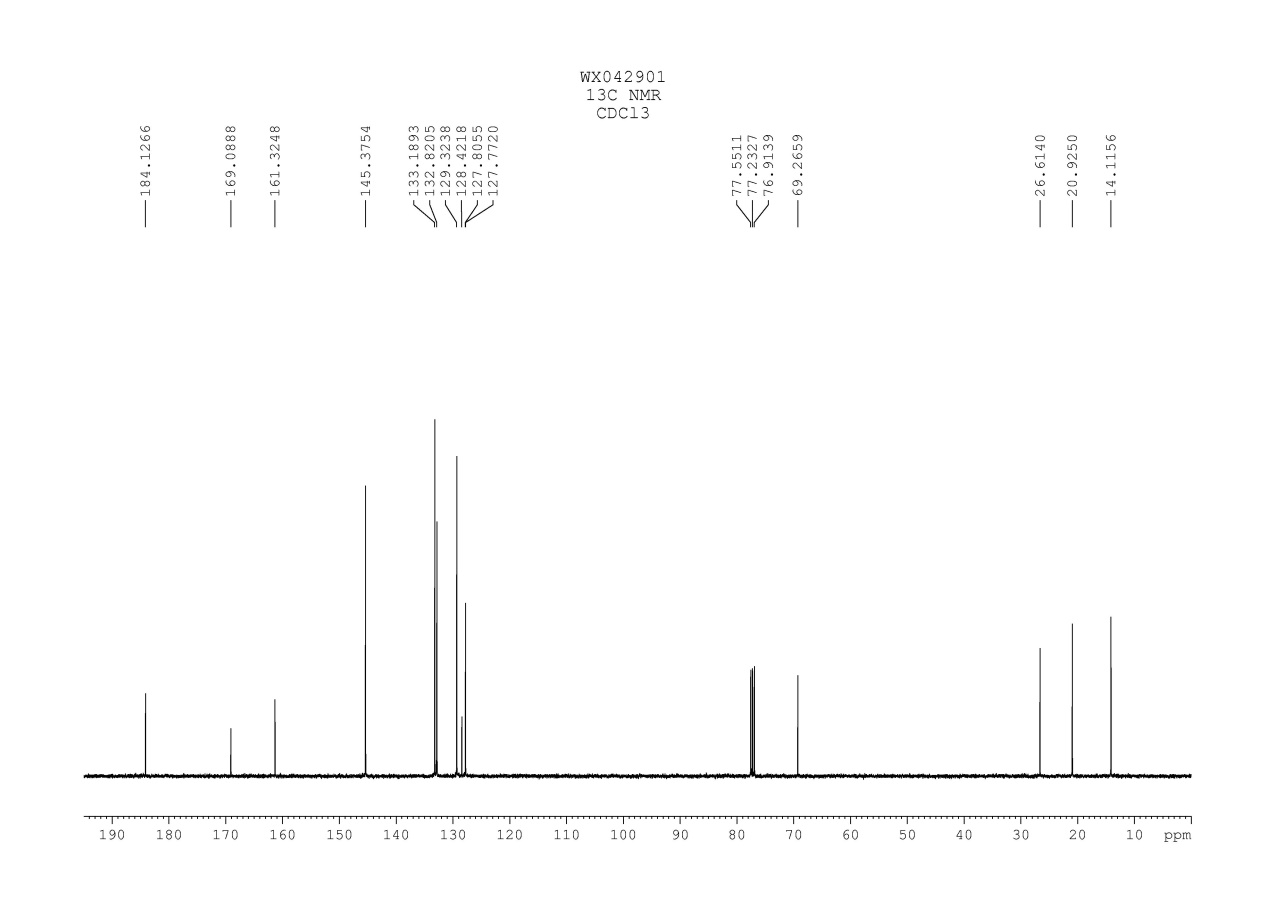
**

**Fig. 23** 13C NMR spectrum of compound **3k**

**
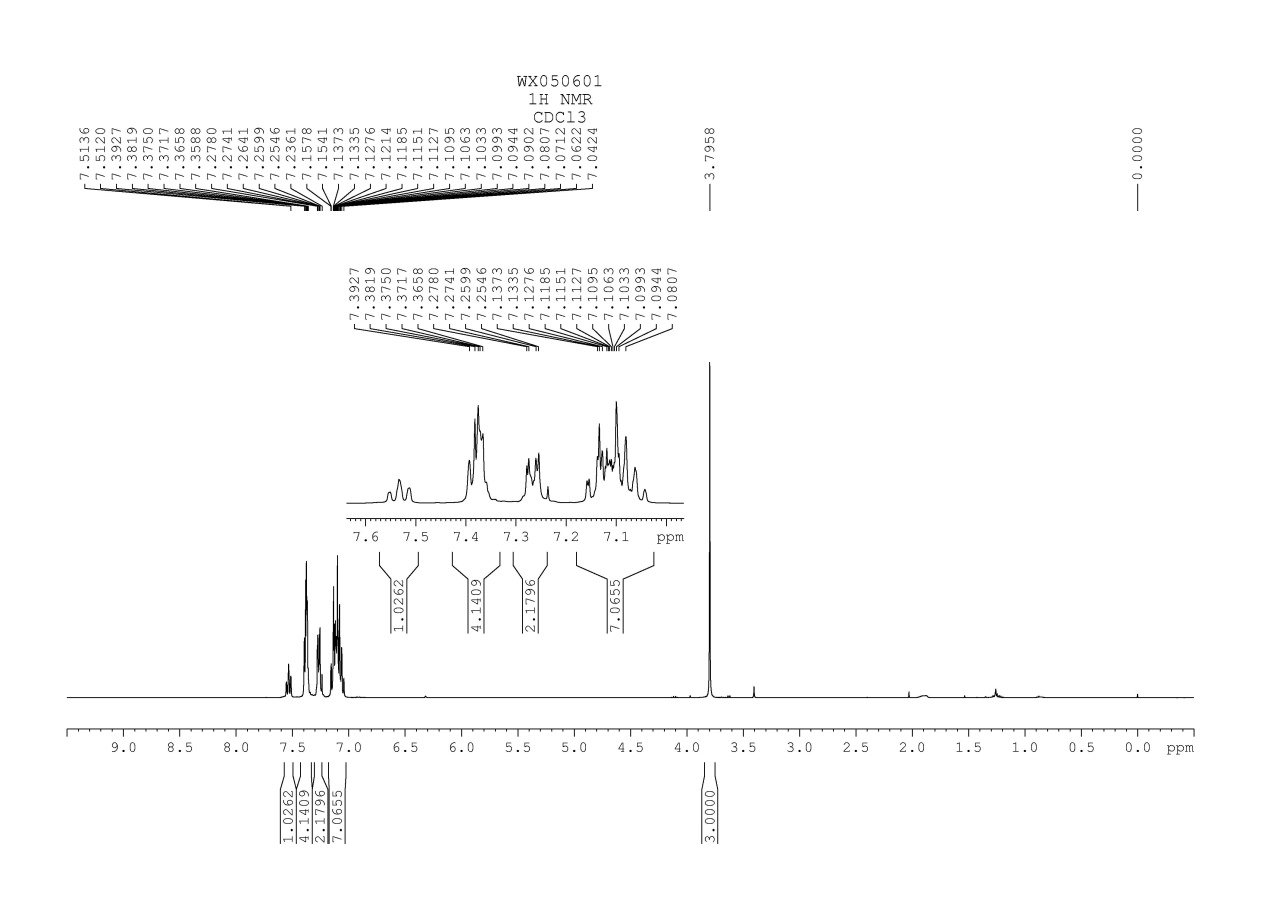
**

**Fig. 24** 1H NMR spectrum of compound **3l**

**
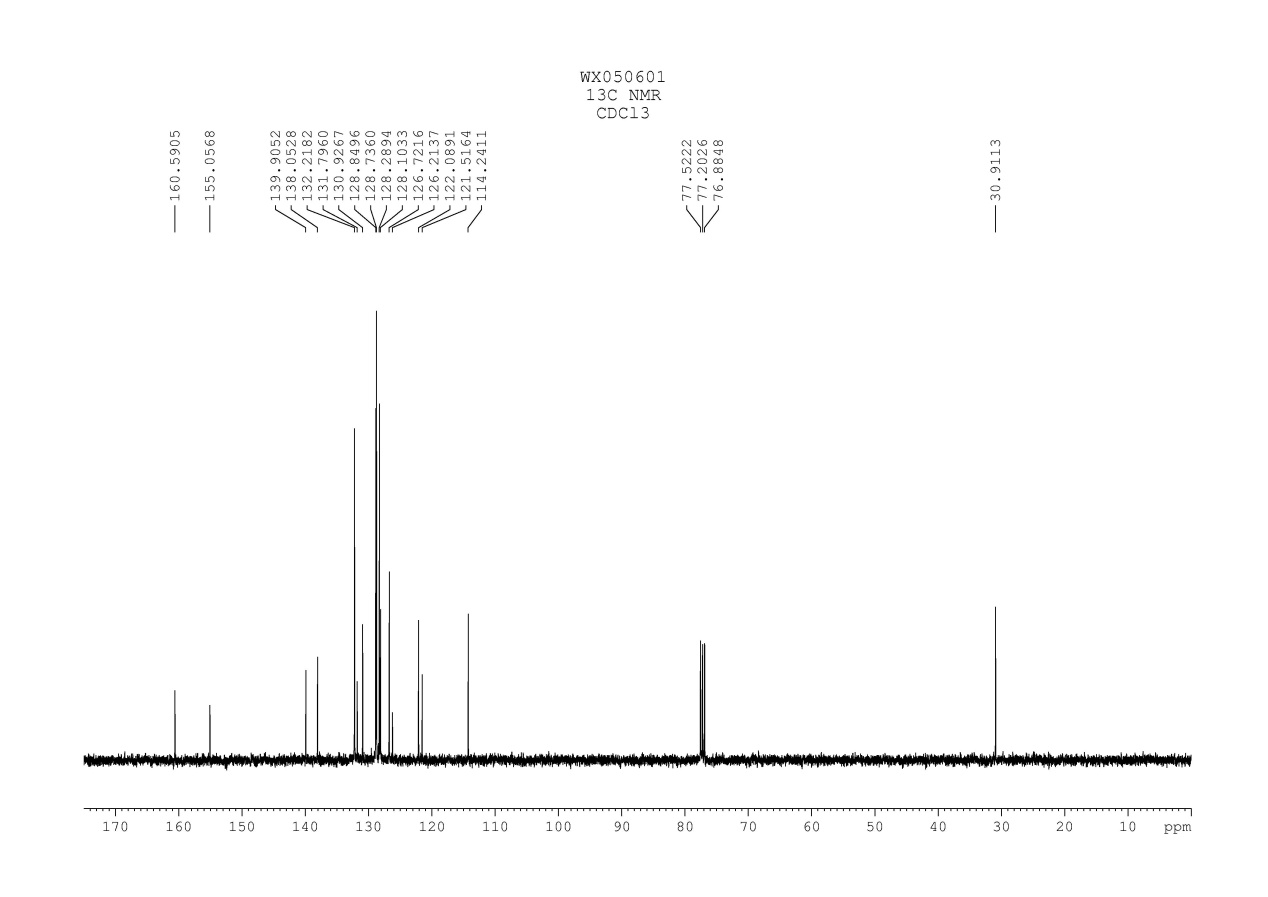
**

**Fig. 25** 13C NMR spectrum of compound **3l**

**
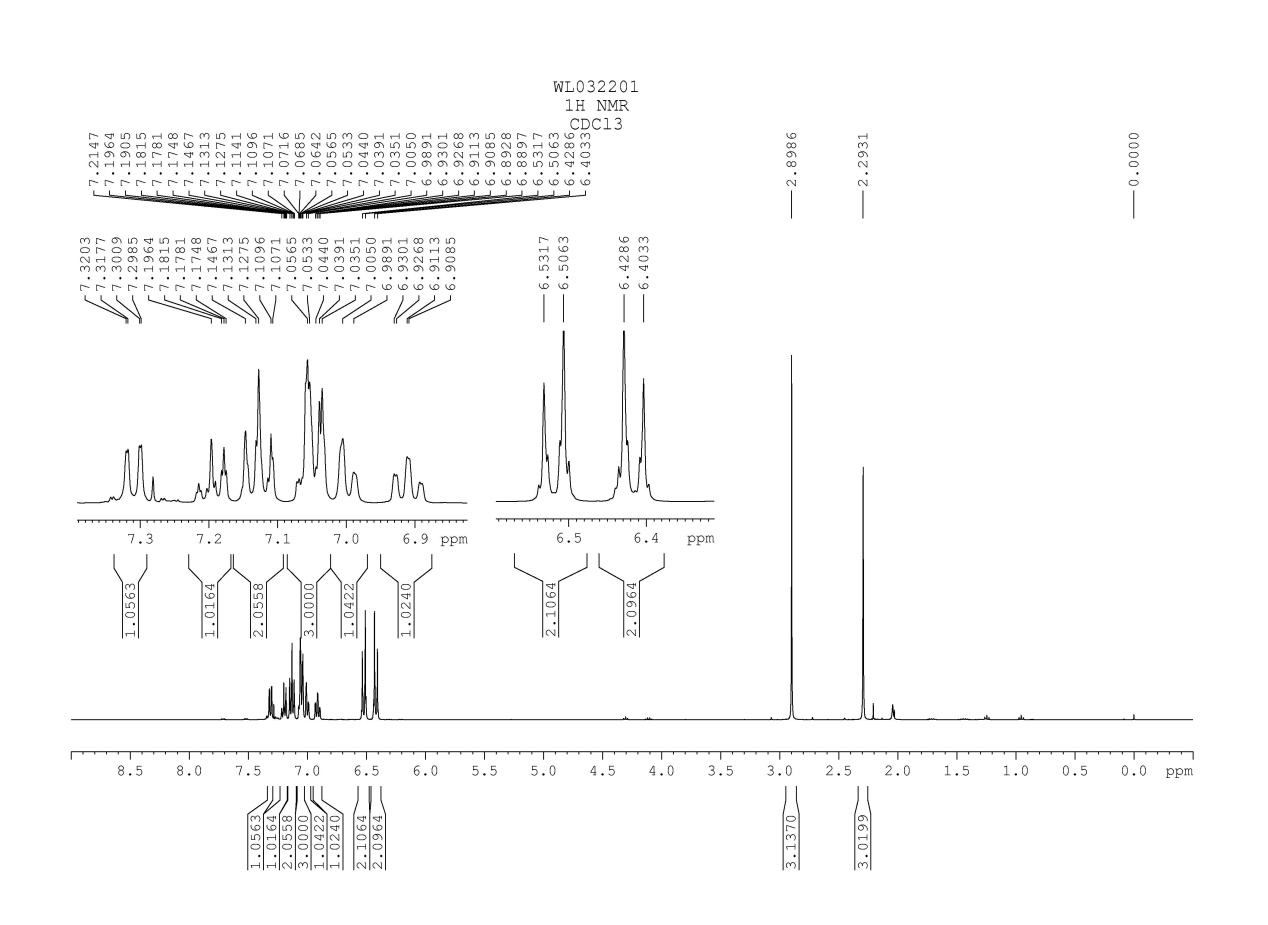
**

**Fig. 26** 1H NMR spectrum of compound **3m**

**
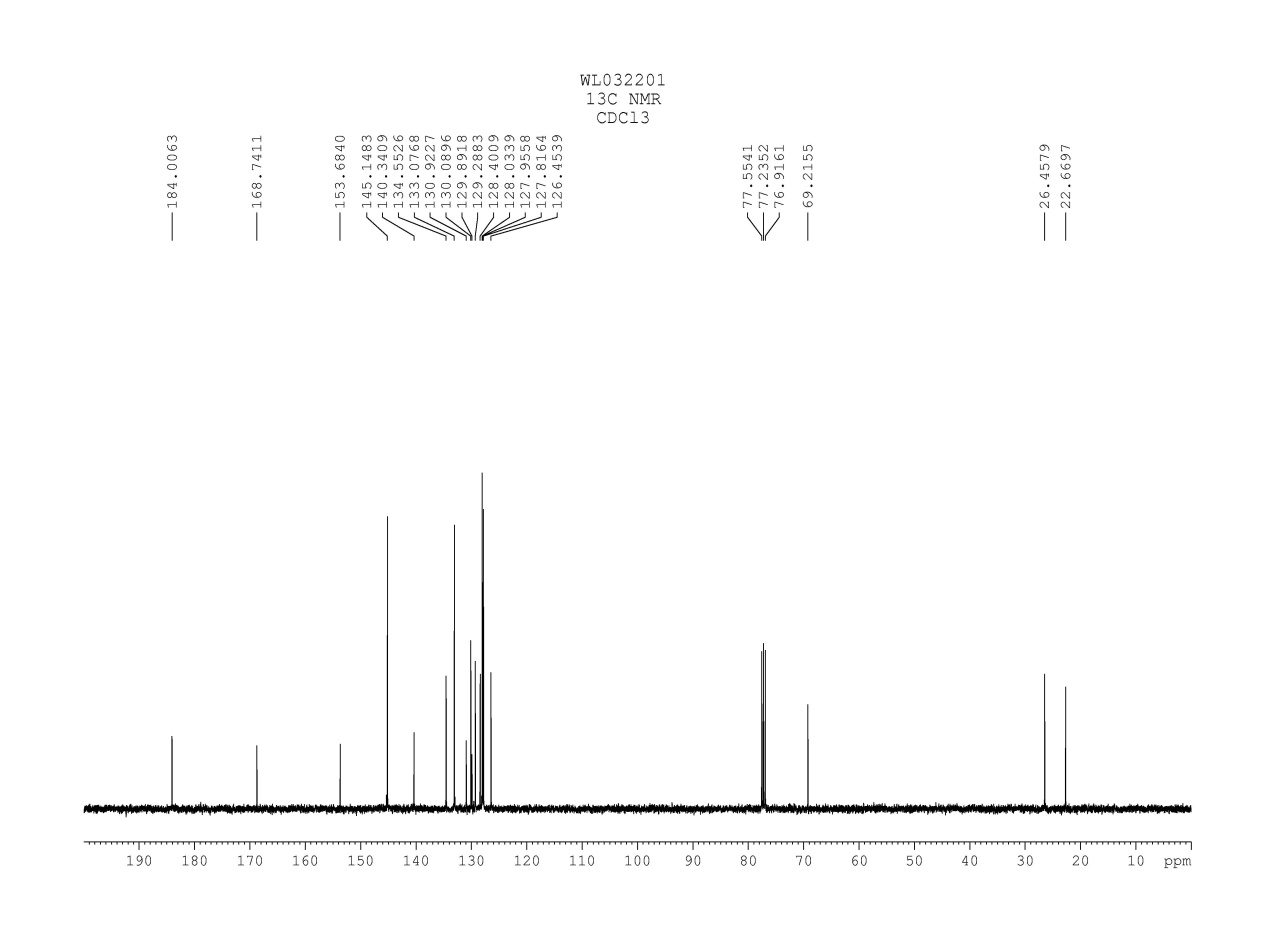
**

**Fig. 27** 13C NMR spectrum of compound **3m**

**
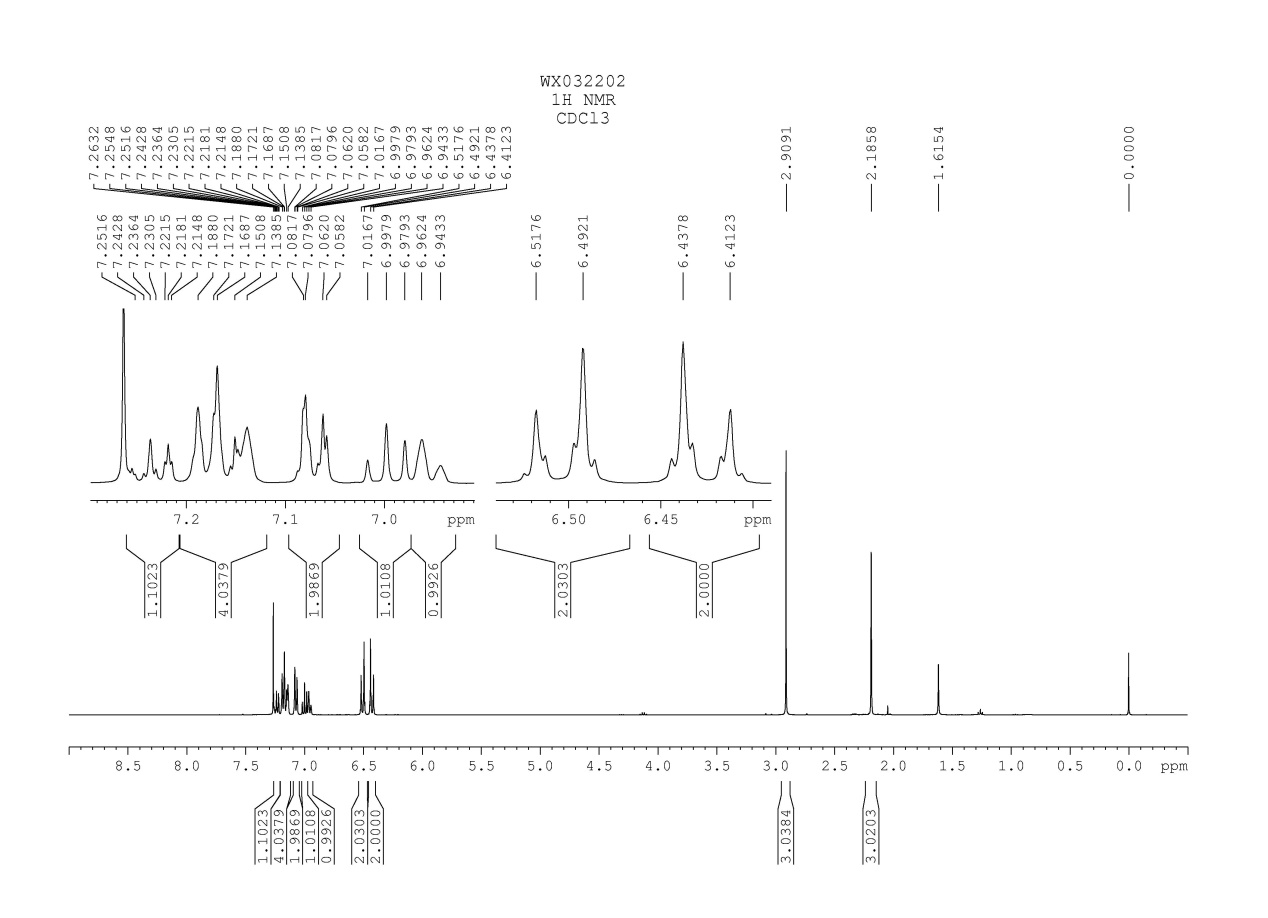
**

**Fig. 28** 1H NMR spectrum of compound **3n**

**
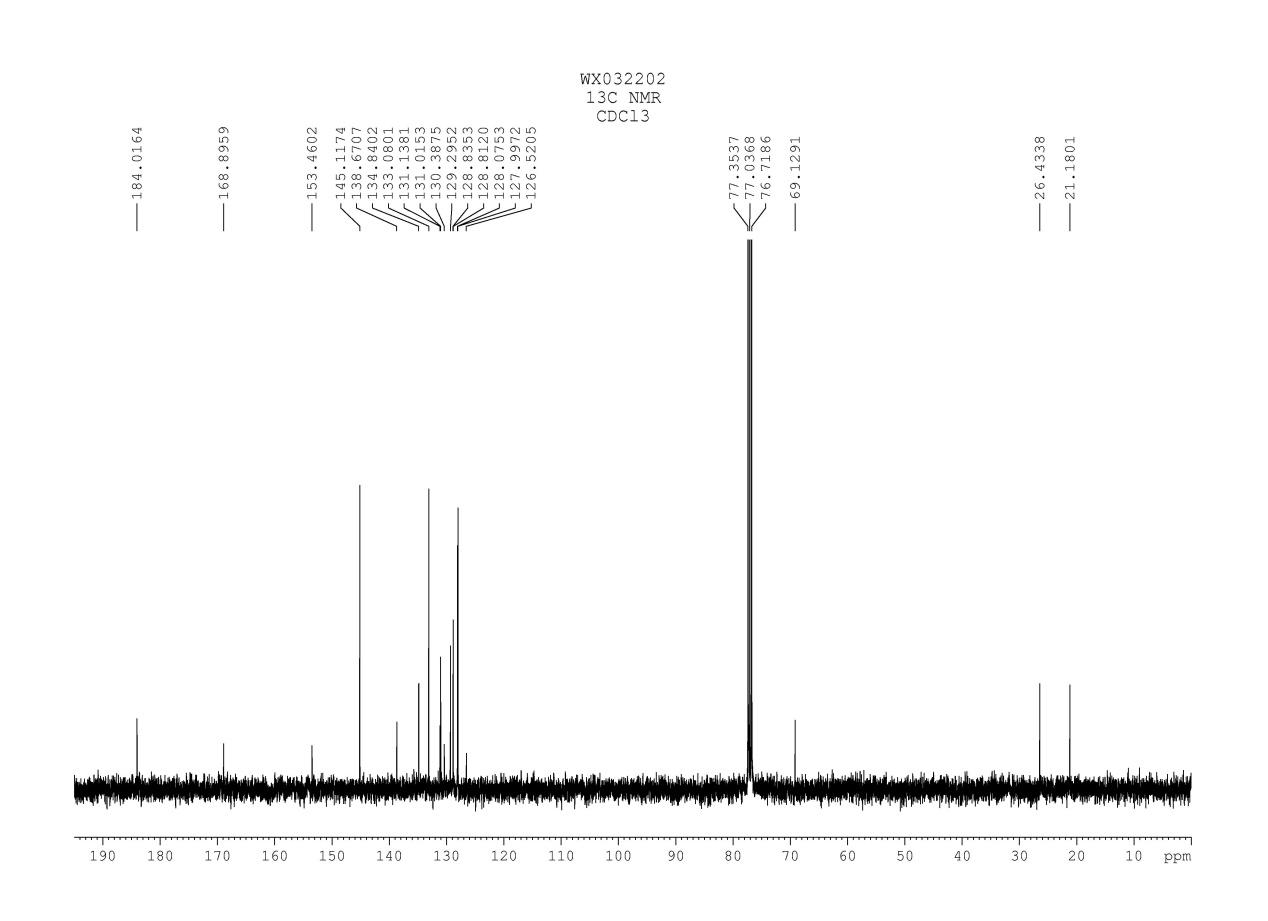
**

**Fig. 29** 13C NMR spectrum of compound **3n**

**
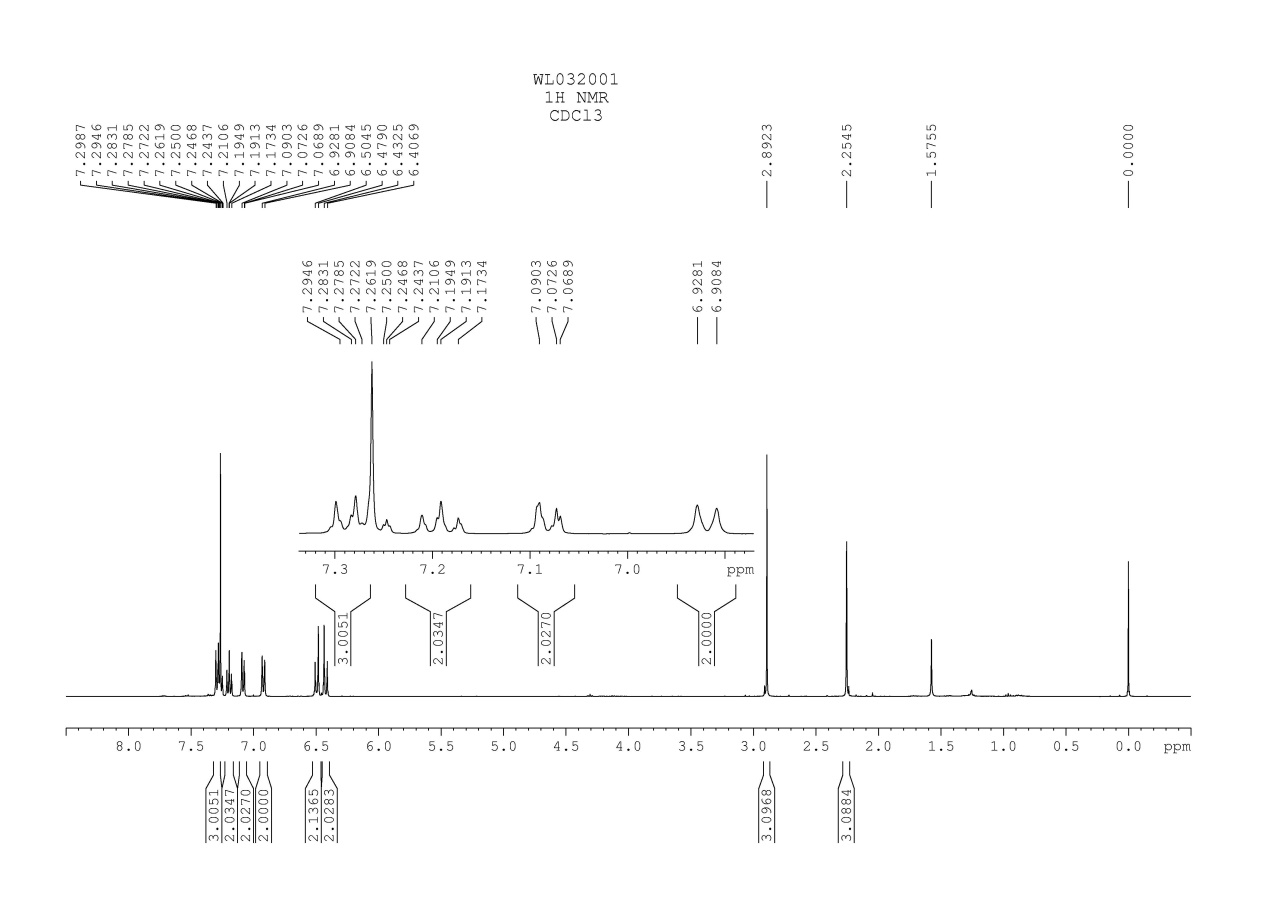
**

**Fig. 30** 1H NMR spectrum of compound **3o**

**
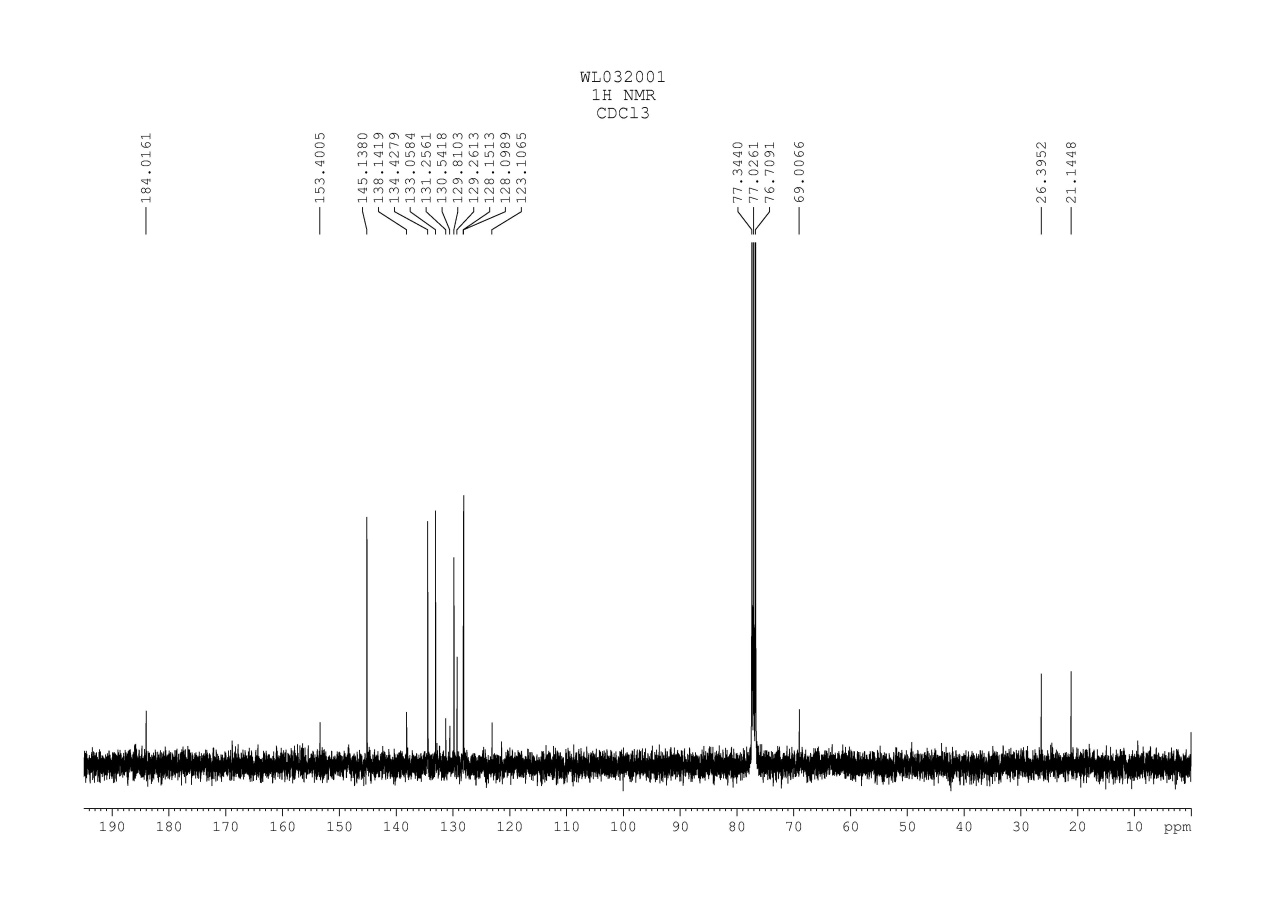
**

**Fig. 31** 13C NMR spectrum of compound **3o**

**
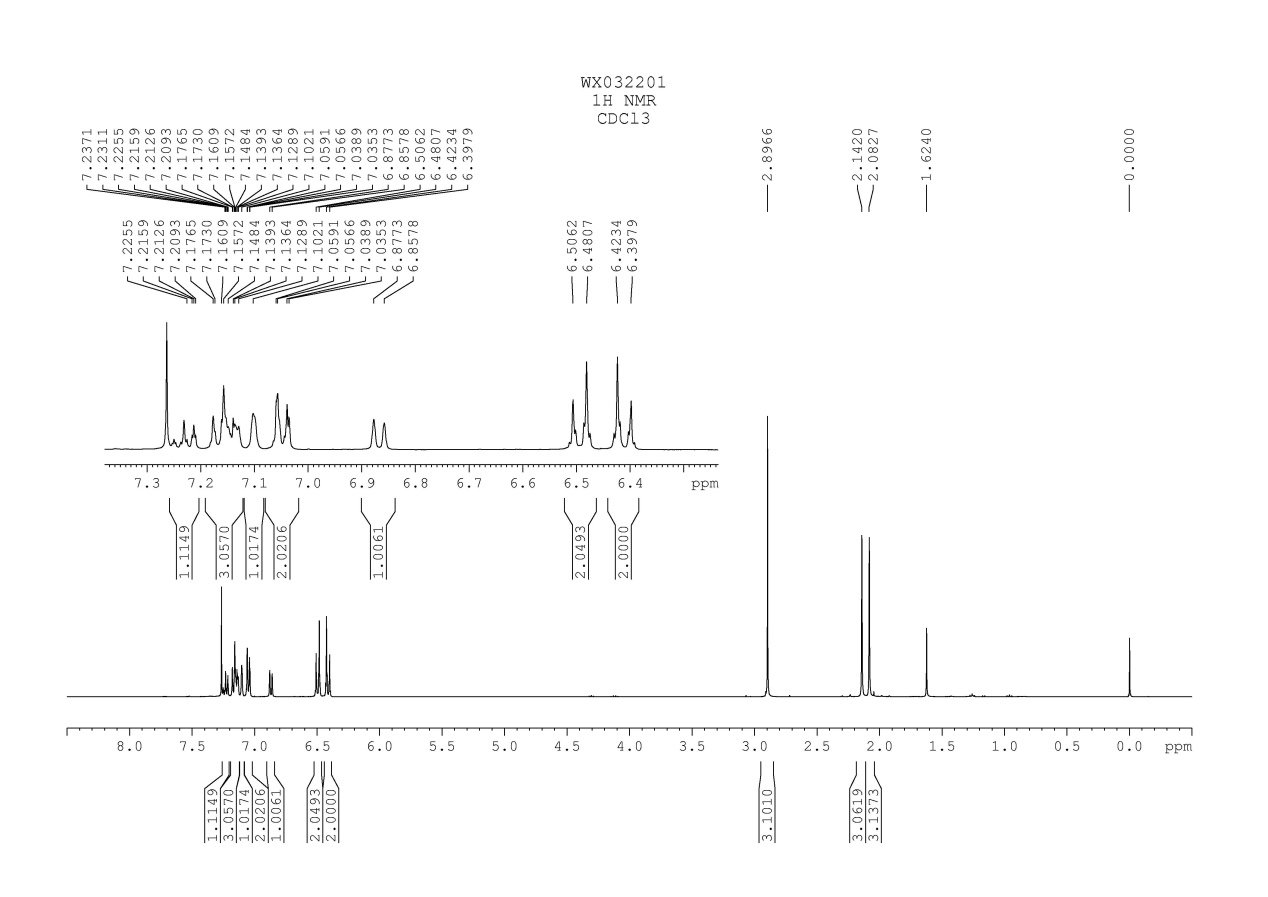
**

**Fig. 32** 1H NMR spectrum of compound **3p**

**
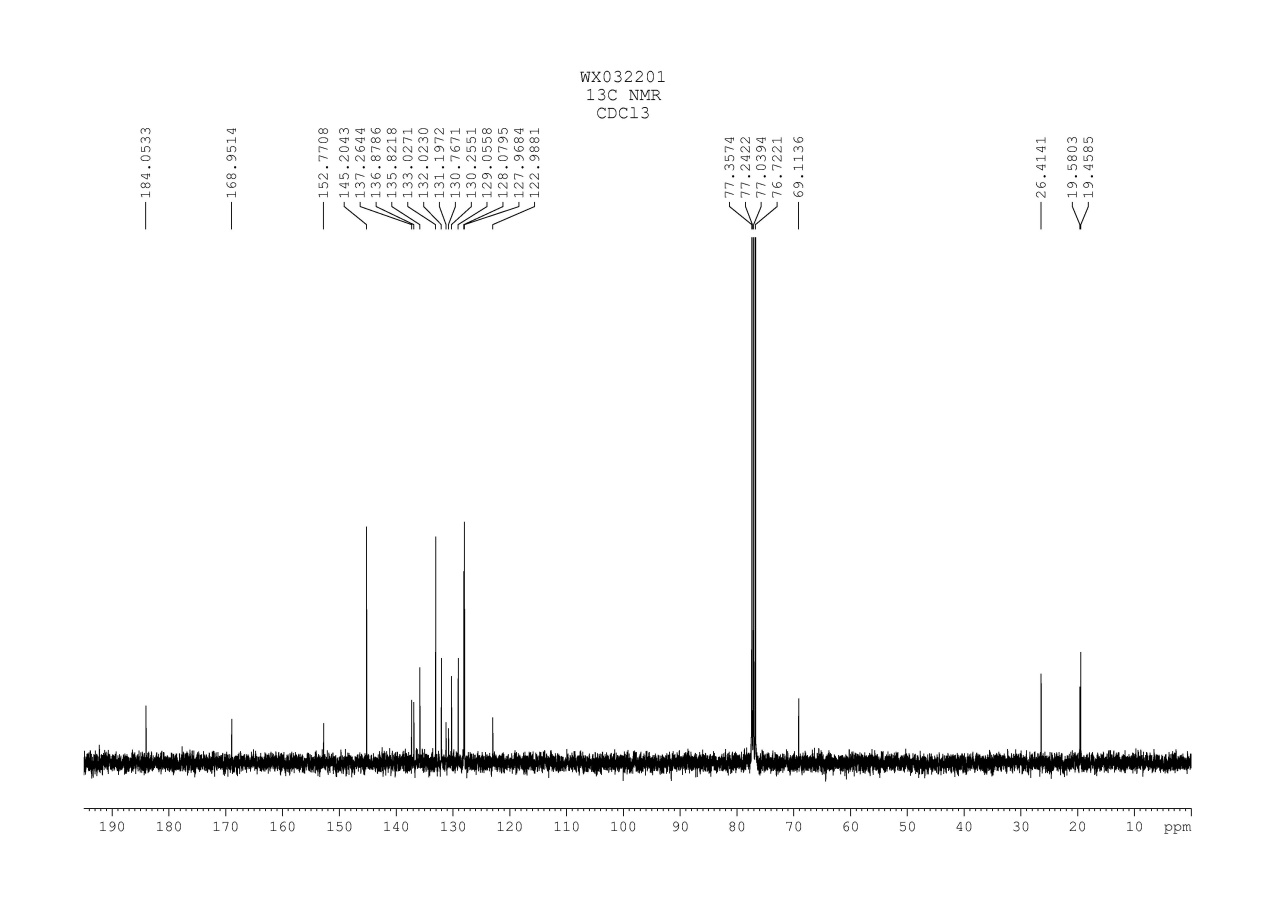
**

**Fig. 33** 13C NMR spectrum of compound **3p**

**
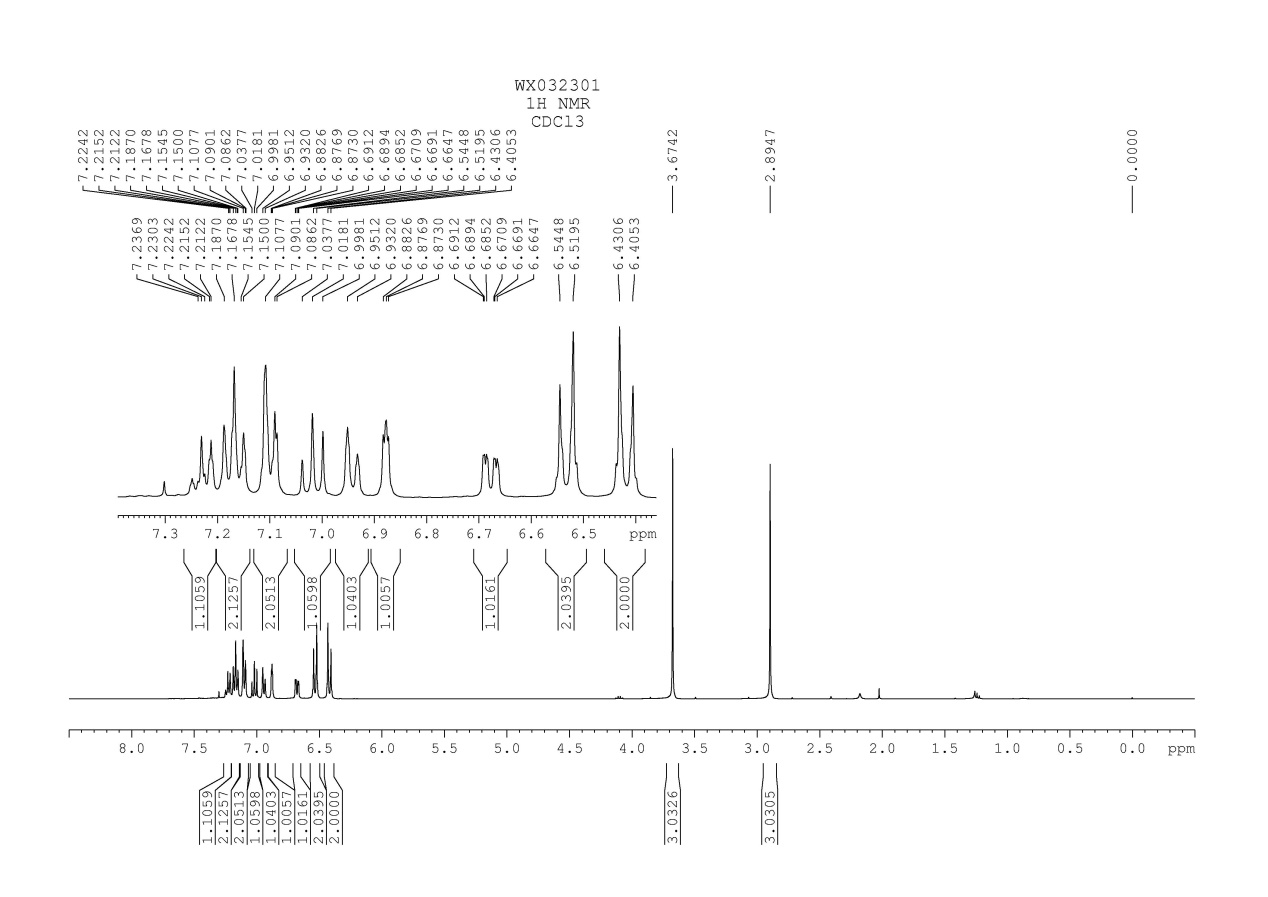
**

**Fig. 34** 1H NMR spectrum of compound **3q**

**
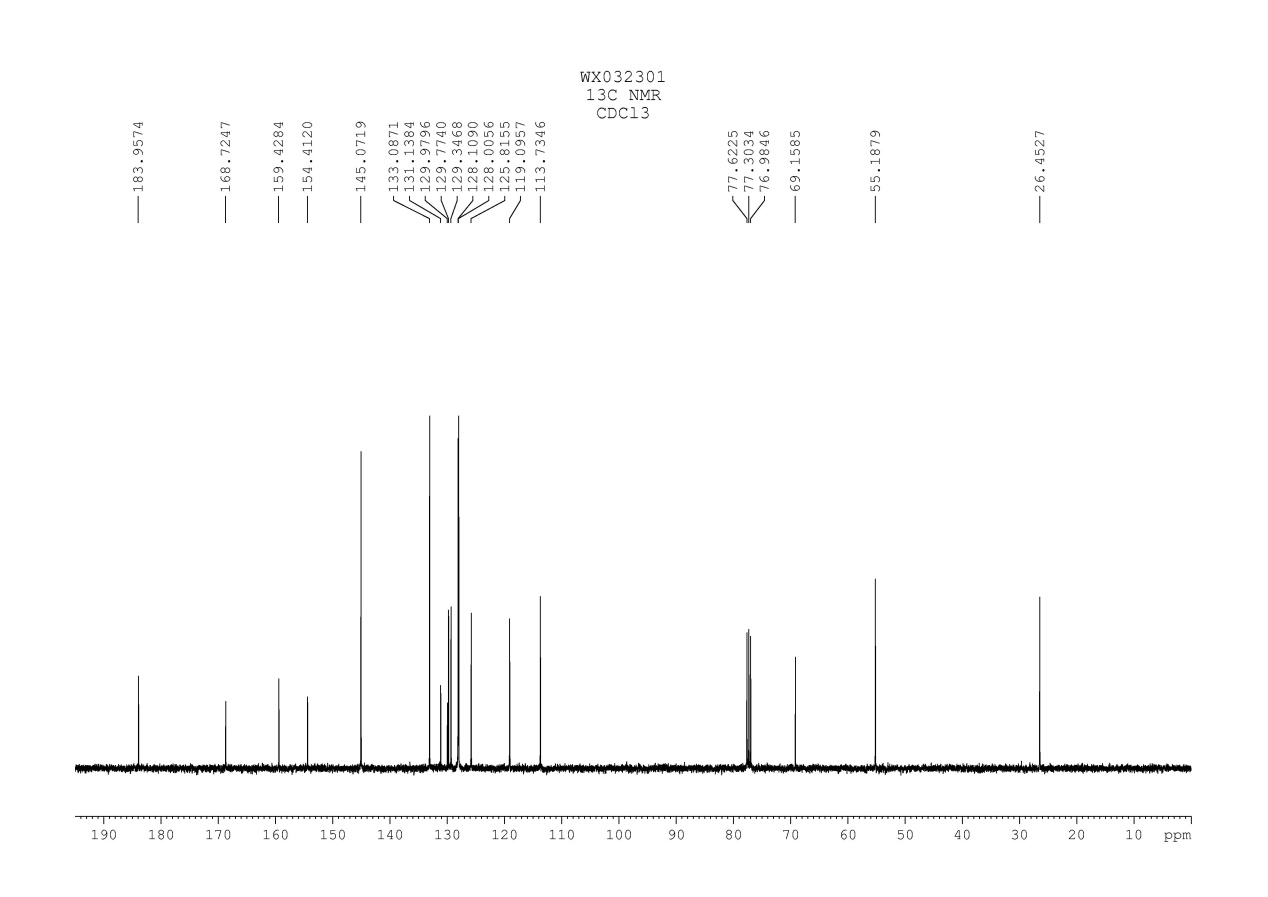
**

**Fig. 35** 13C NMR spectrum of compound **3q**

**
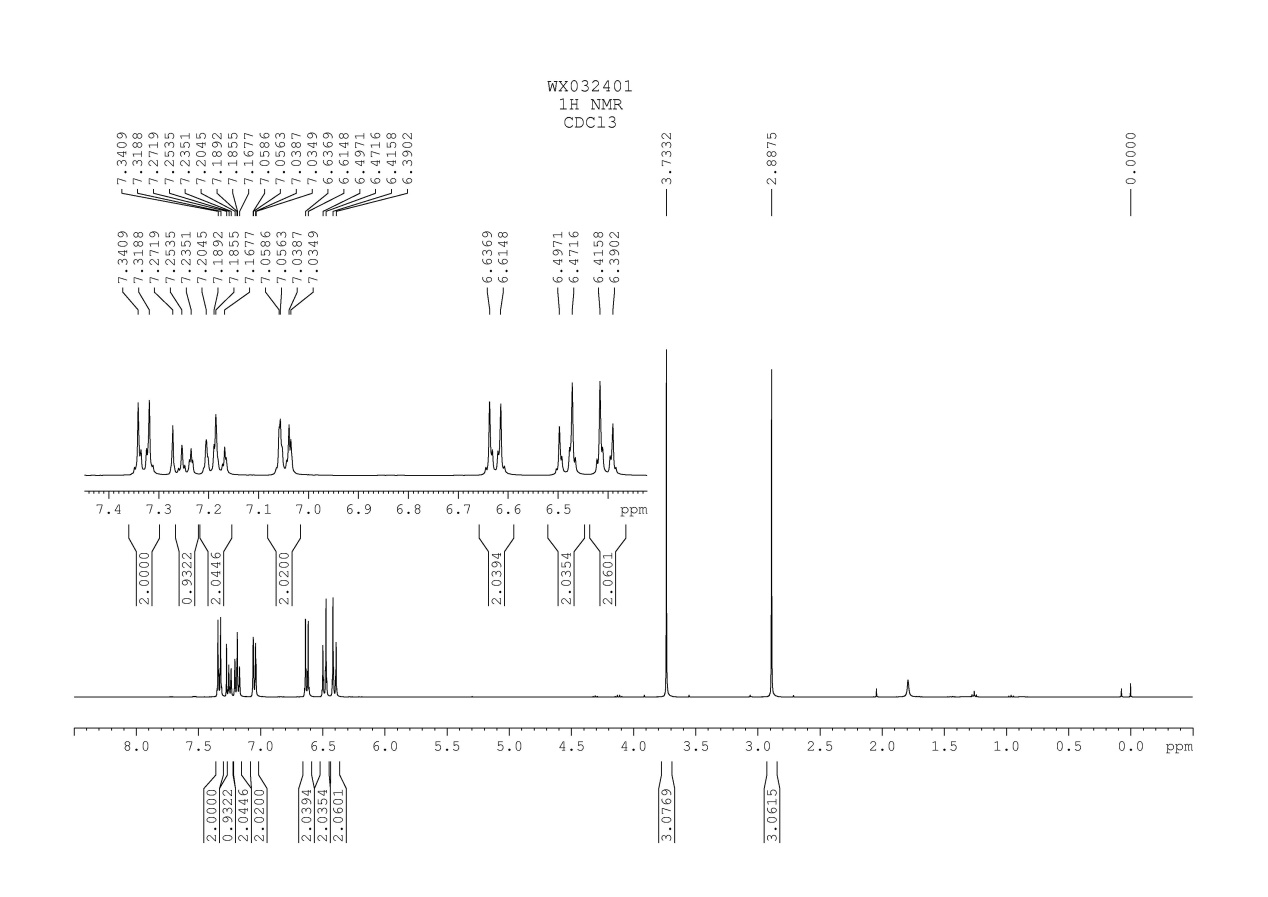
**

**Fig. 36** 1H NMR spectrum of compound **3r**

**
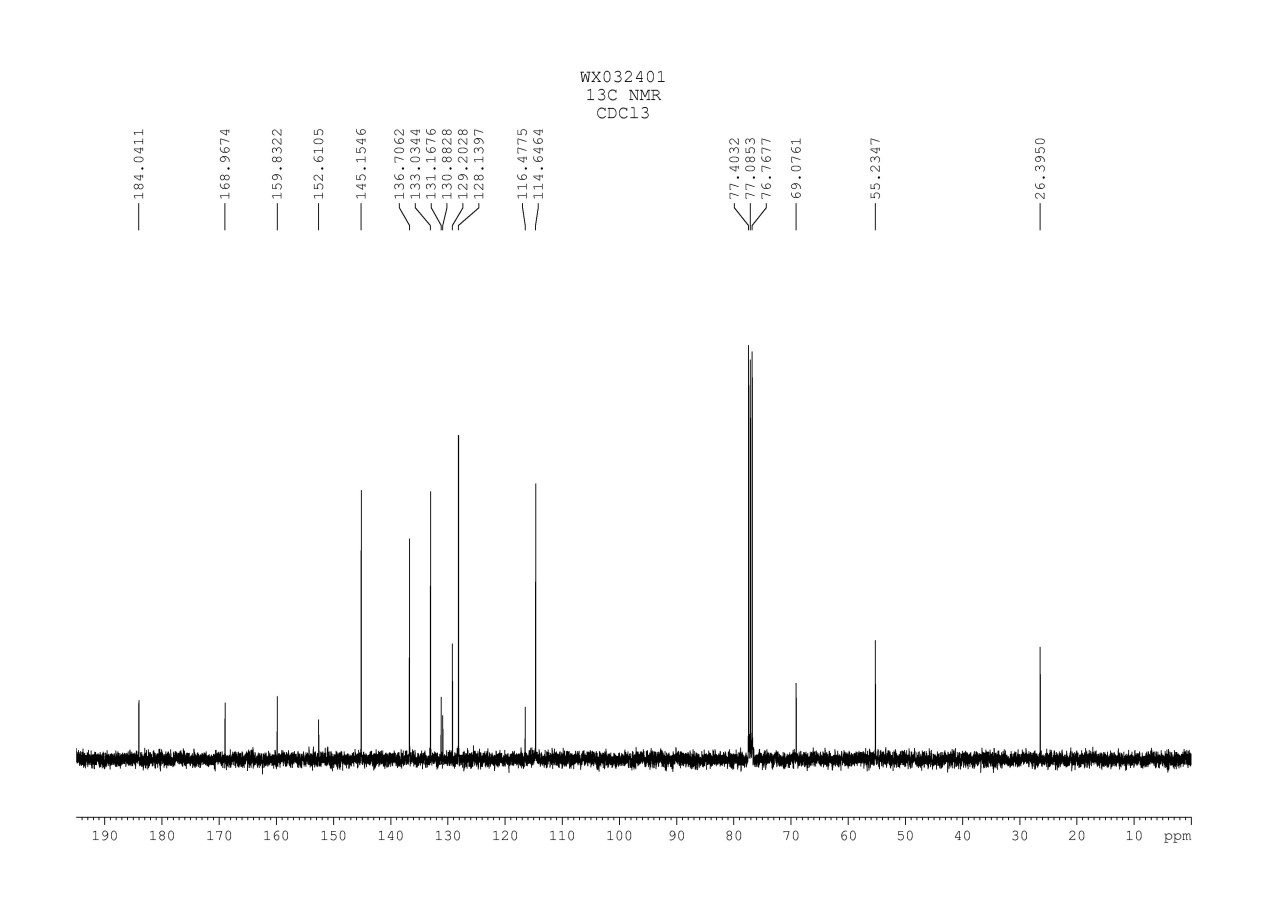
**

**Fig. 37** 13C NMR spectrum of compound **3r**

**
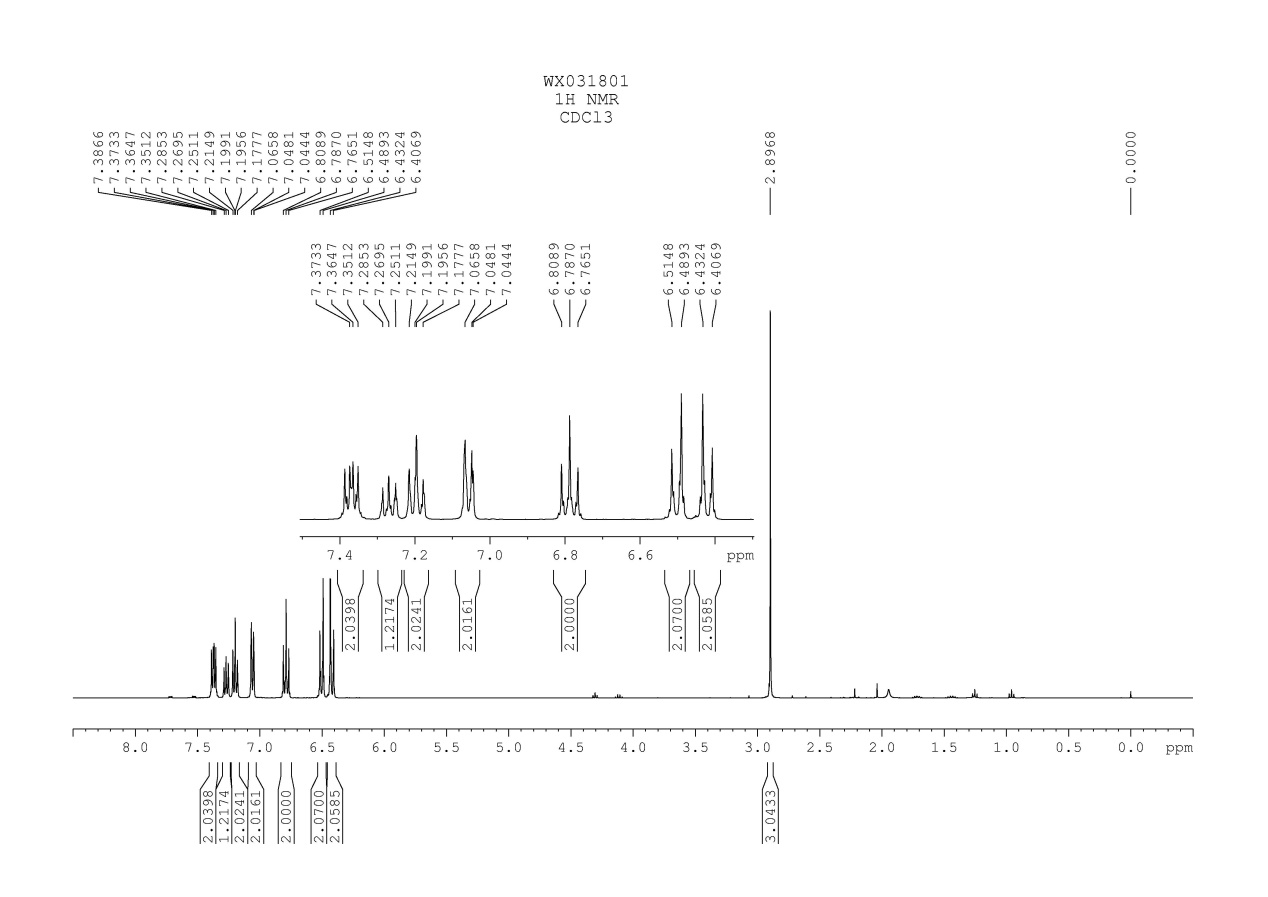
**

**Fig. 38** 1H NMR spectrum of compound **3s**

**
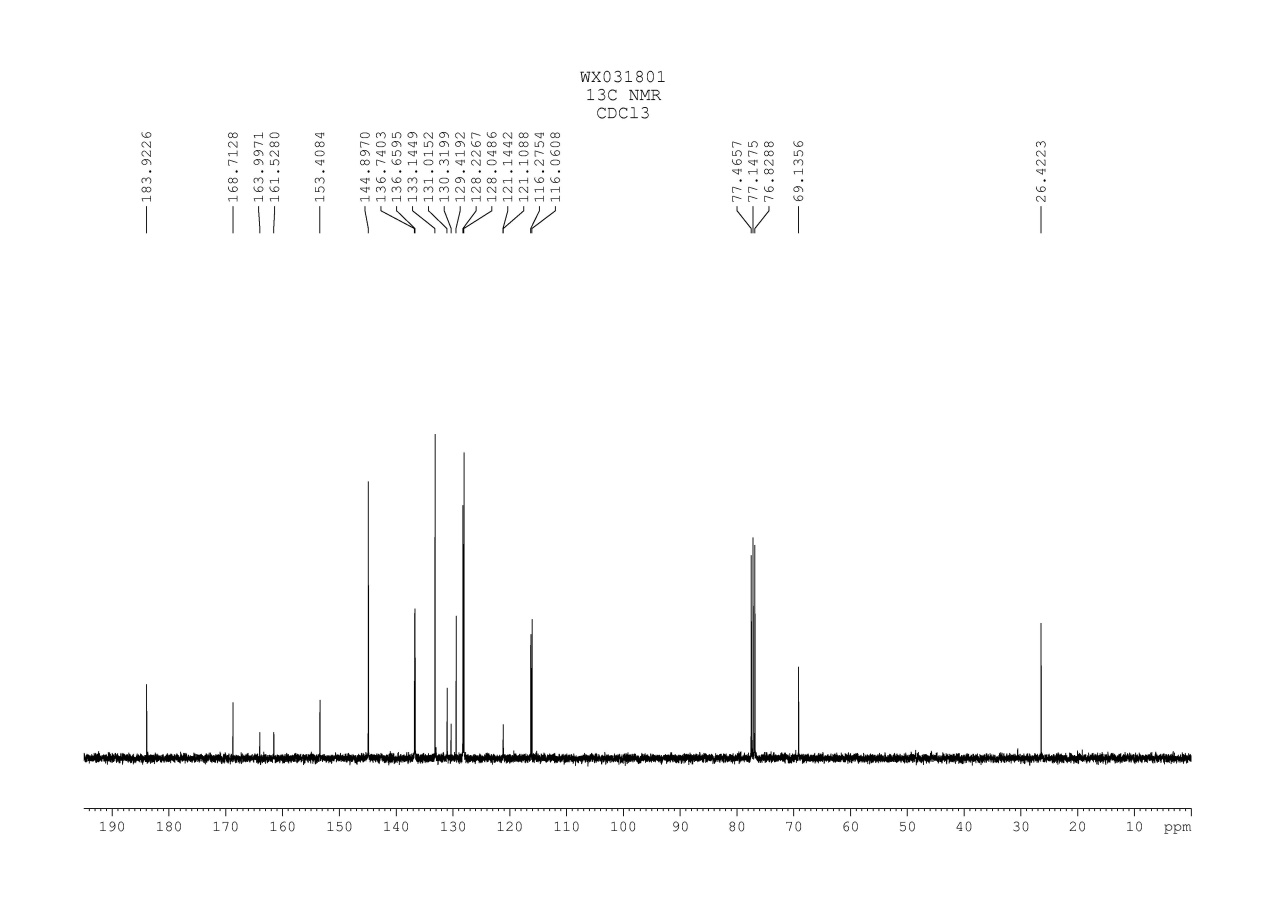
**

**Fig. 39** 13C NMR spectrum of compound **3s**

**
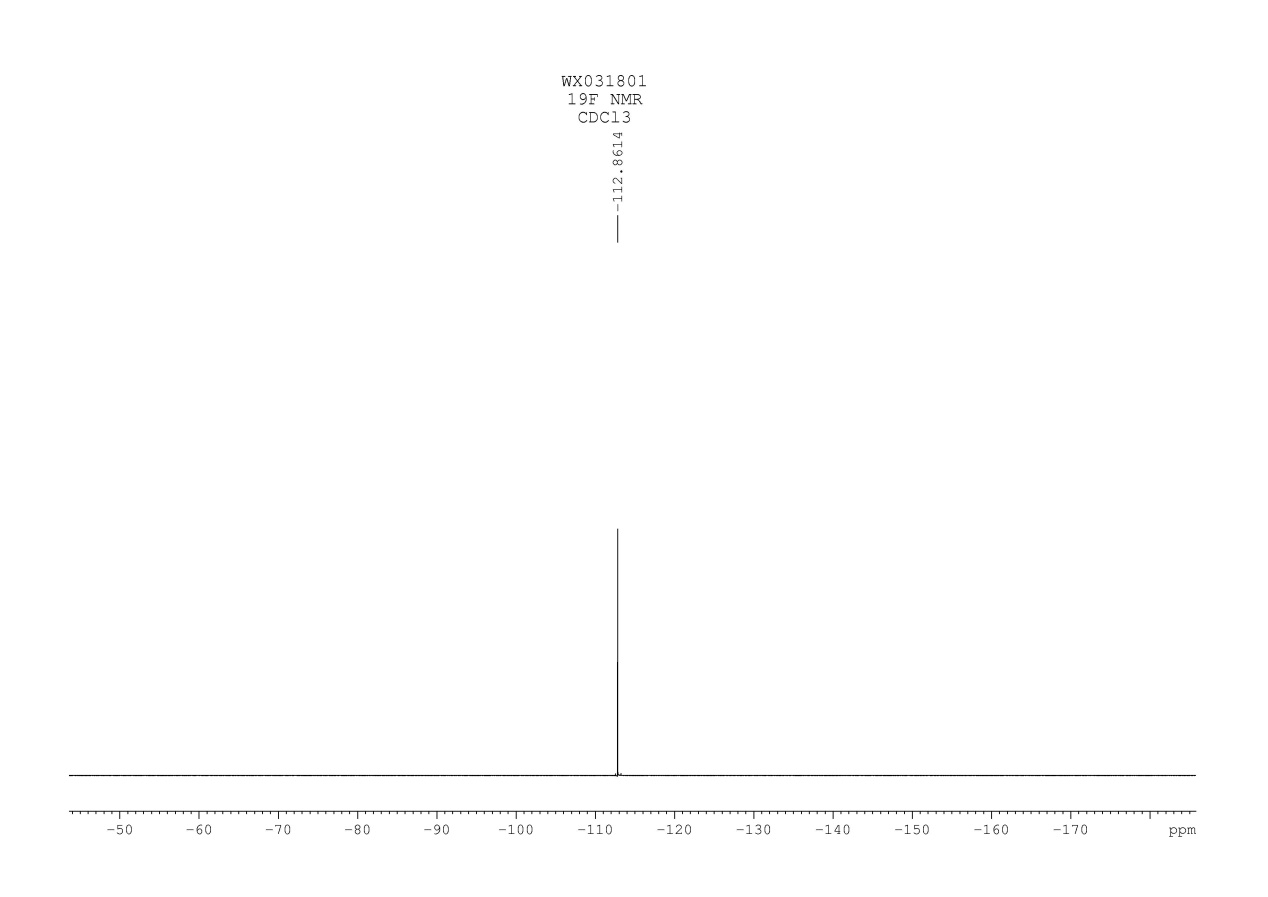
**

**Fig. 40** 19F NMR spectrum of compound **3s**

**
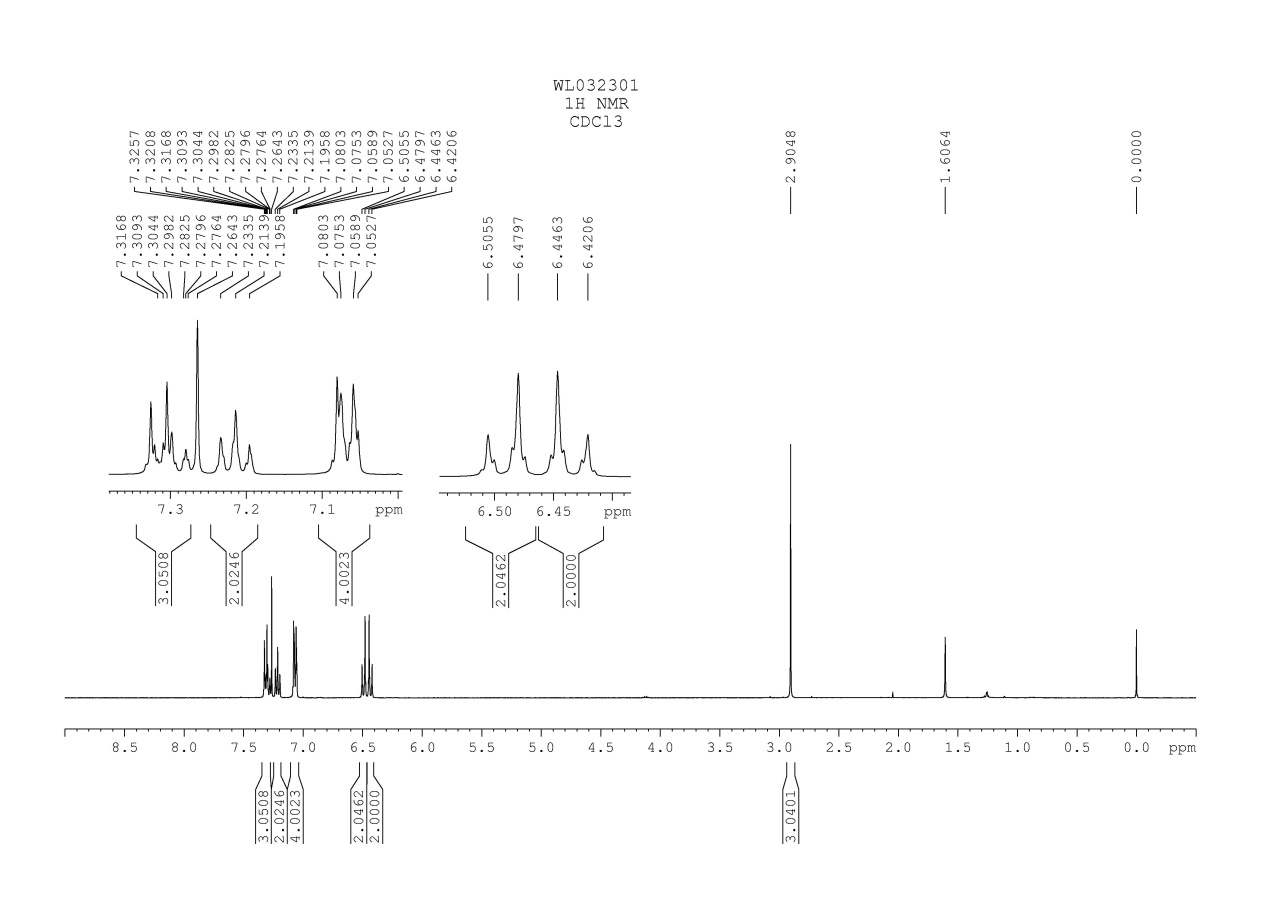
**

**Fig. 41** 1H NMR spectrum of compound **3t**

**
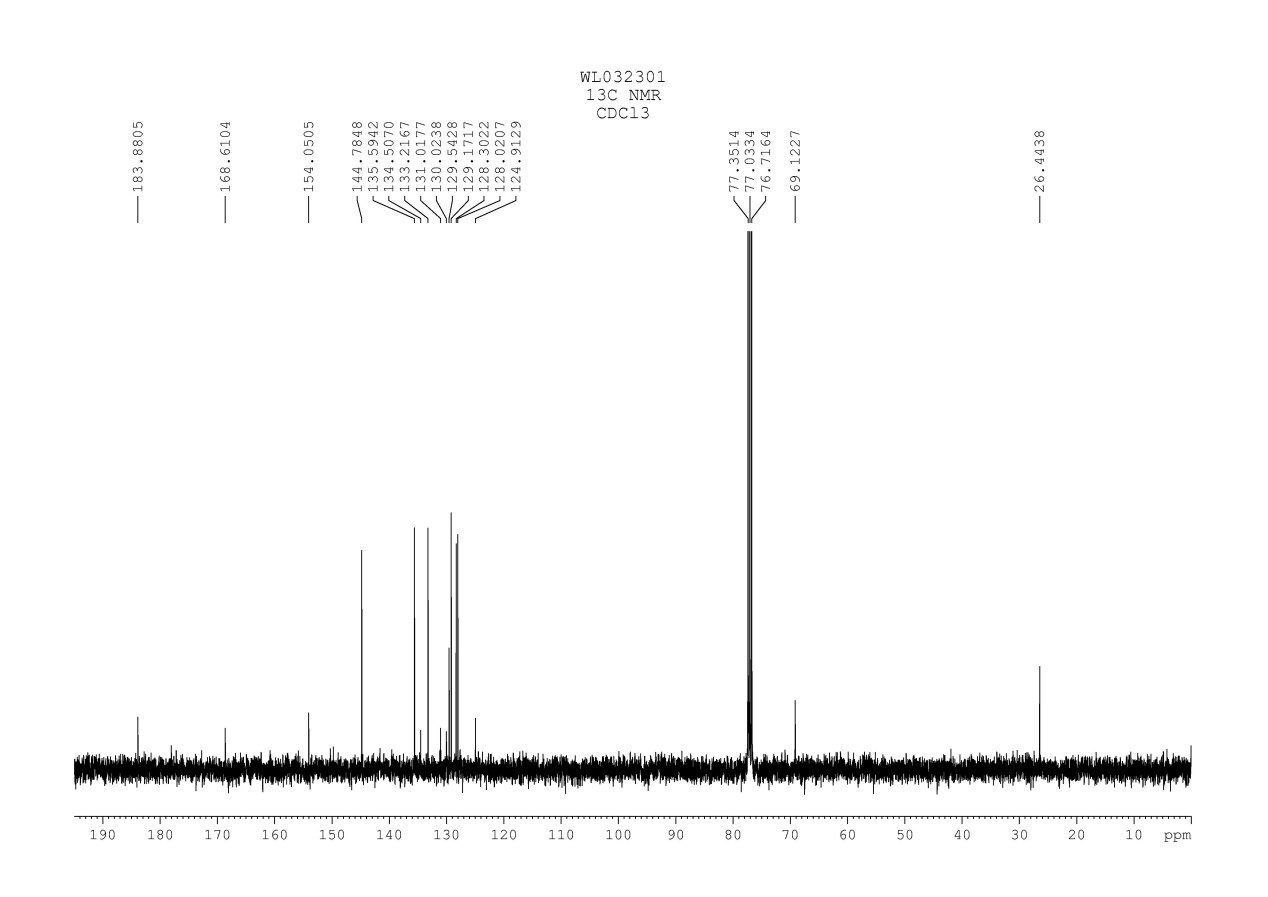
**

**Fig. 42** 13C NMR spectrum of compound **3t**

**
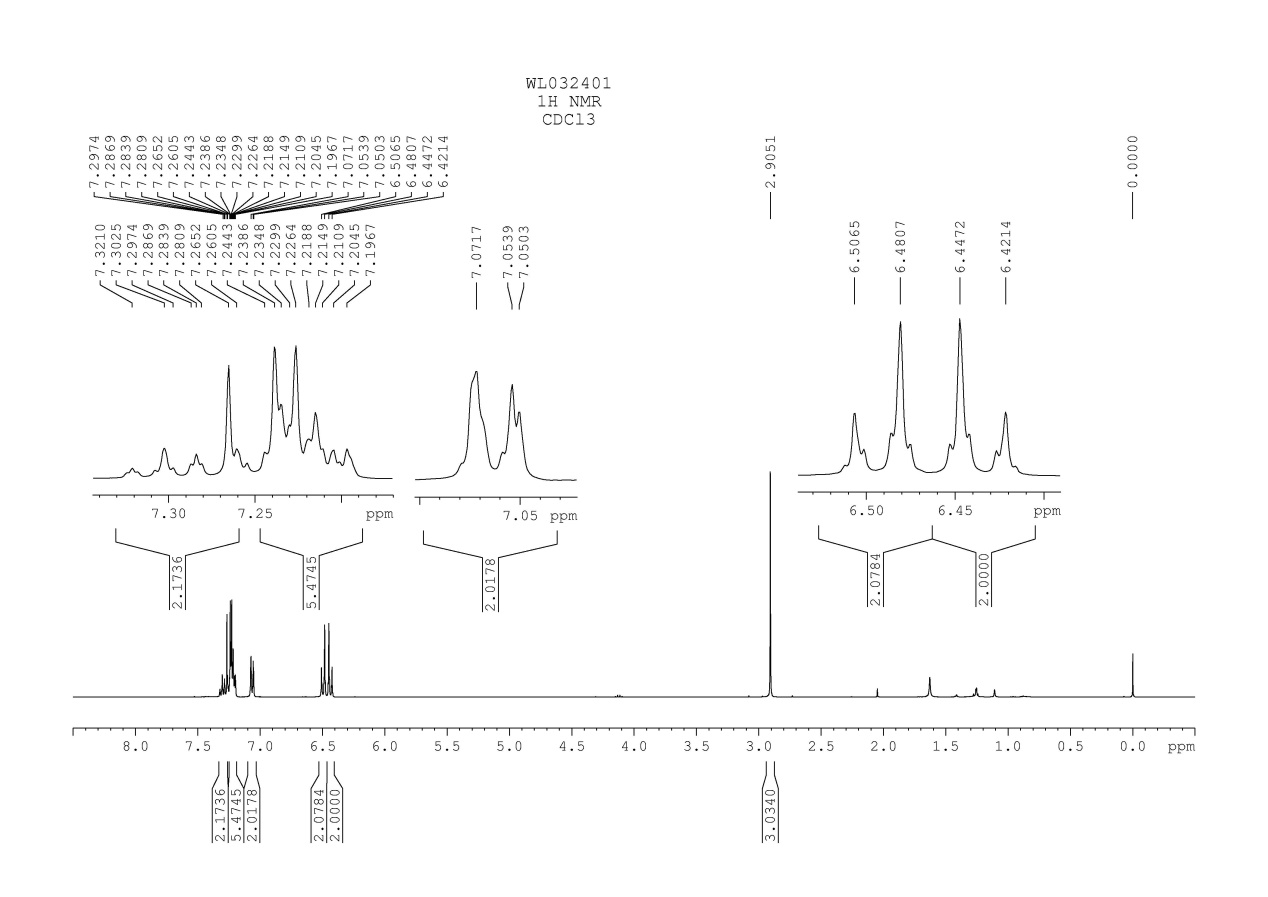
**

**Fig. 43** 1H NMR spectrum of compound **3u**

**
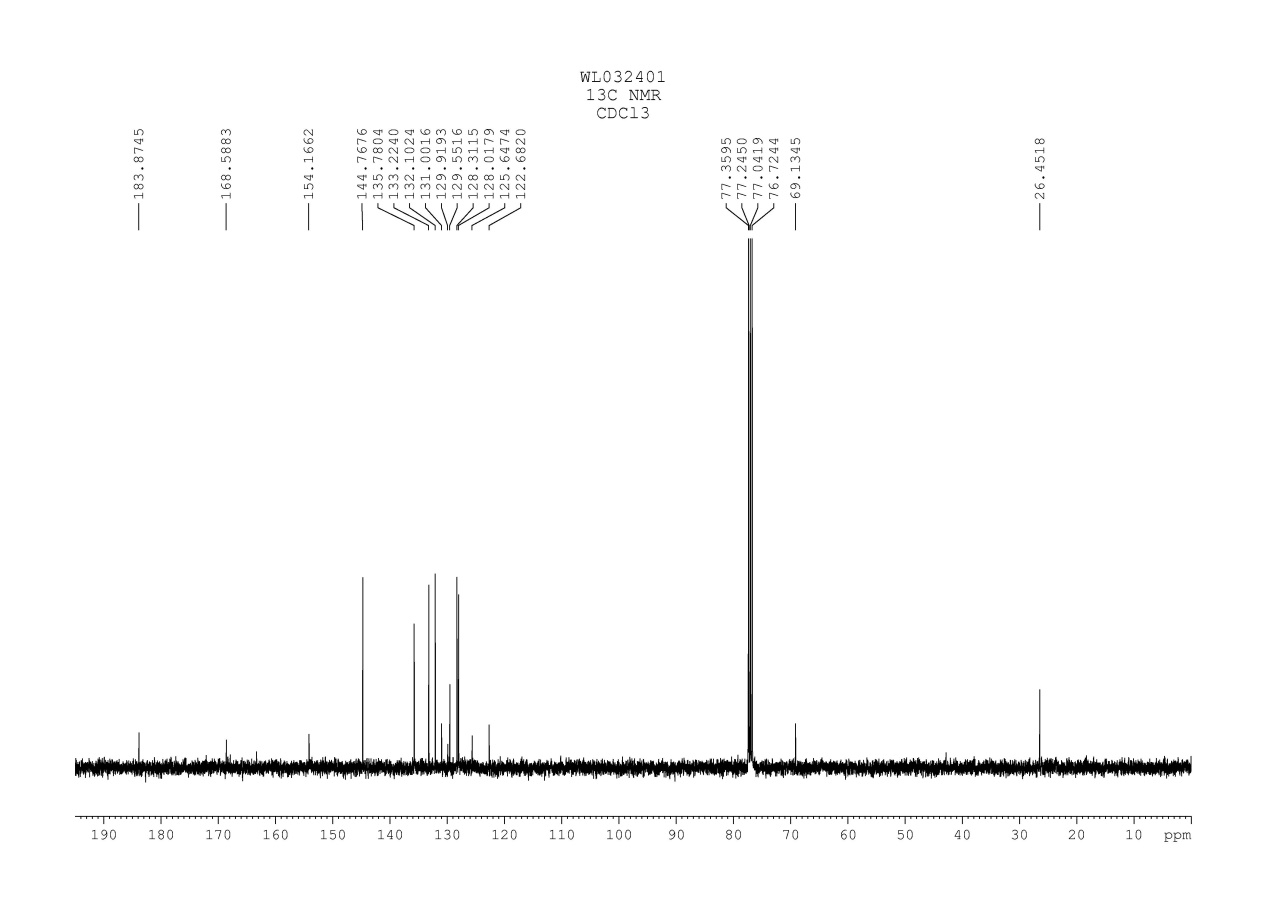
**

**Fig. 44** 13C NMR spectrum of compound **3u**

**
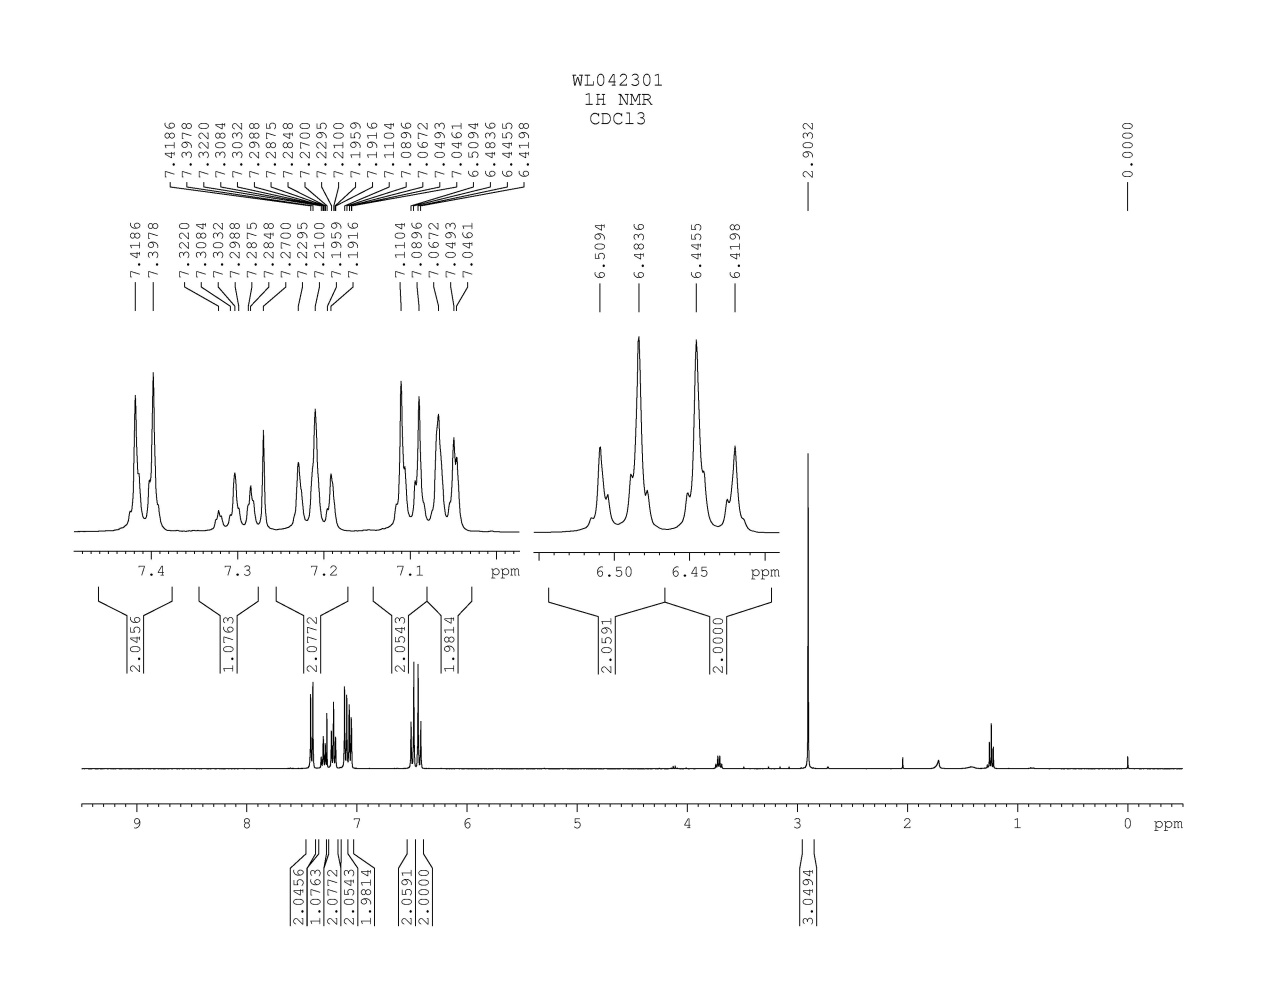
**

**Fig. 45** 1H NMR spectrum of compound **3v**

**
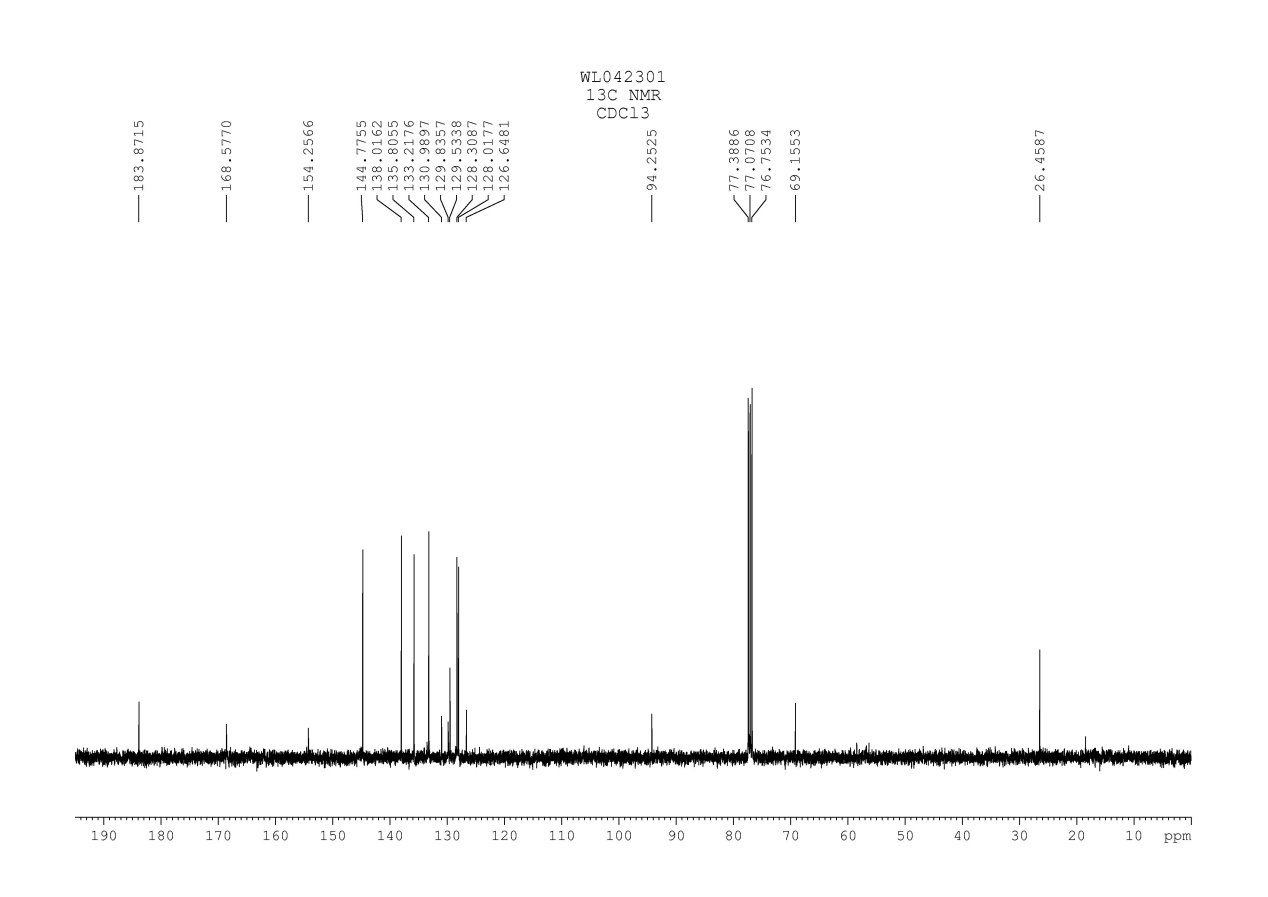
**

**Fig. 46** 13C NMR spectrum of compound **3v**

**
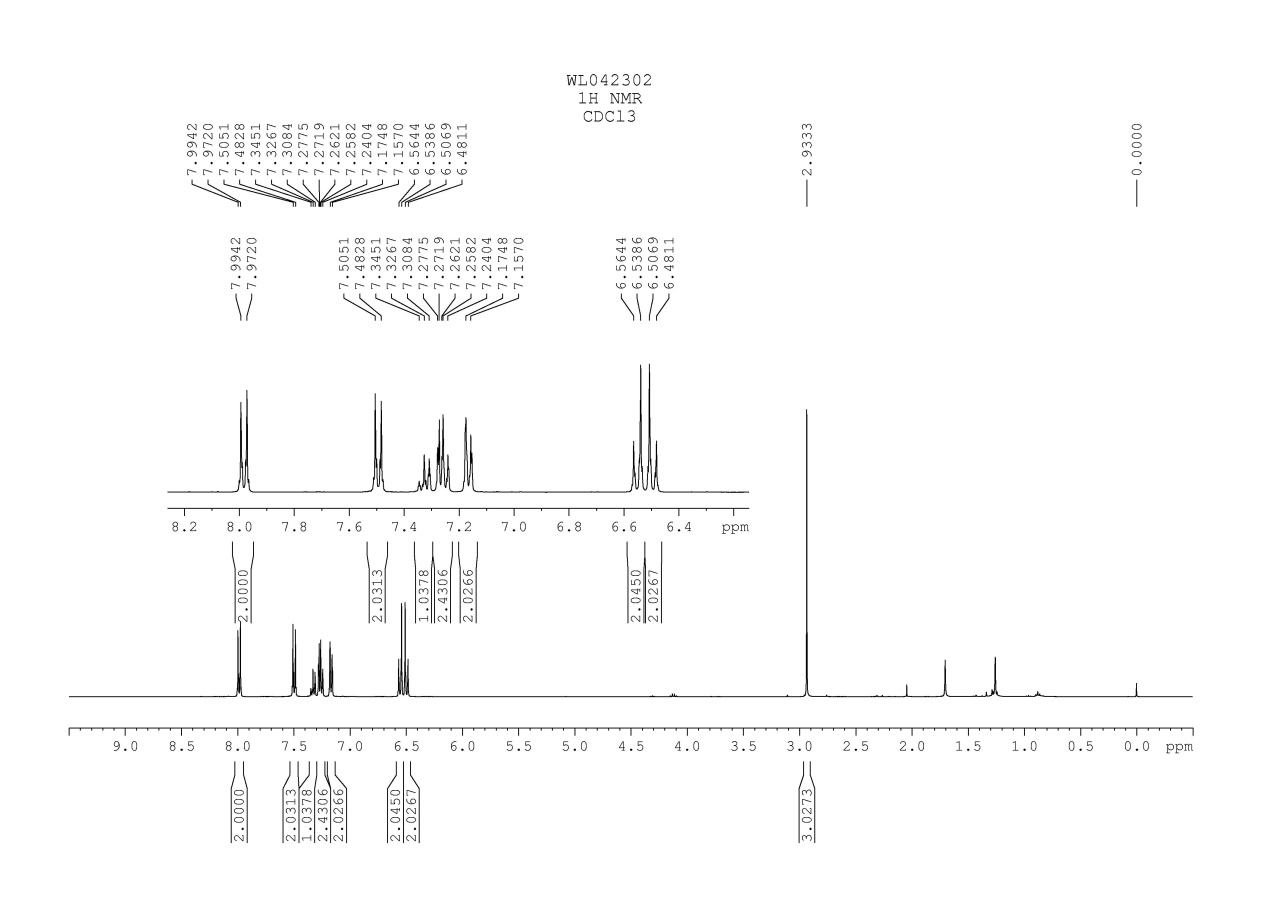
**

**Fig. 47** 1H NMR spectrum of compound **3w**

**
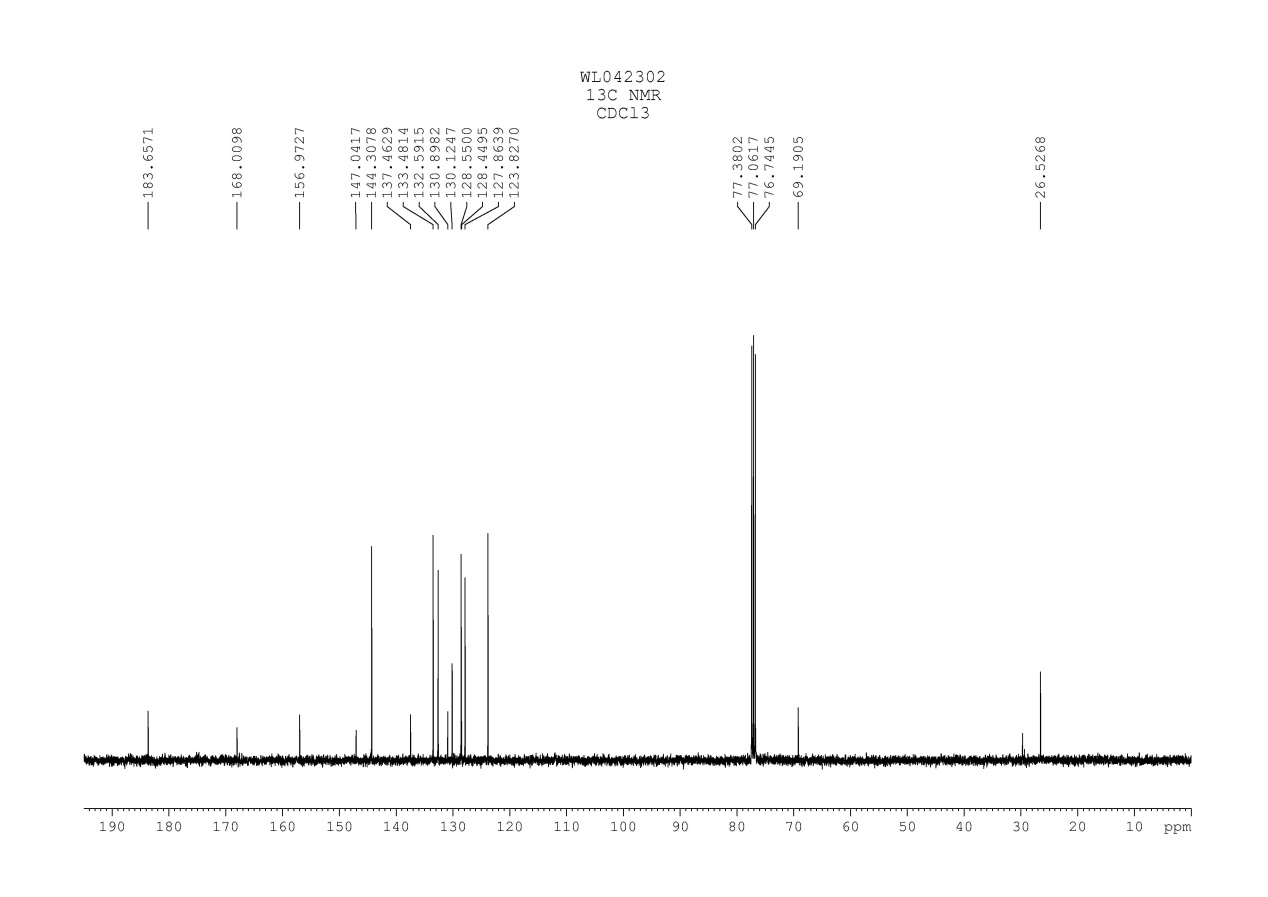
**

**Fig. 48** 13C NMR spectrum of compound **3w**

**
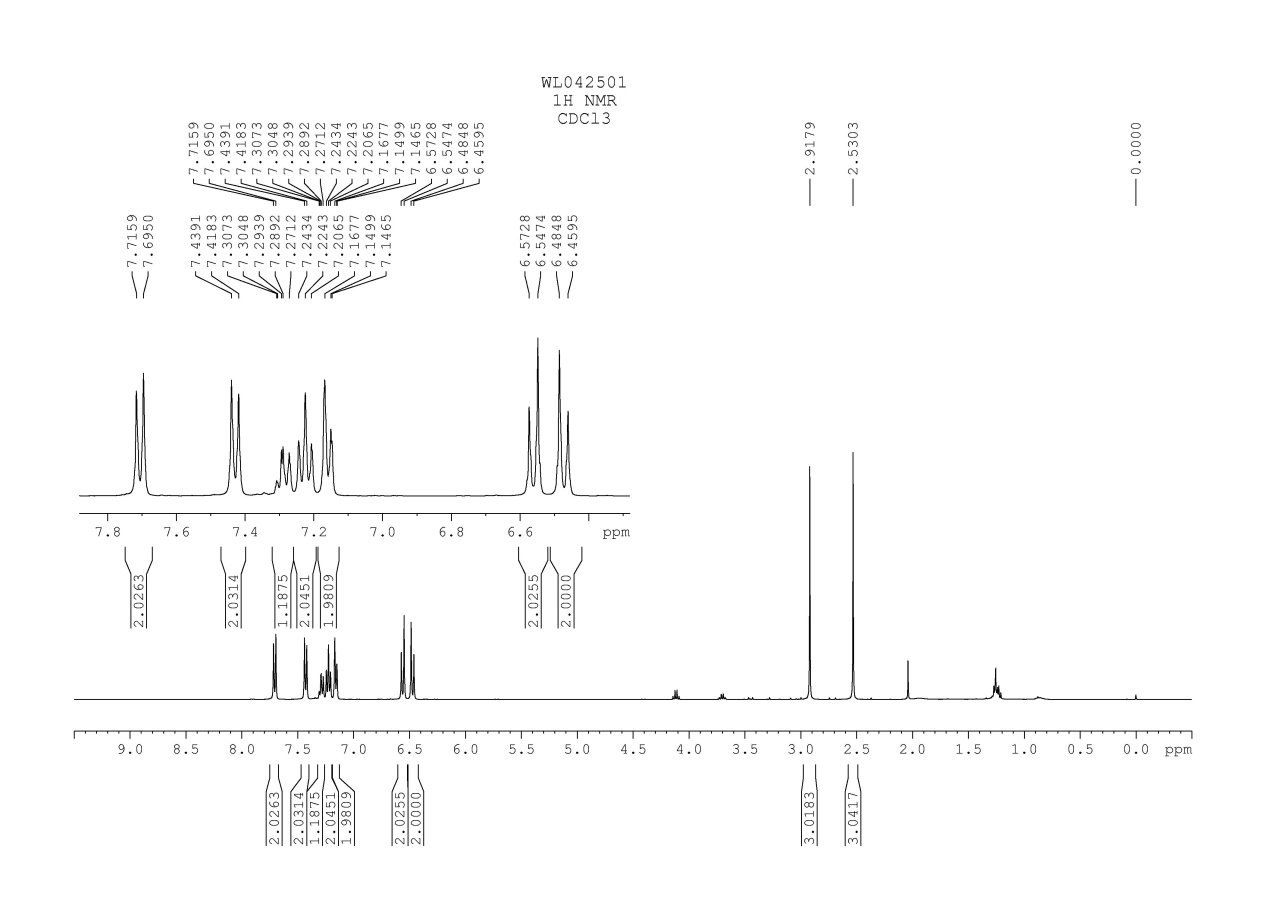
**

**Fig. 49** 1H NMR spectrum of compound **3x**

**
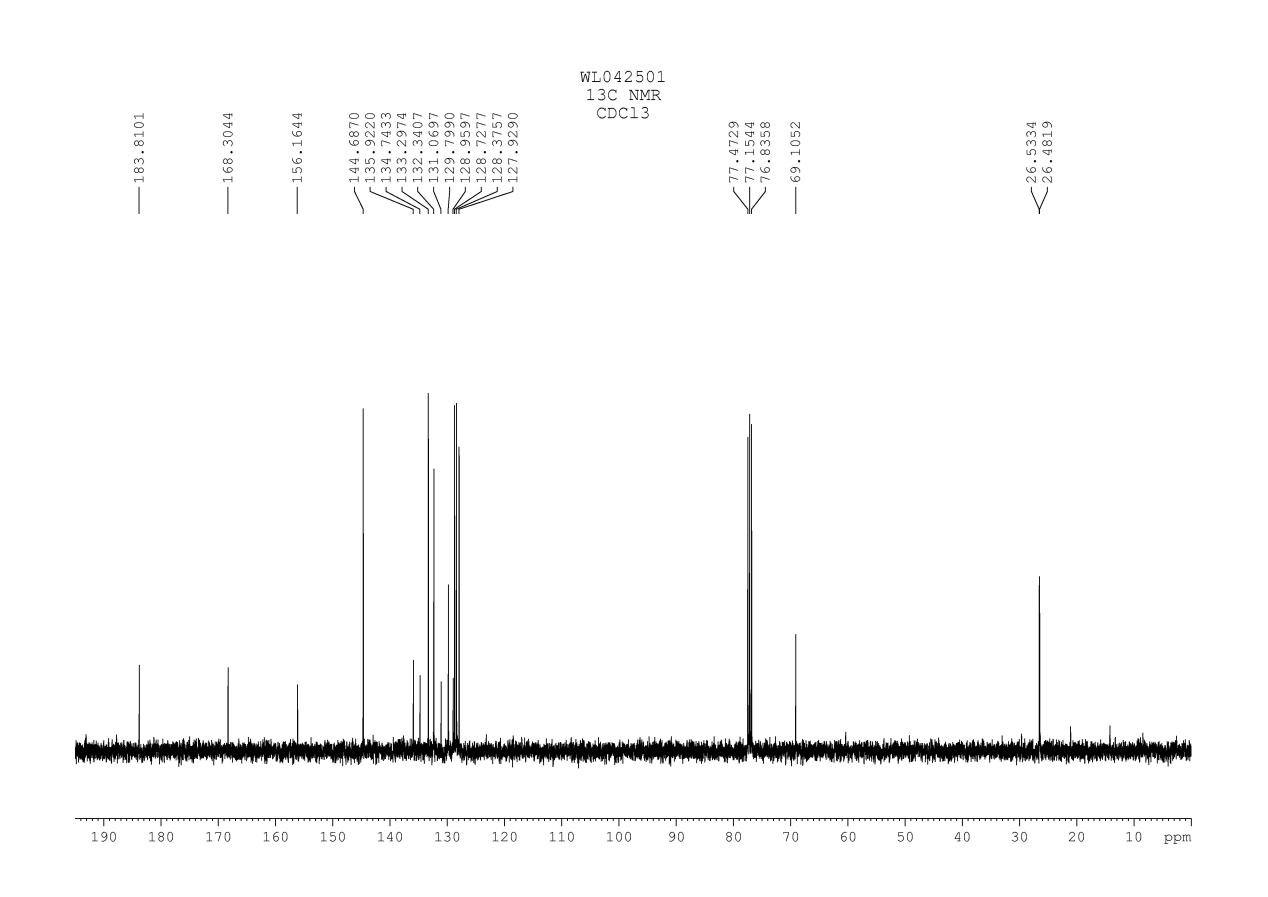
**

**Fig. 50** 13C NMR spectrum of compound **3x**

**
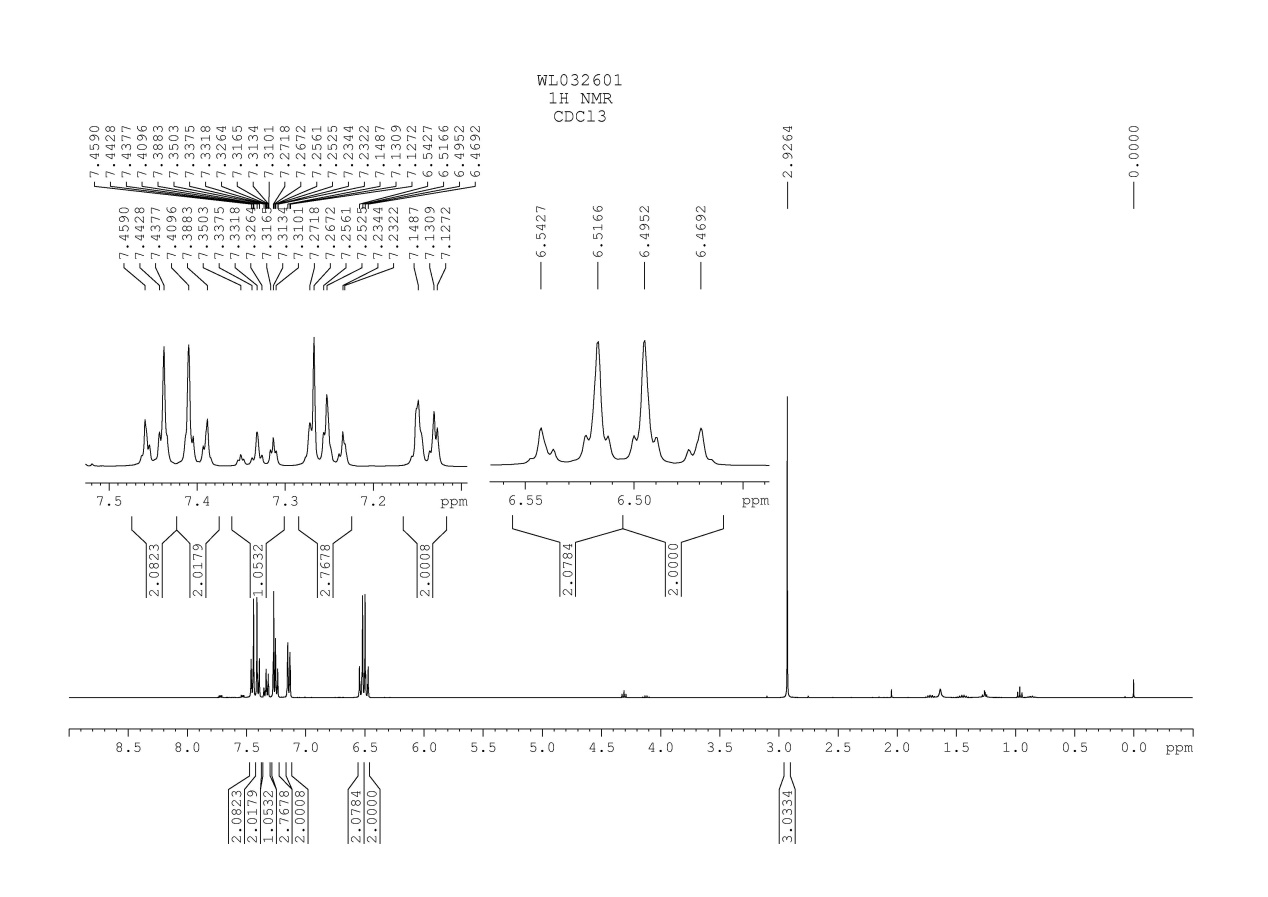
**

**Fig. 51** 1H NMR spectrum of compound **3y**

**
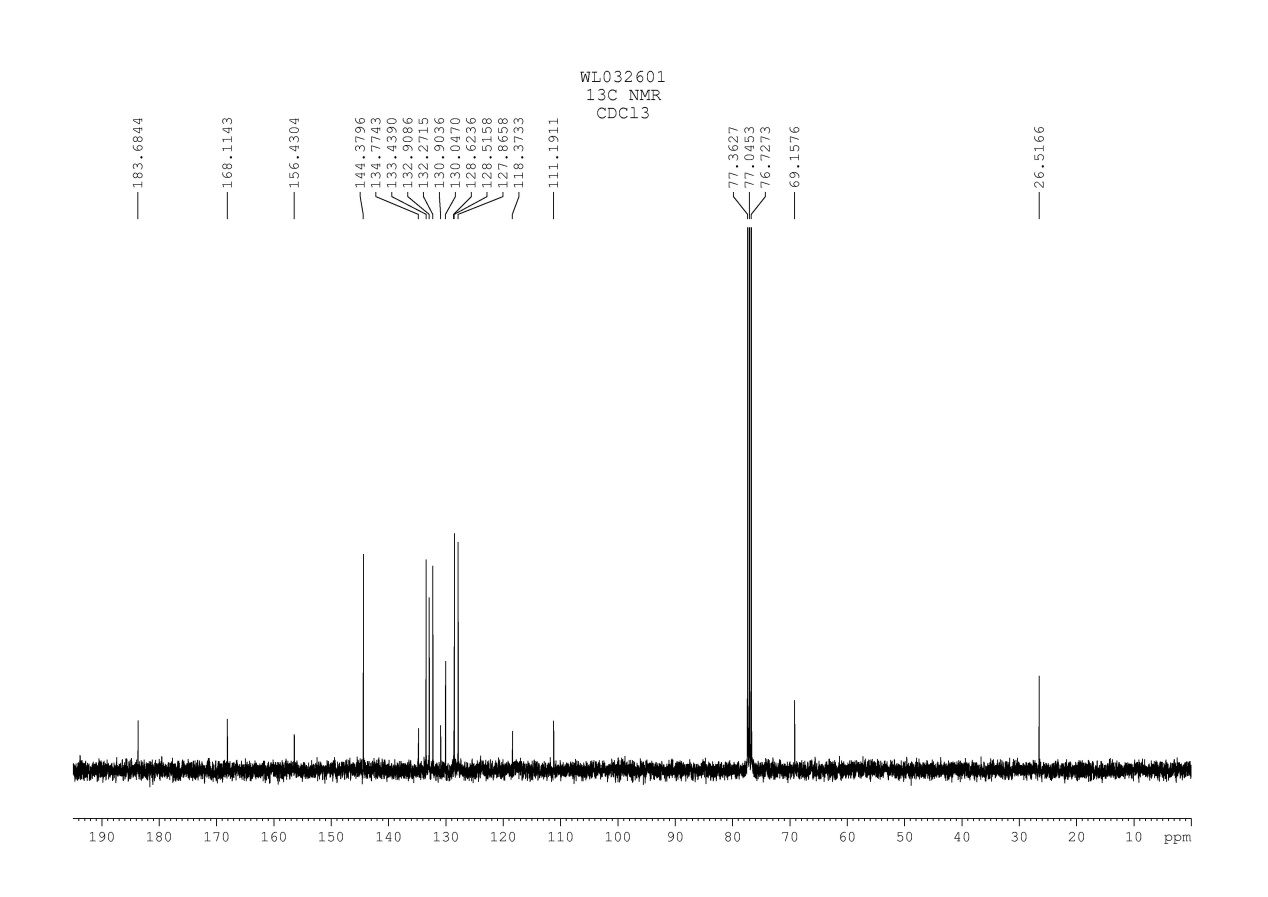
**

**Fig. 52** 13C NMR spectrum of compound **3y**

**
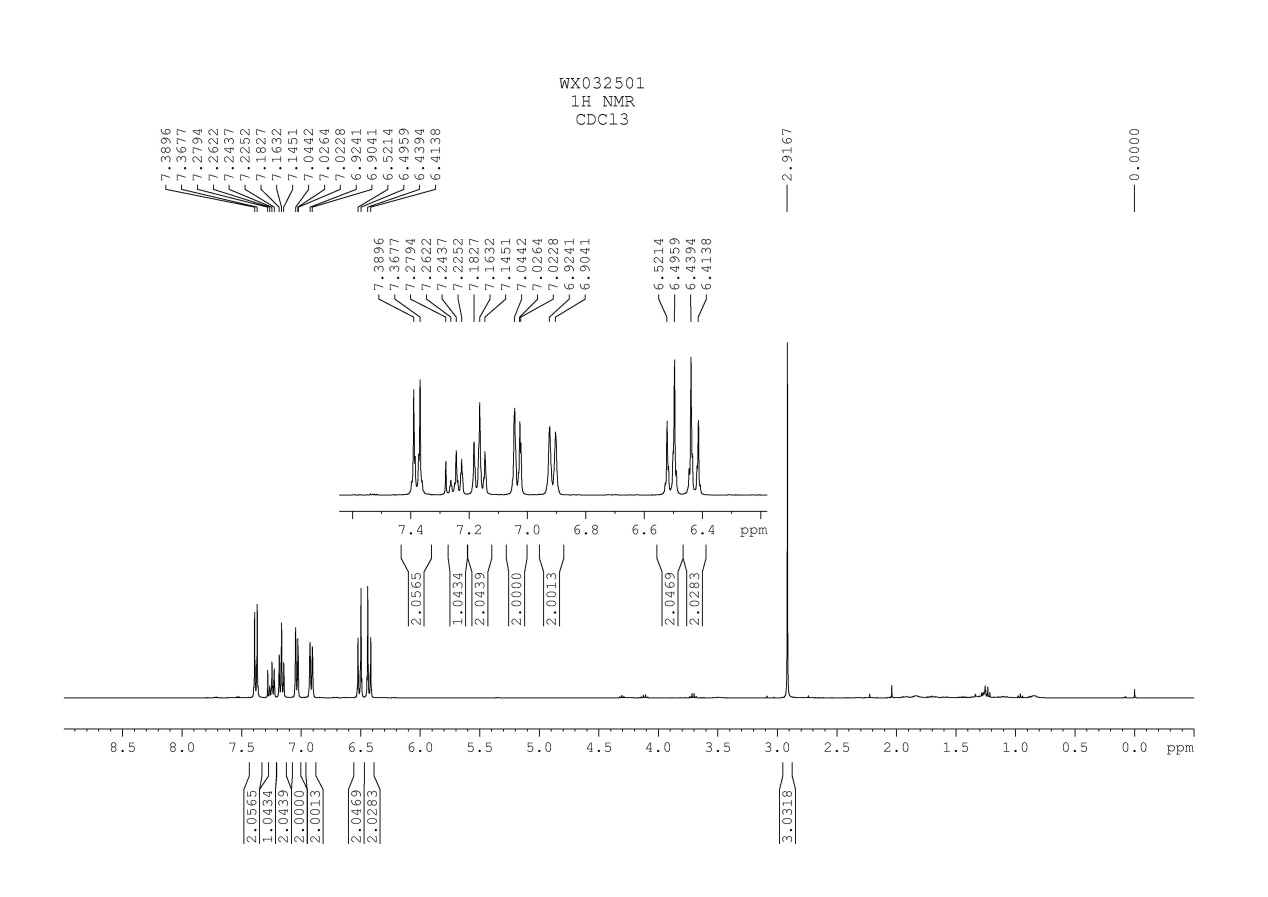
**

**Fig. 53** 1H NMR spectrum of compound **3z**

**
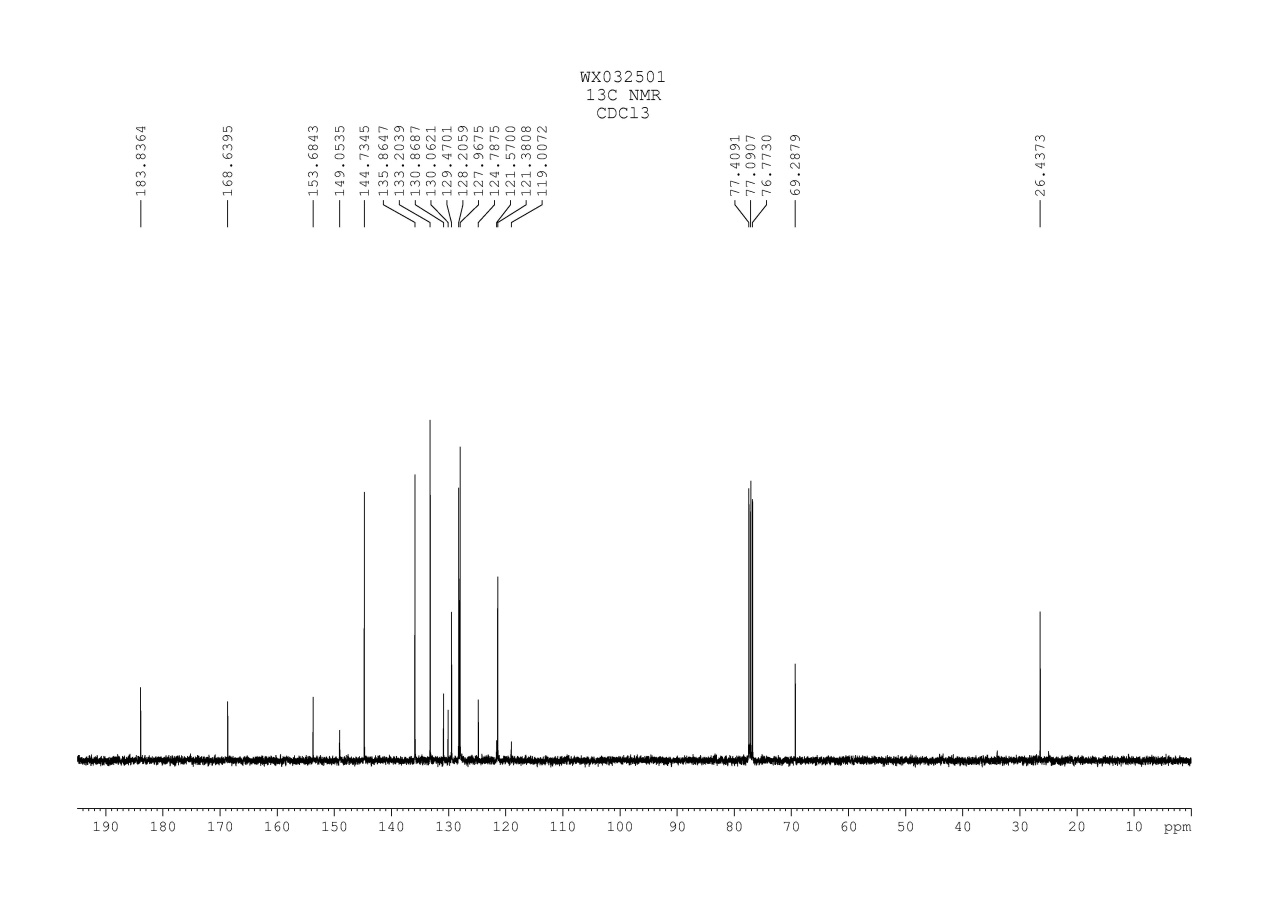
**

**Fig. 54** 13C NMR spectrum of compound **3z**

**
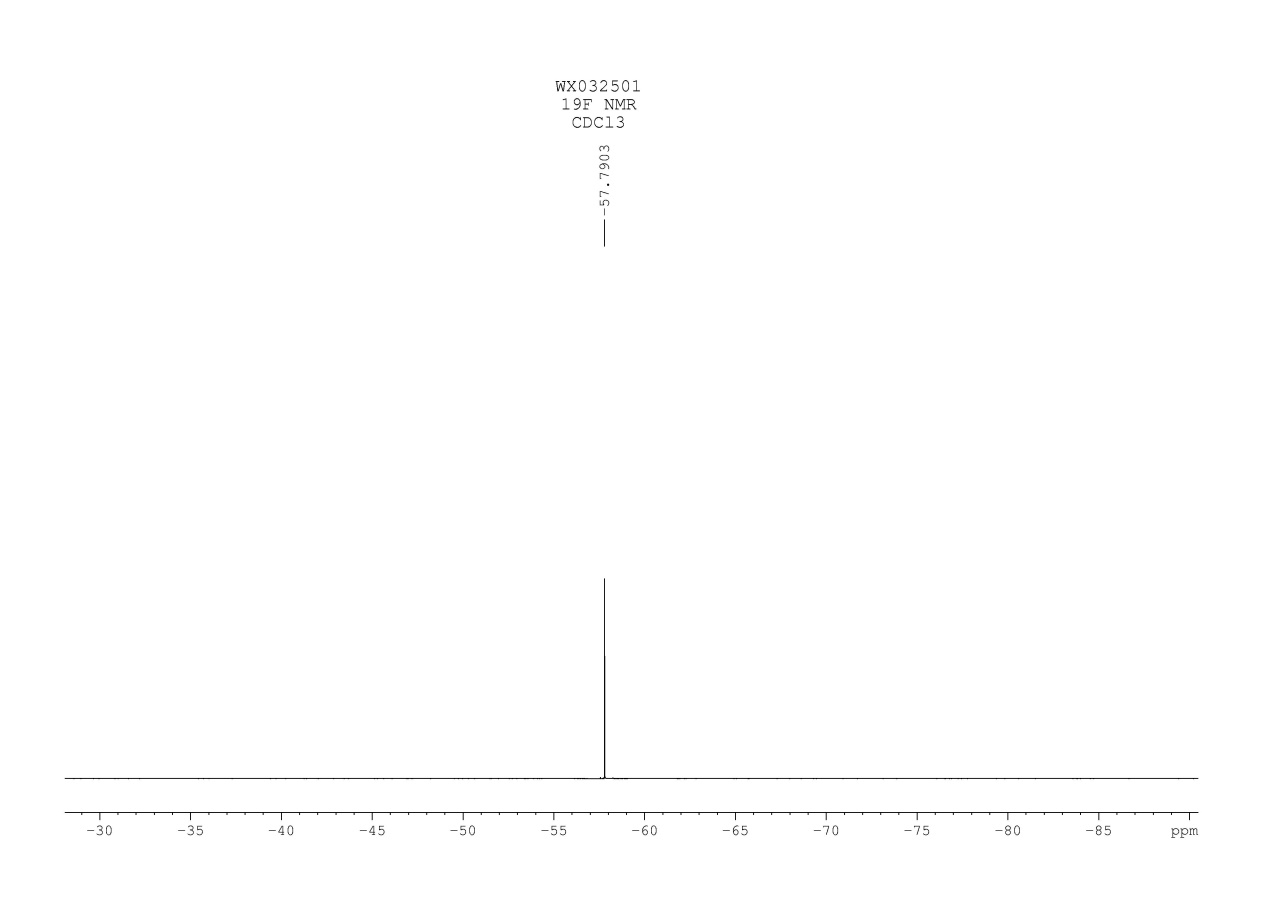
**

**Fig. 55** 19F NMR spectrum of compound **3z**

**
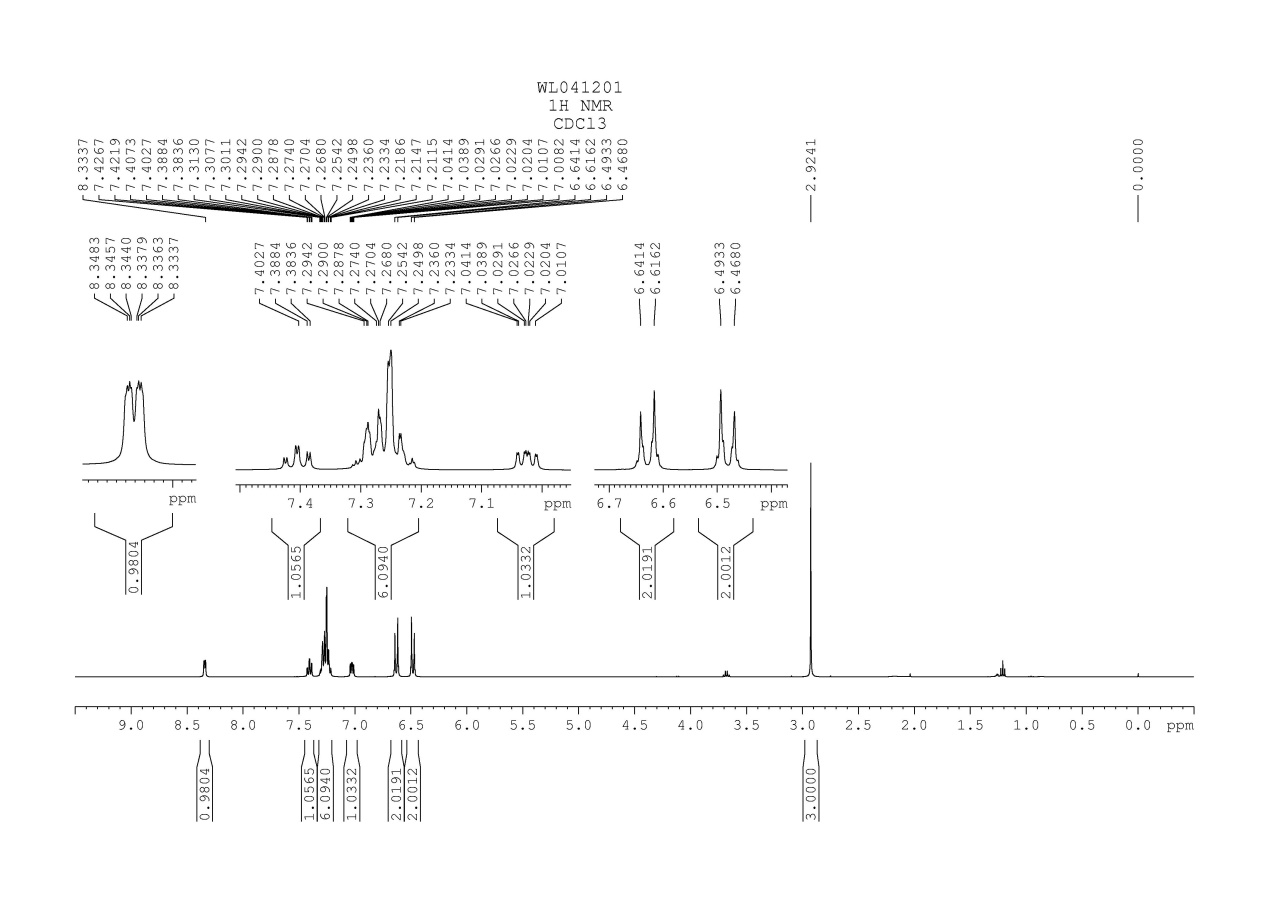
**

**Fig. 56** 1H NMR spectrum of compound **3ap**

**
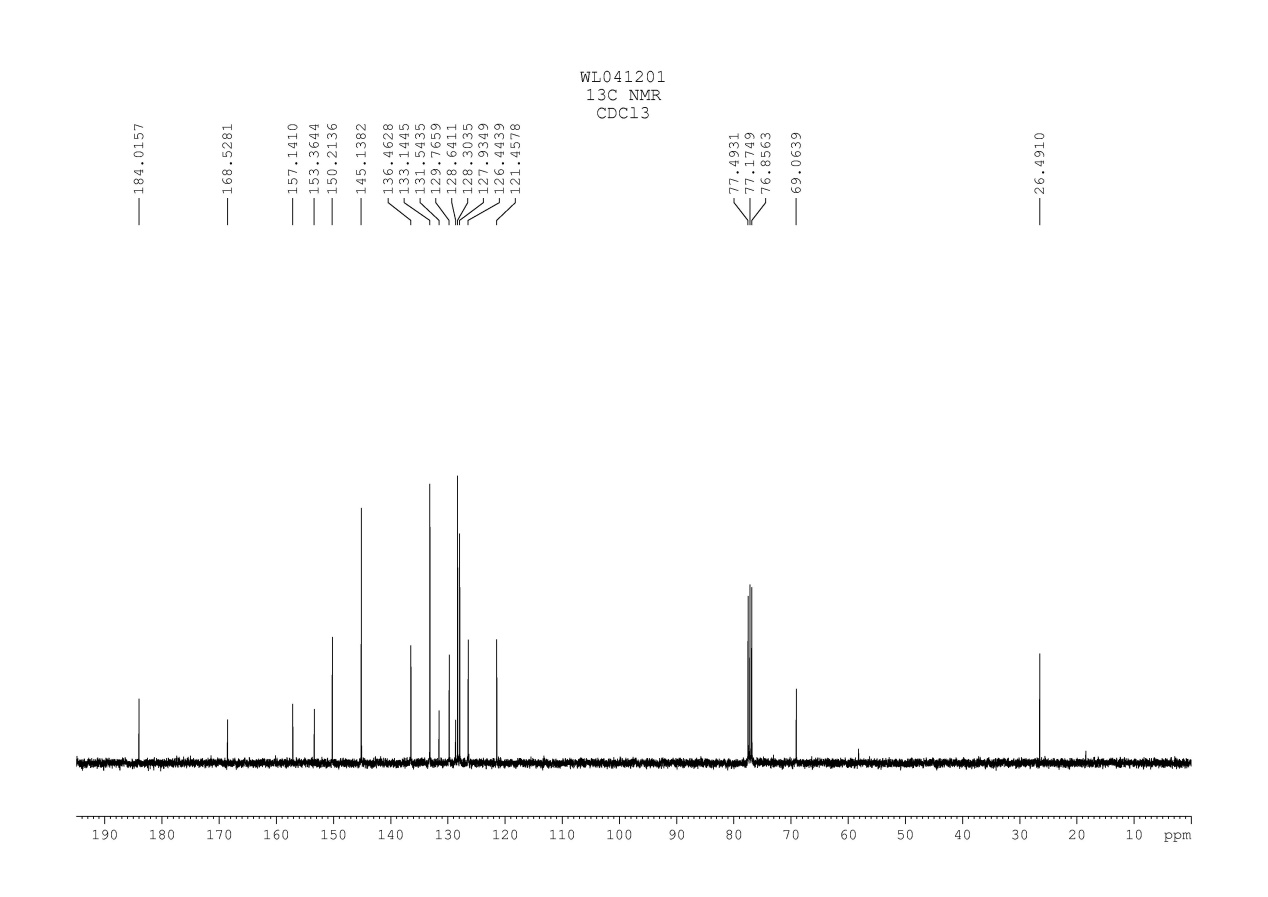
**

**Fig. 57** 13C NMR spectrum of compound **3ap**

**
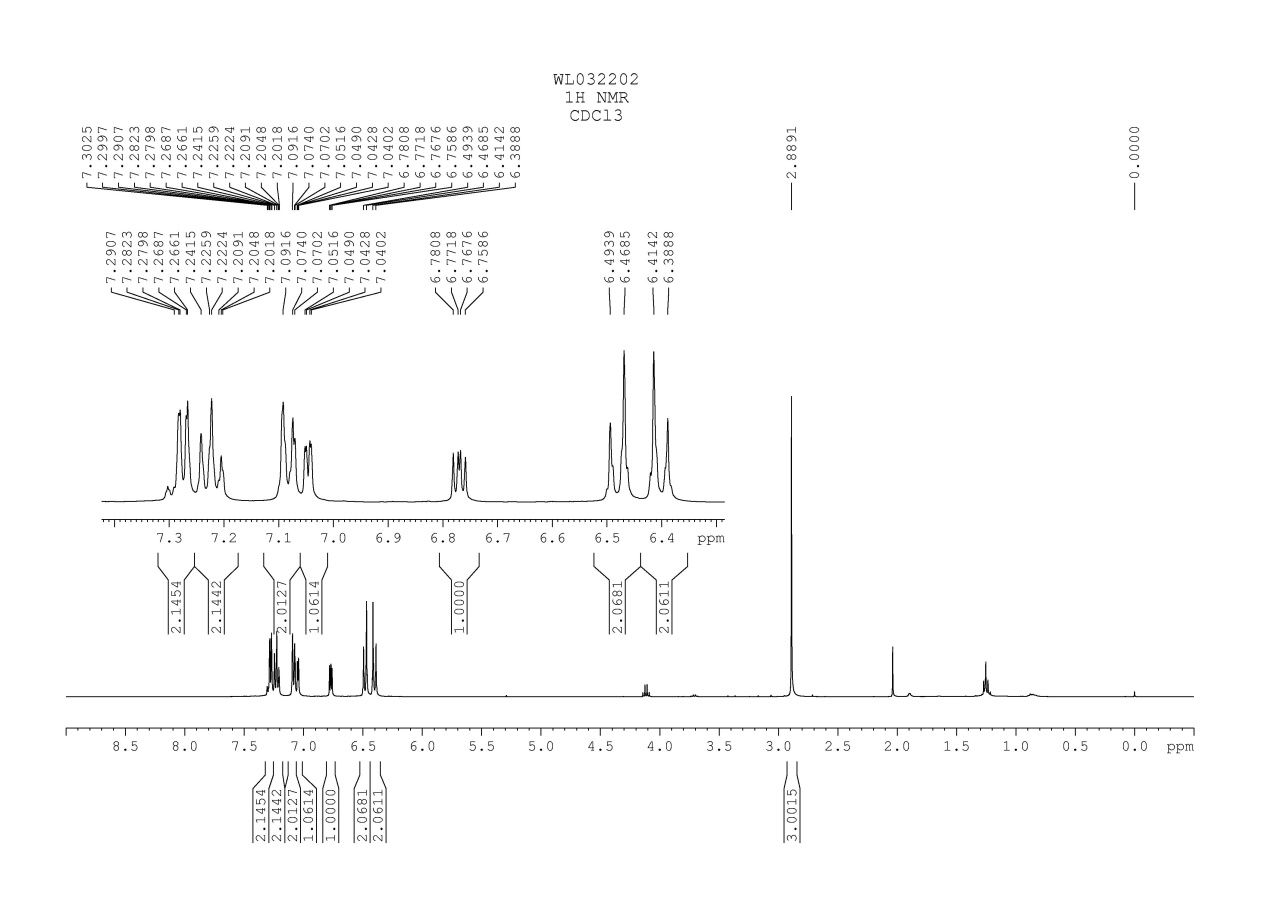
**

**Fig. 58** 1H NMR spectrum of compound **3aq**

**
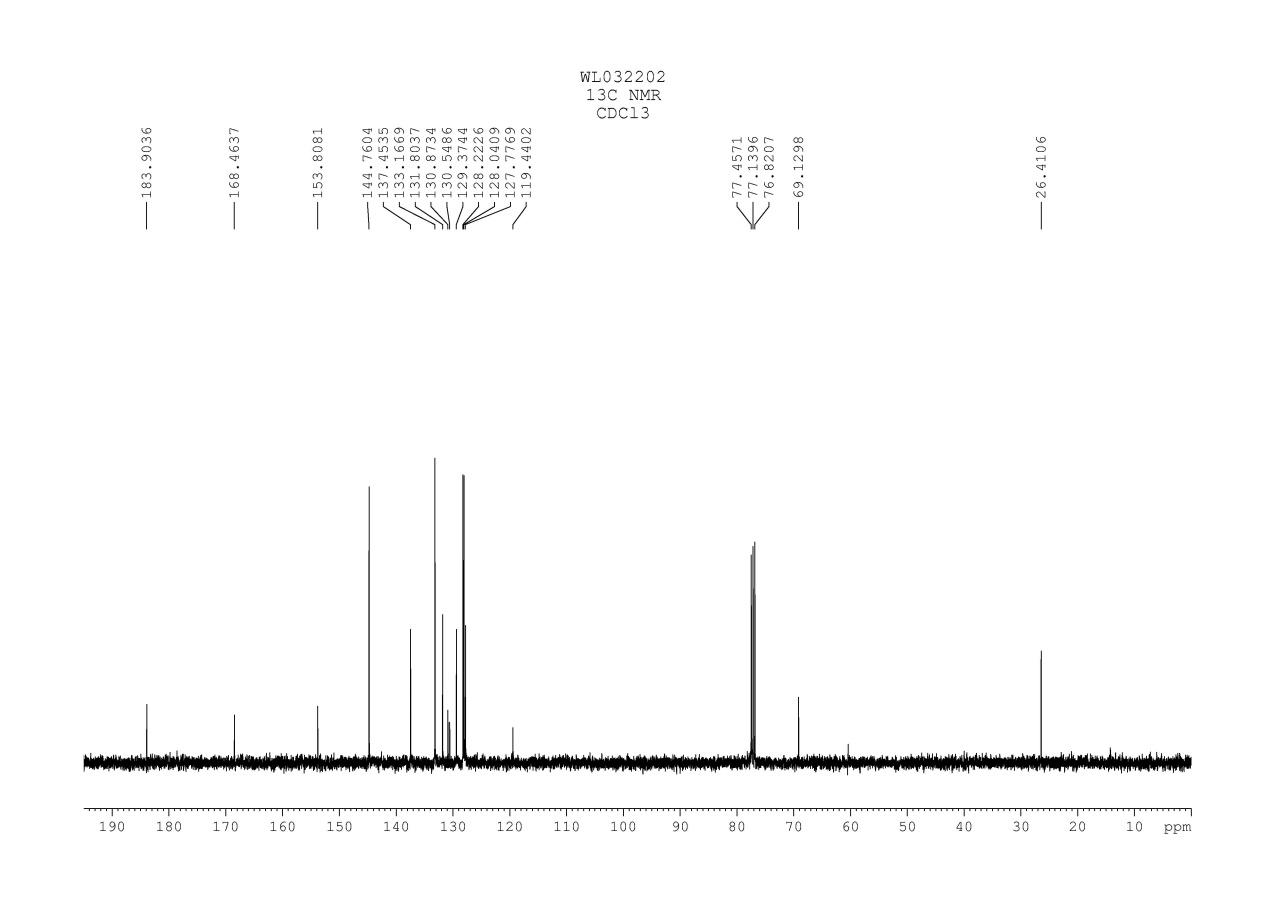
**

**Fig. 59** 13C NMR spectrum of compound **3aq**

**
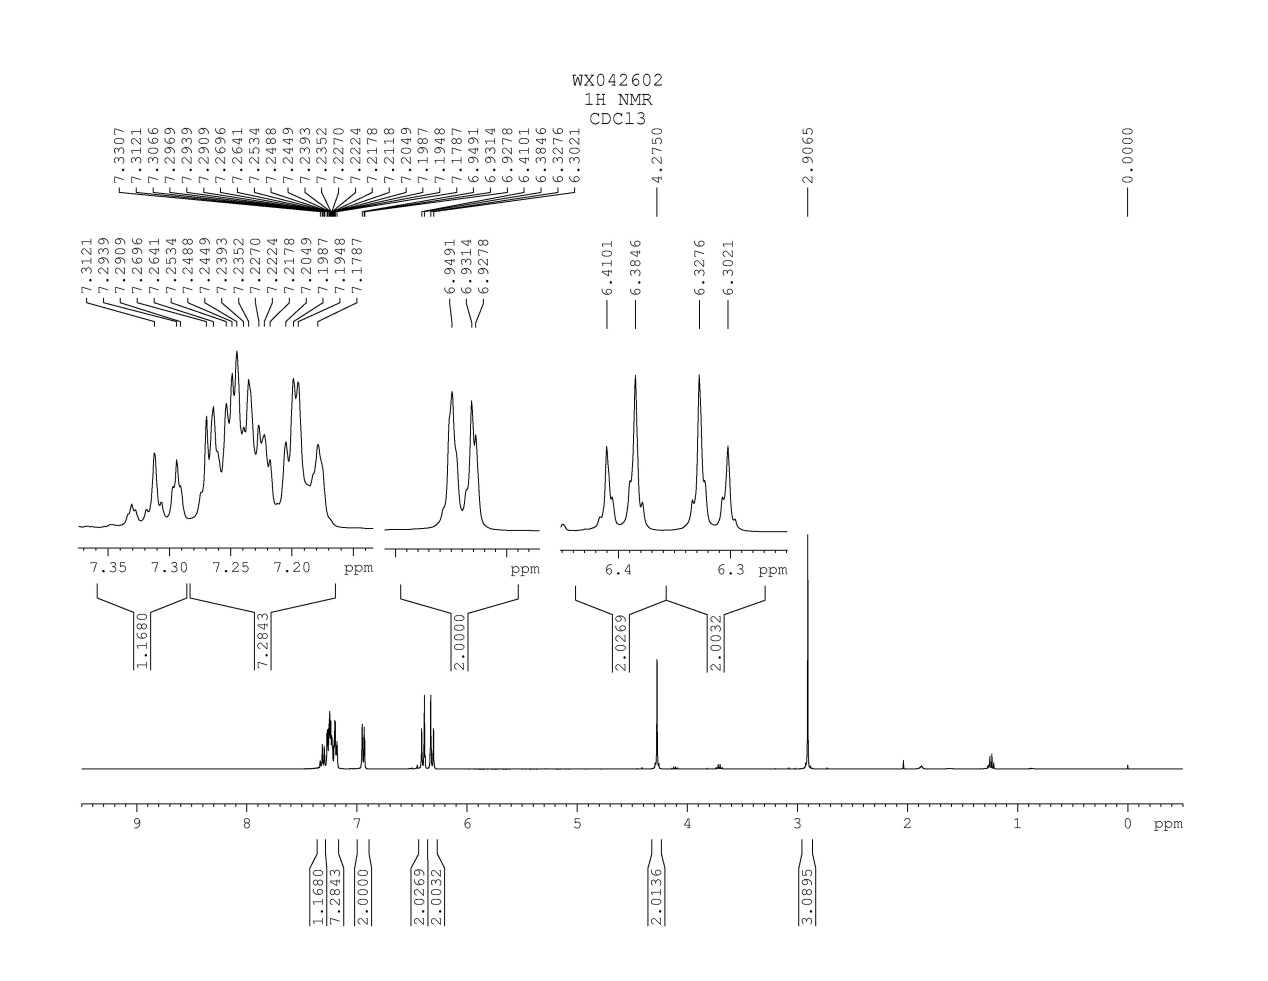
**

**Fig. 60** 1H NMR spectrum of compound **3ar**

**
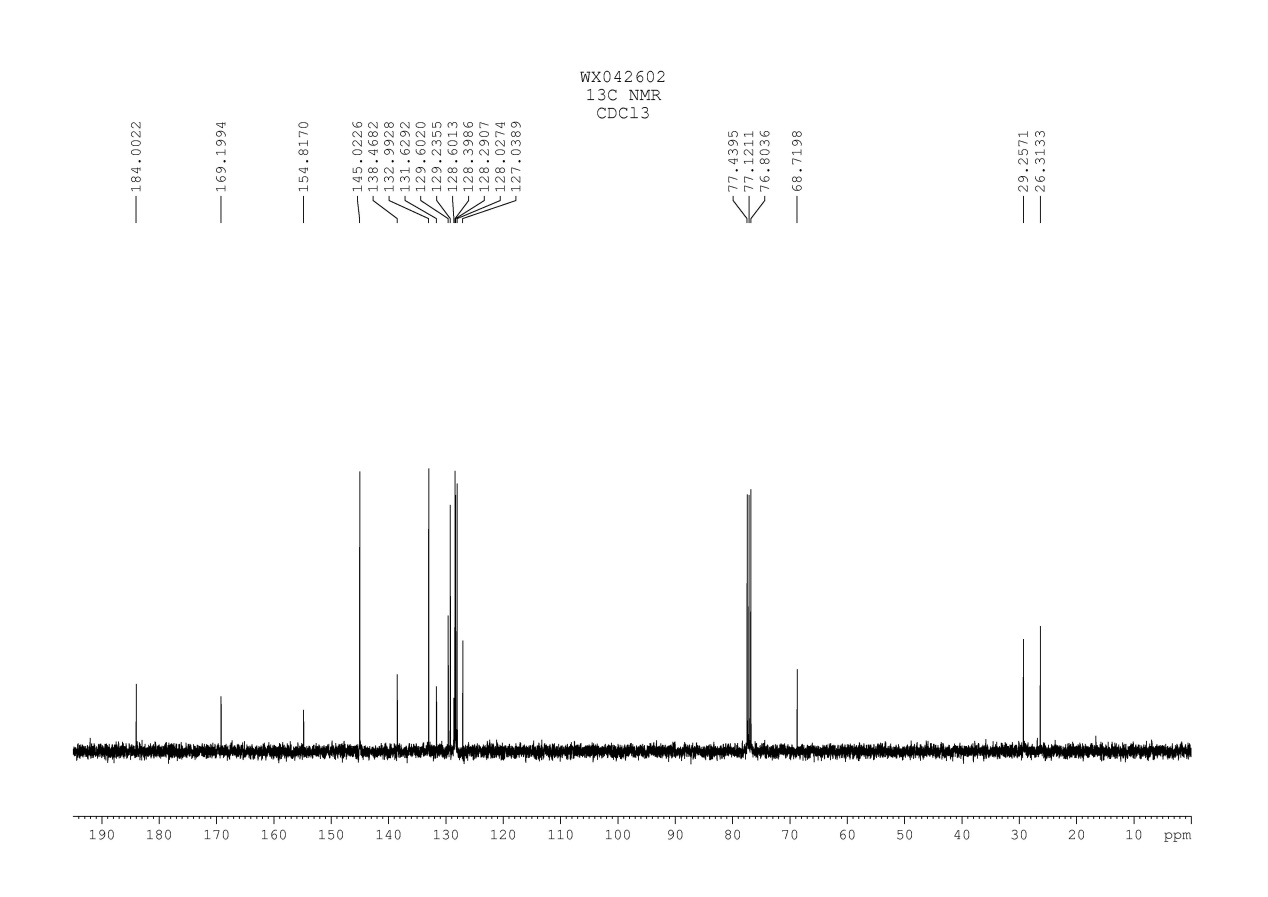
**

**Fig. 61** 13C NMR spectrum of compound **3ar**

**
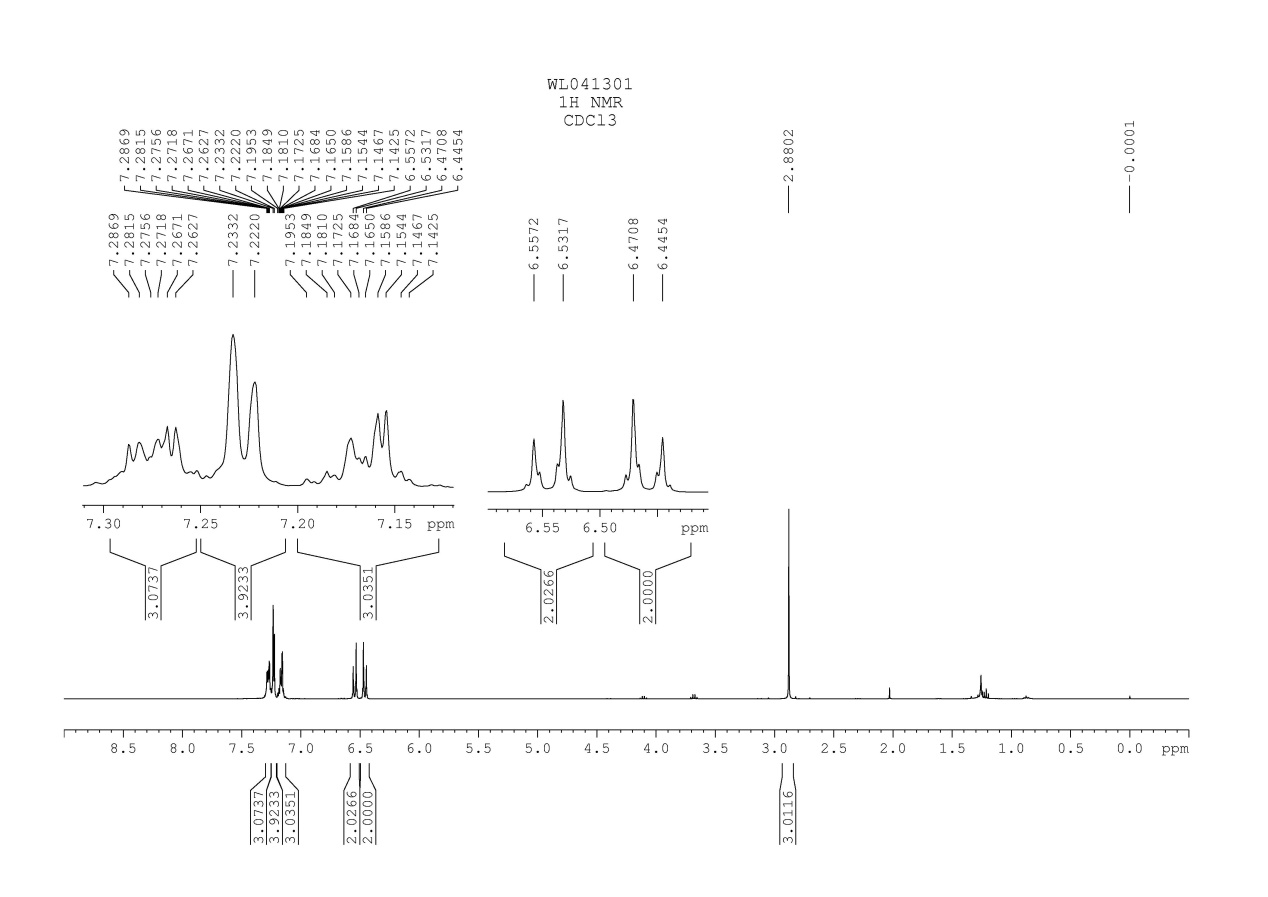
**

**Fig. 62** 1H NMR spectrum of compound **5a**

**
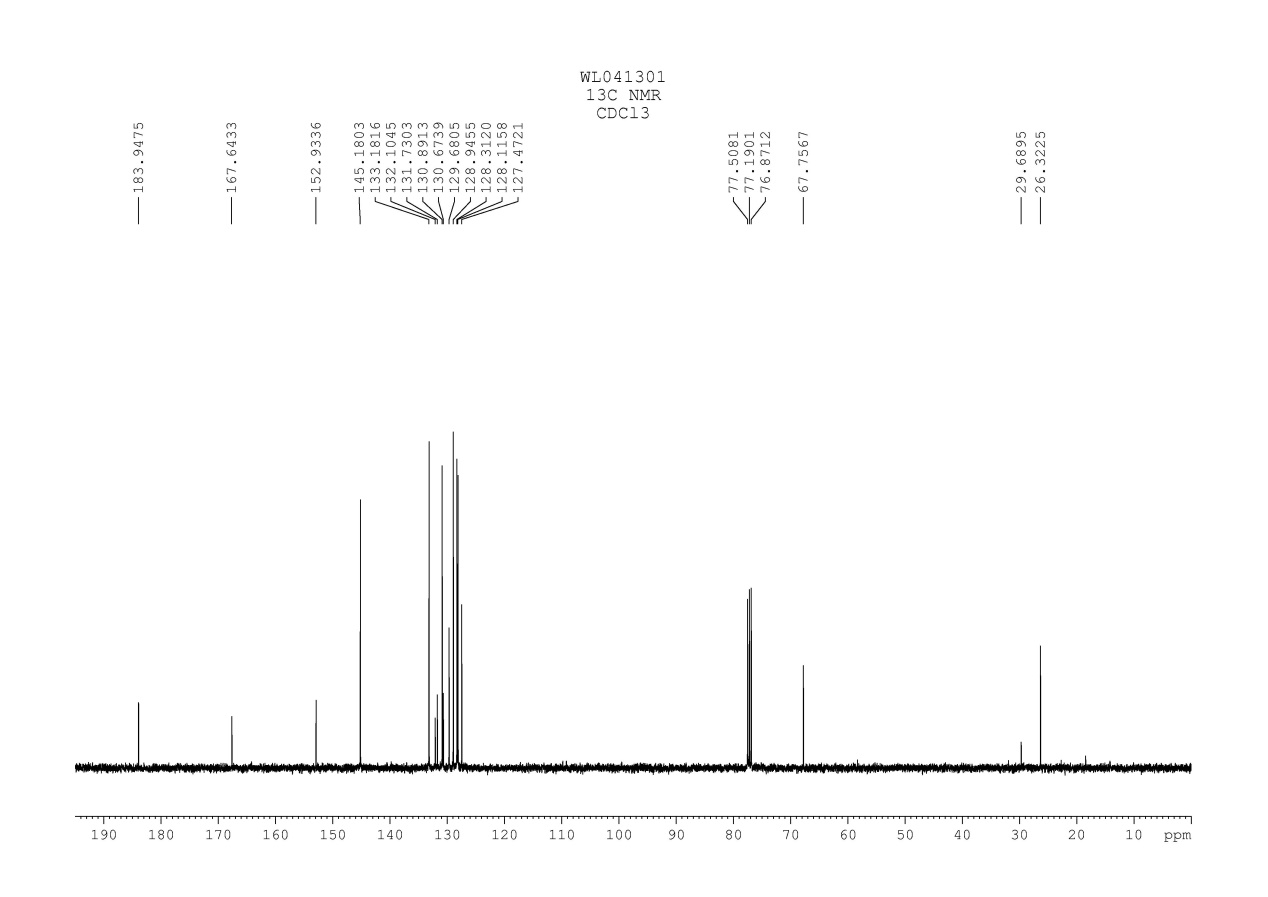
**

**Fig. 63** 13C NMR spectrum of compound **5a**

**
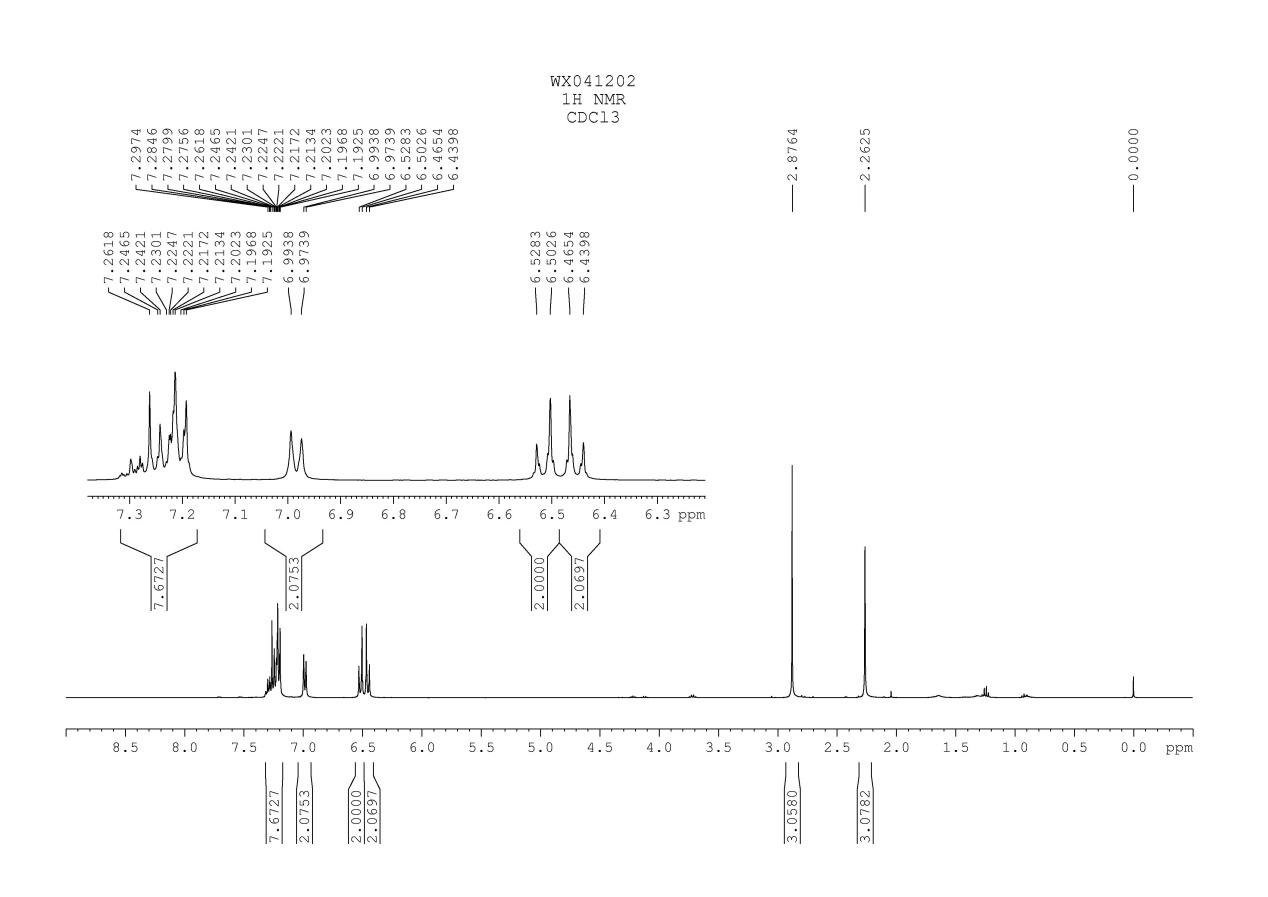
**

**Fig. 64** 1H NMR spectrum of compound **5b**

**
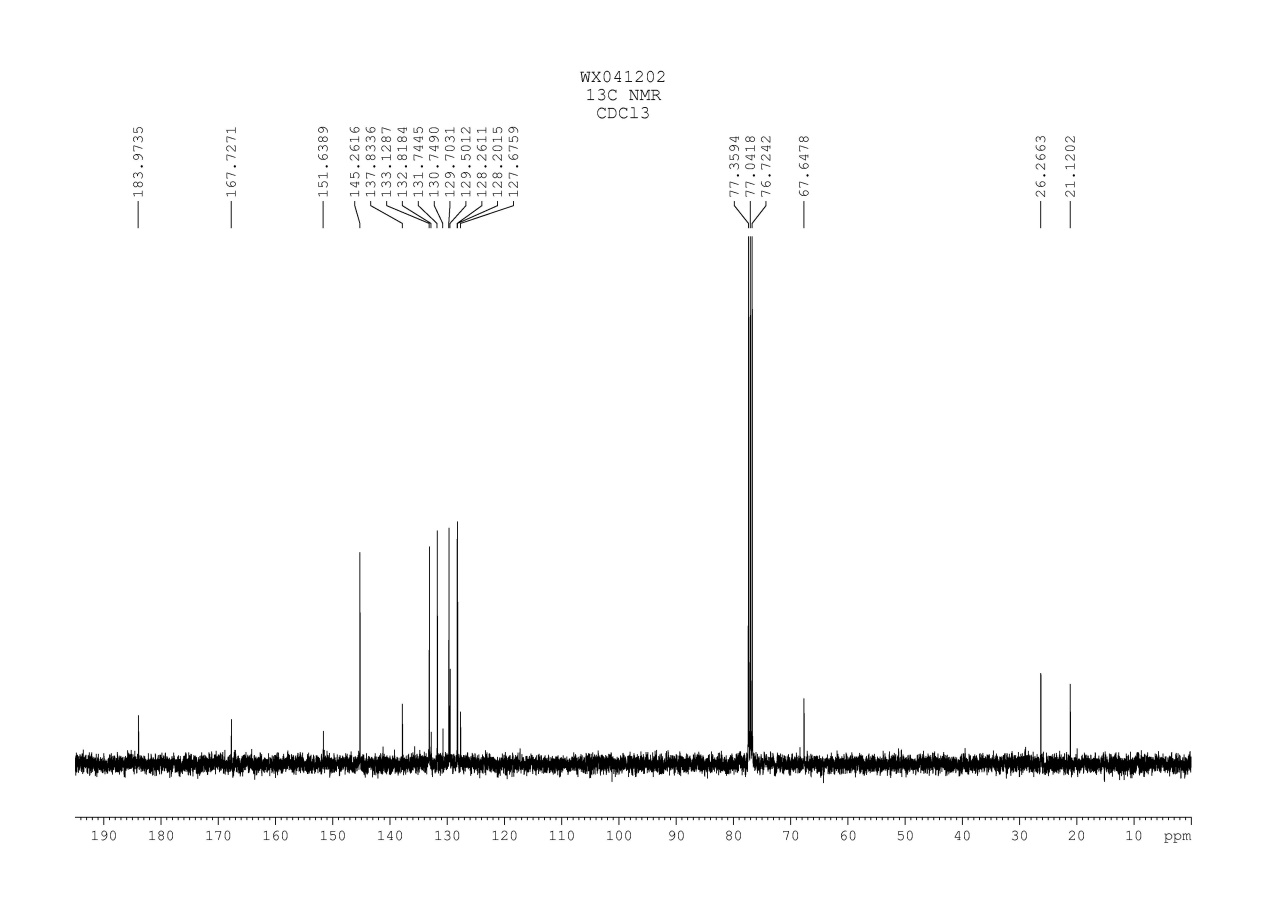
**

**Fig. 65** 13C NMR spectrum of compound **5b**

**
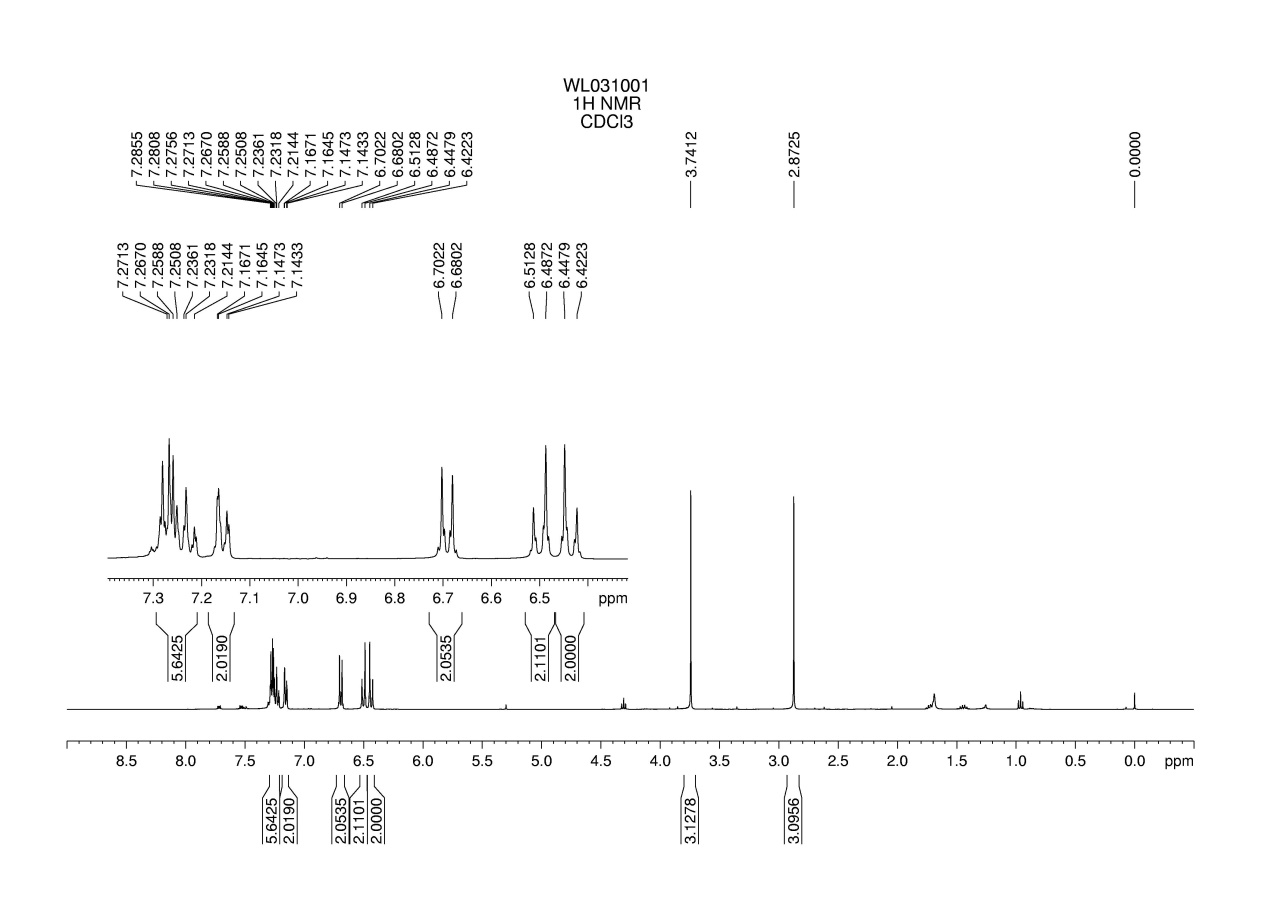
**

**Fig. 66** 1H NMR spectrum of compound **5c**

**
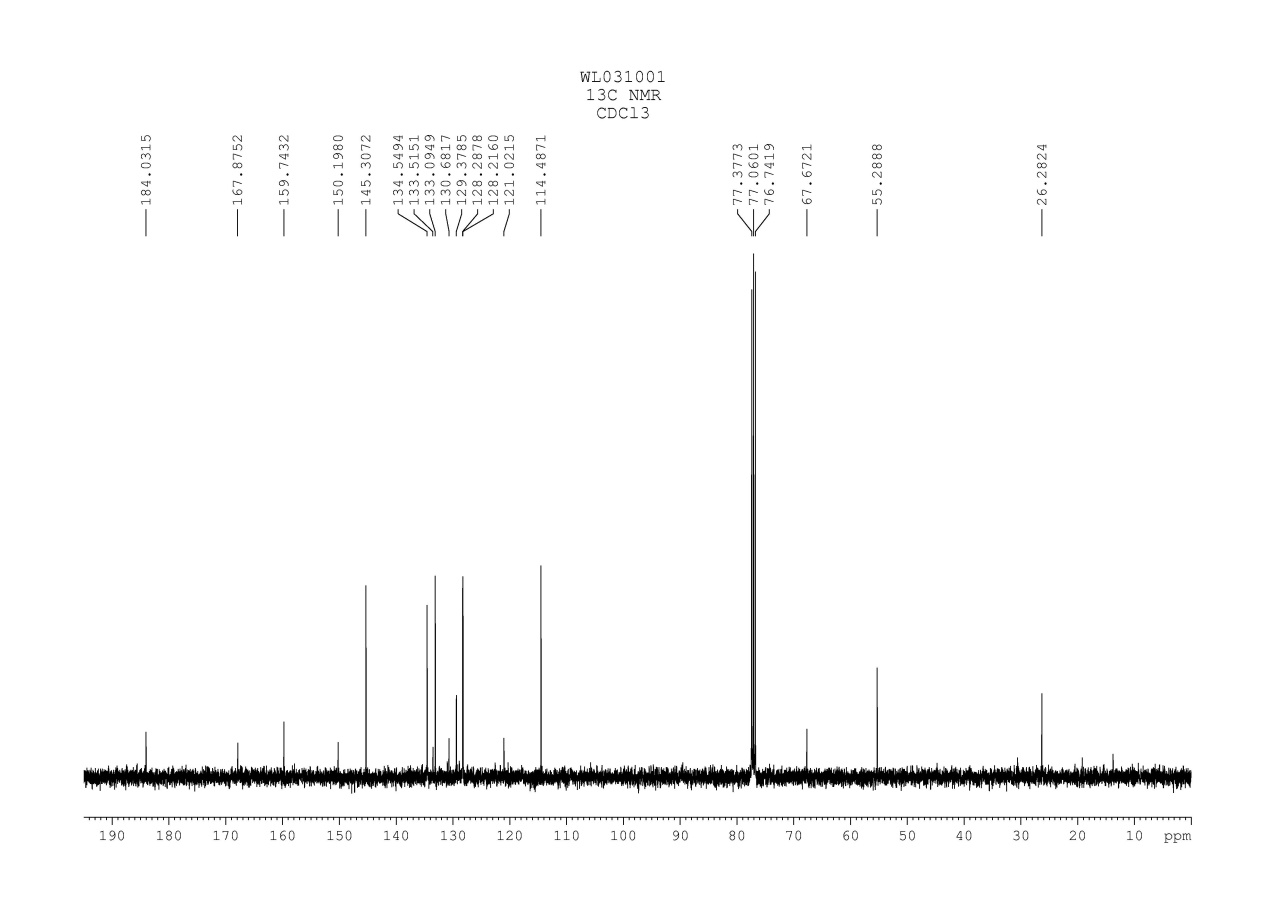
**

**Fig. 67** 13C NMR spectrum of compound **5c**

**
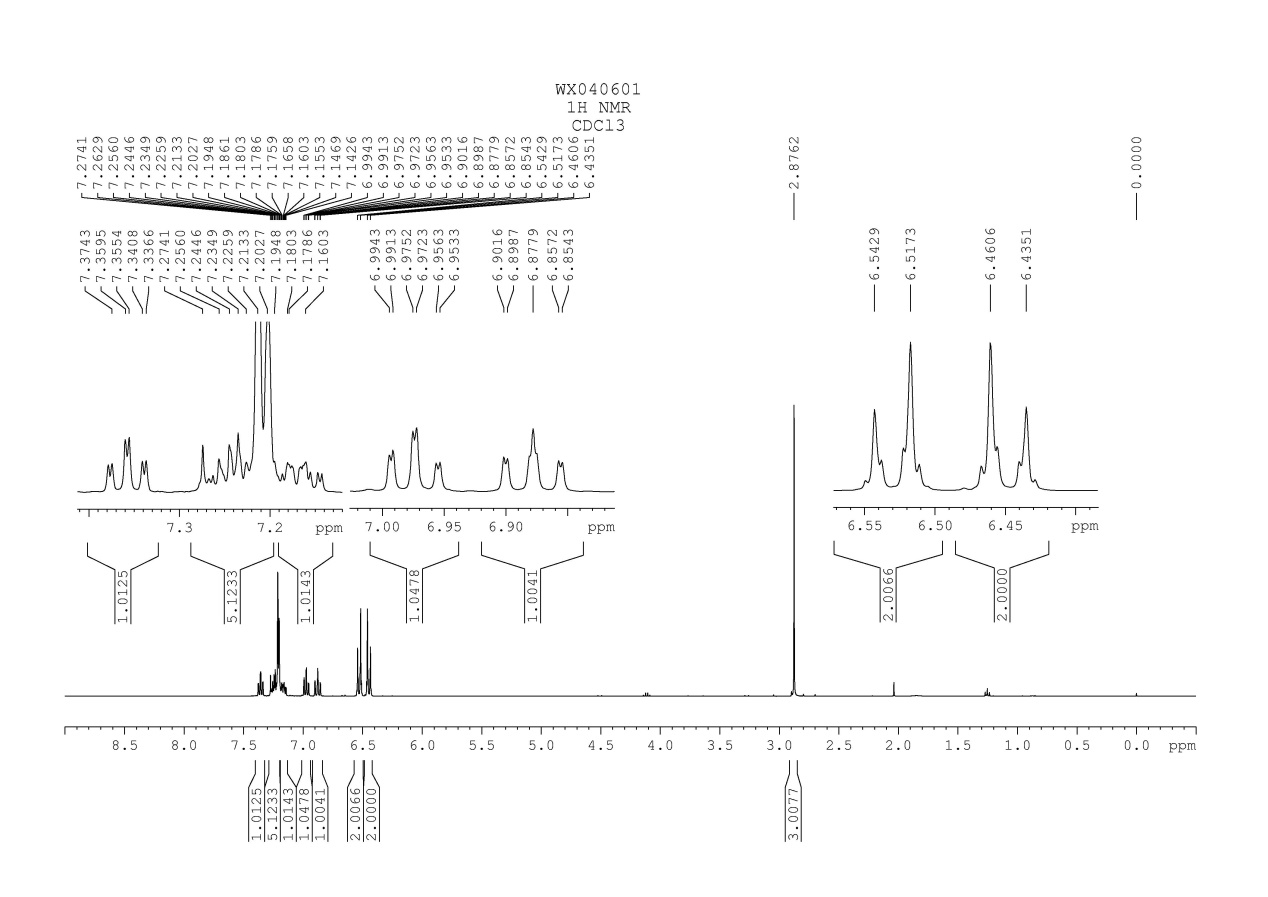
**

**Fig. 68** 1H NMR spectrum of compound **5d**

**
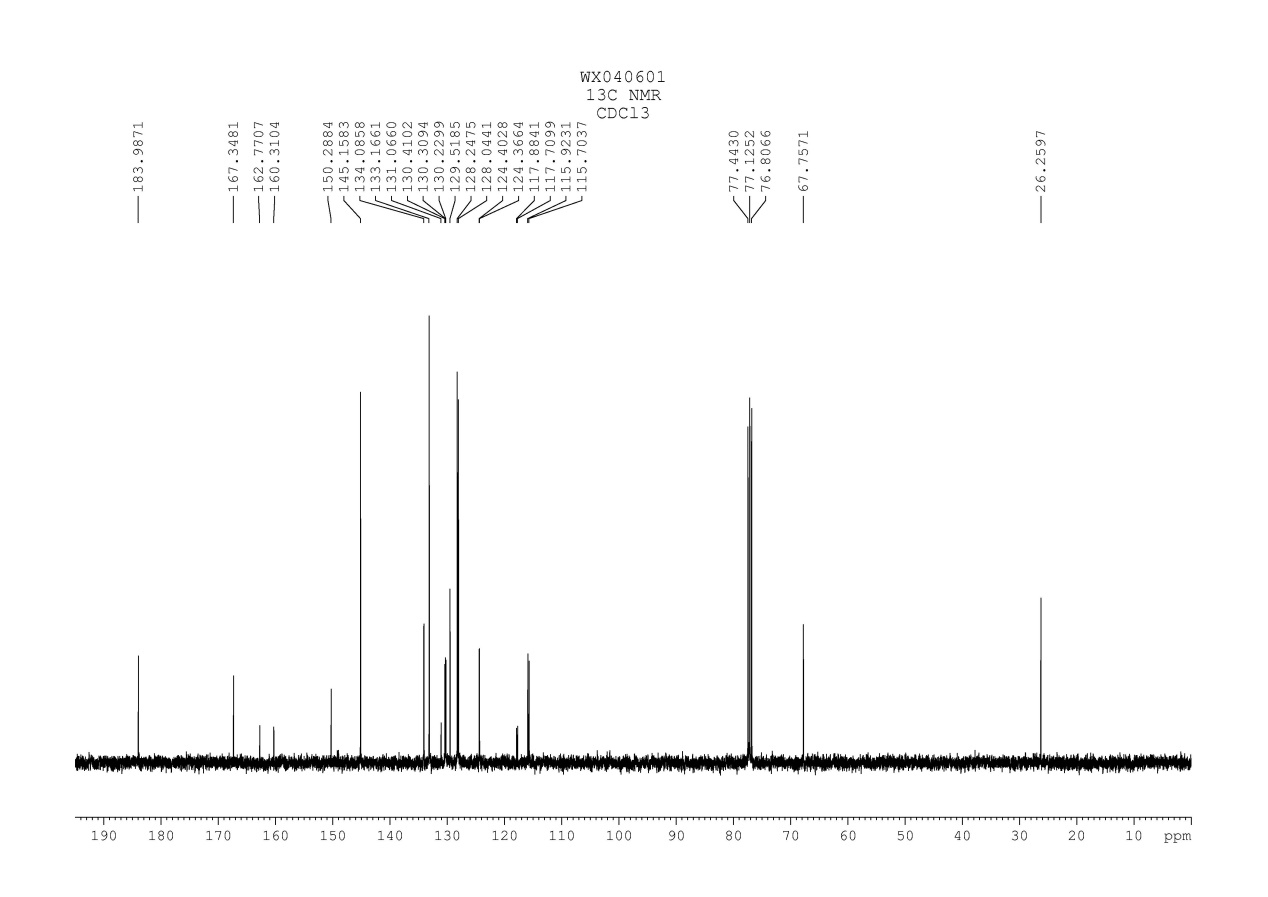
**

**Fig. 69** 13C NMR spectrum of compound **5d**

**
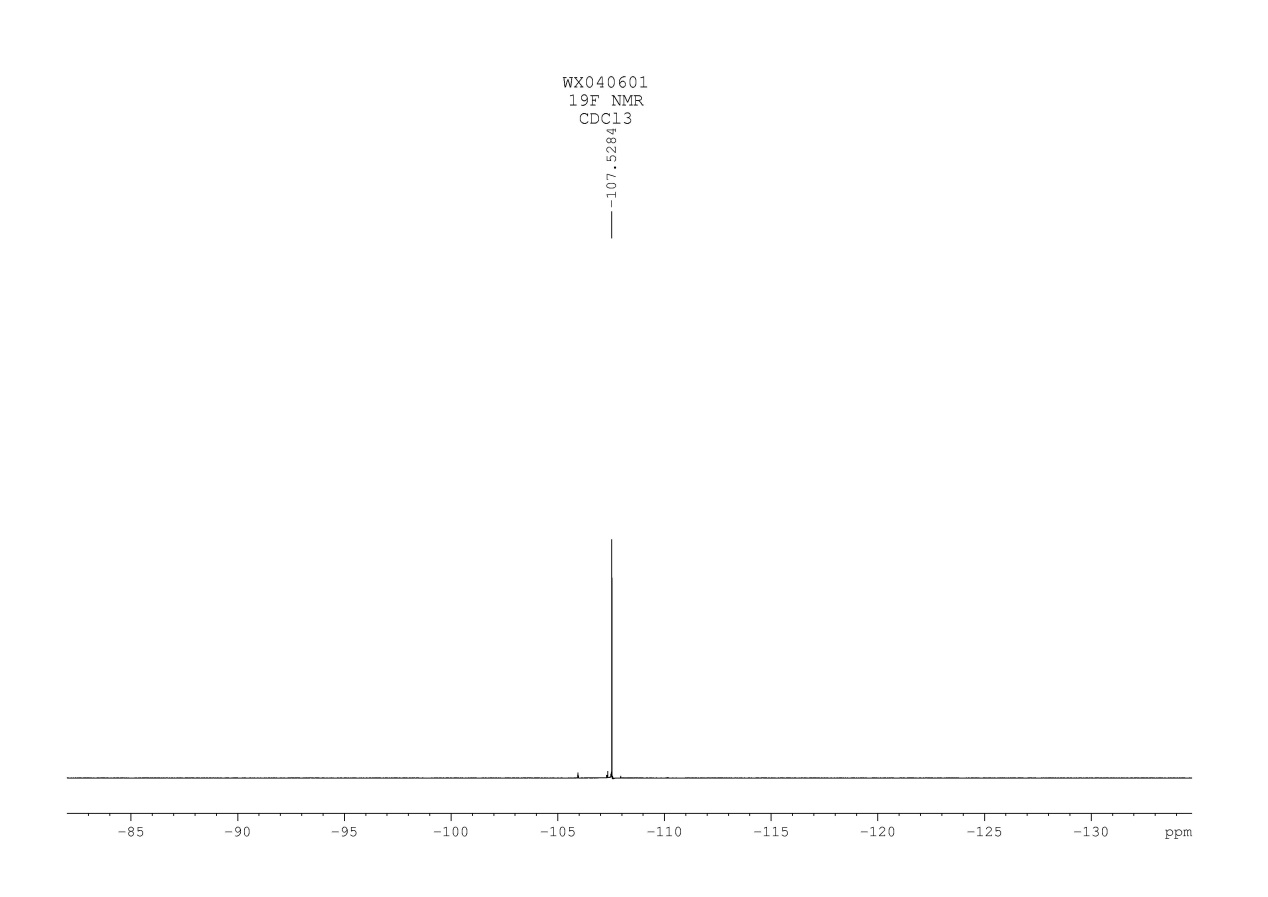
**

**Fig. 70** 19F NMR spectrum of compound **5d**

**
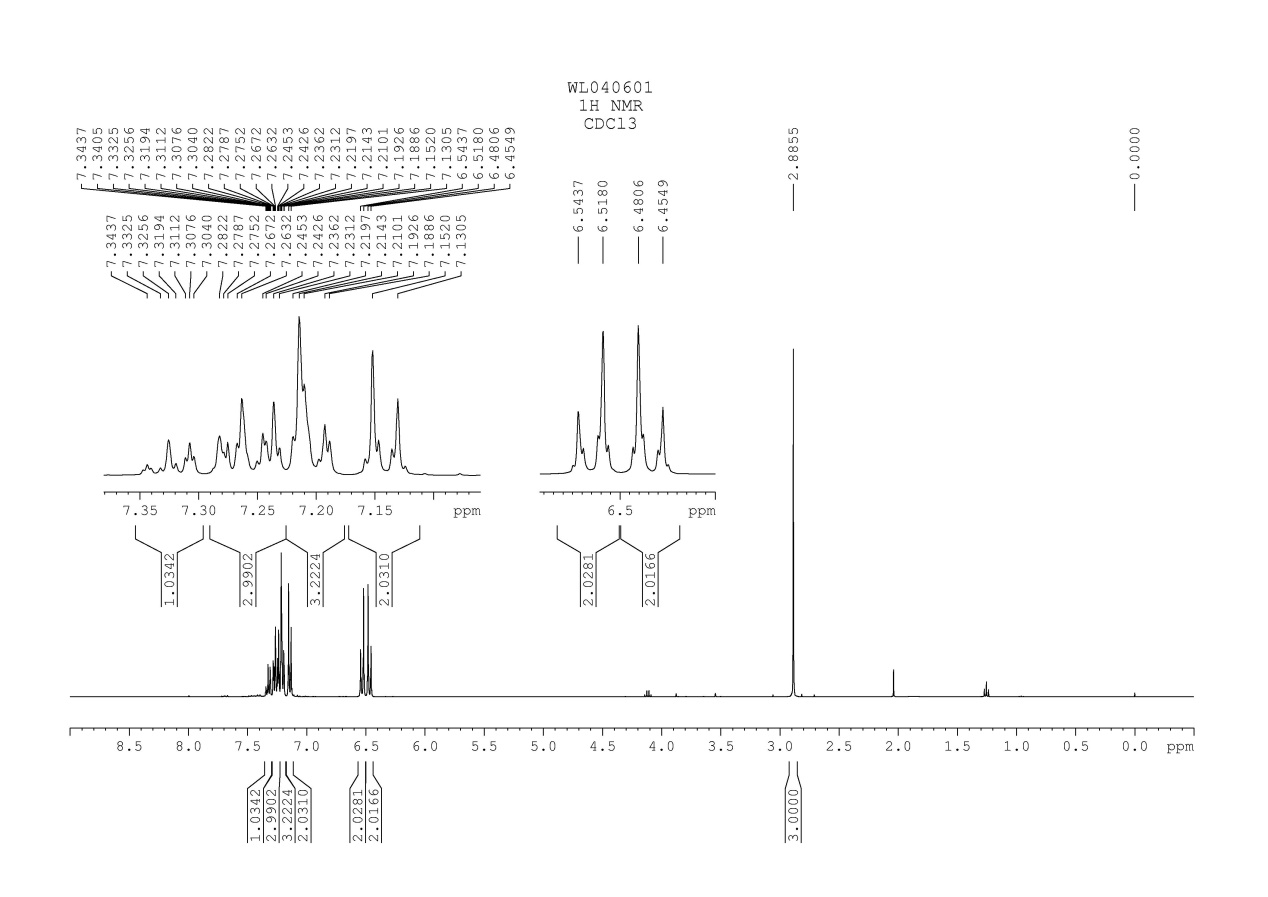
**

**Fig. 71** 1H NMR spectrum of compound **5e**

**
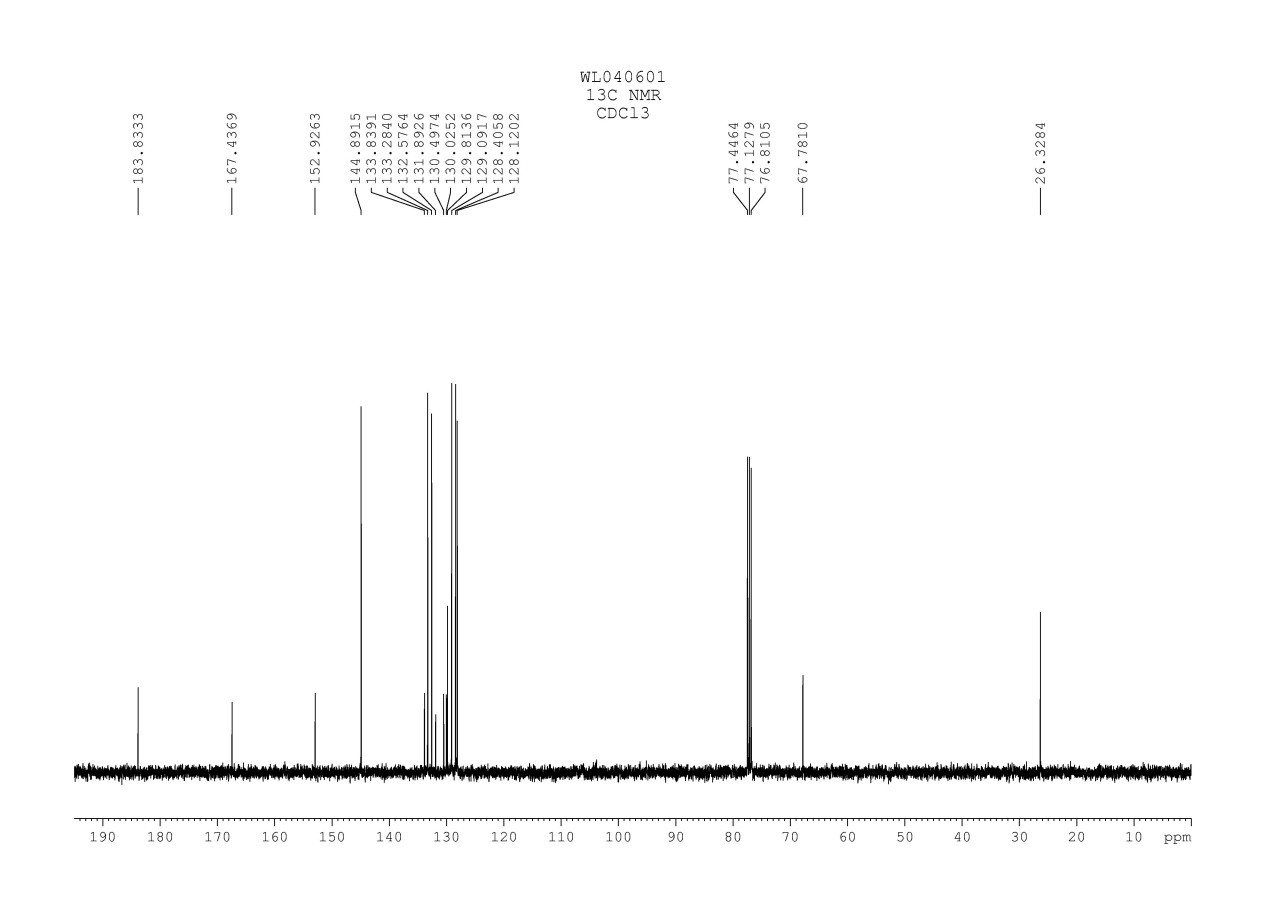
**

**Fig. 72** 13C NMR spectrum of compound **5e**

**
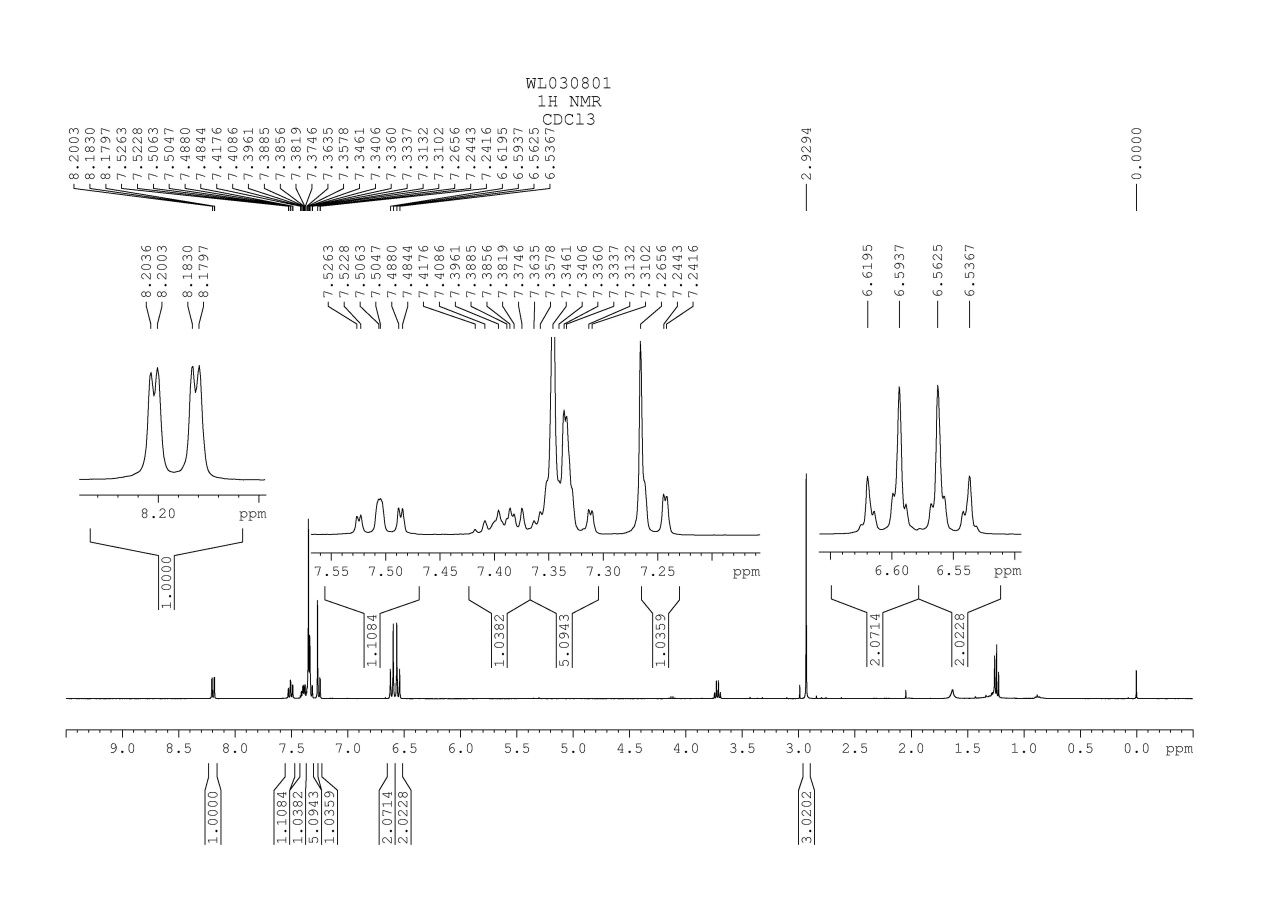
**

**Fig. 73** 1H NMR spectrum of compound **5f**

**
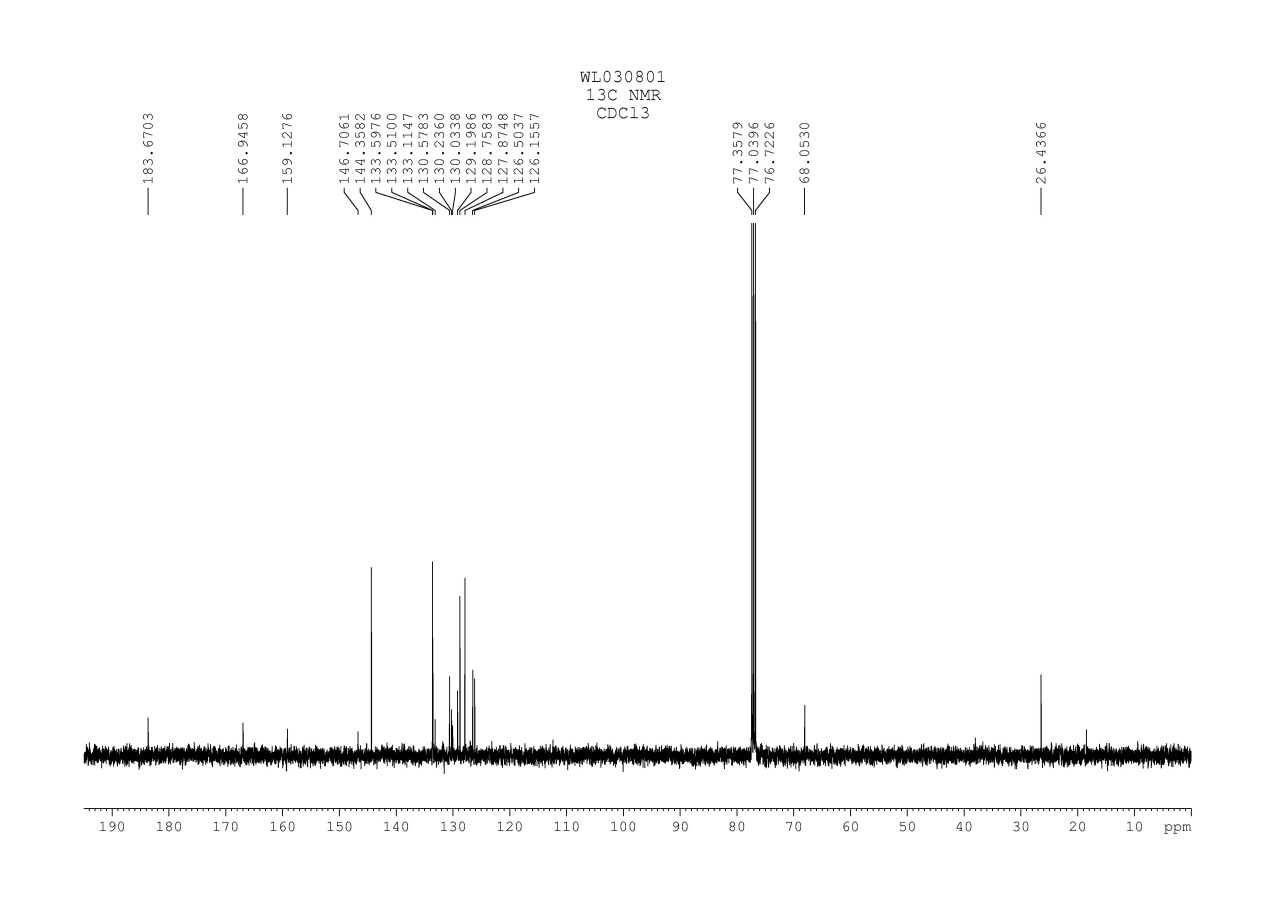
**

**Fig. 74** 13C NMR spectrum of compound **5f**

**
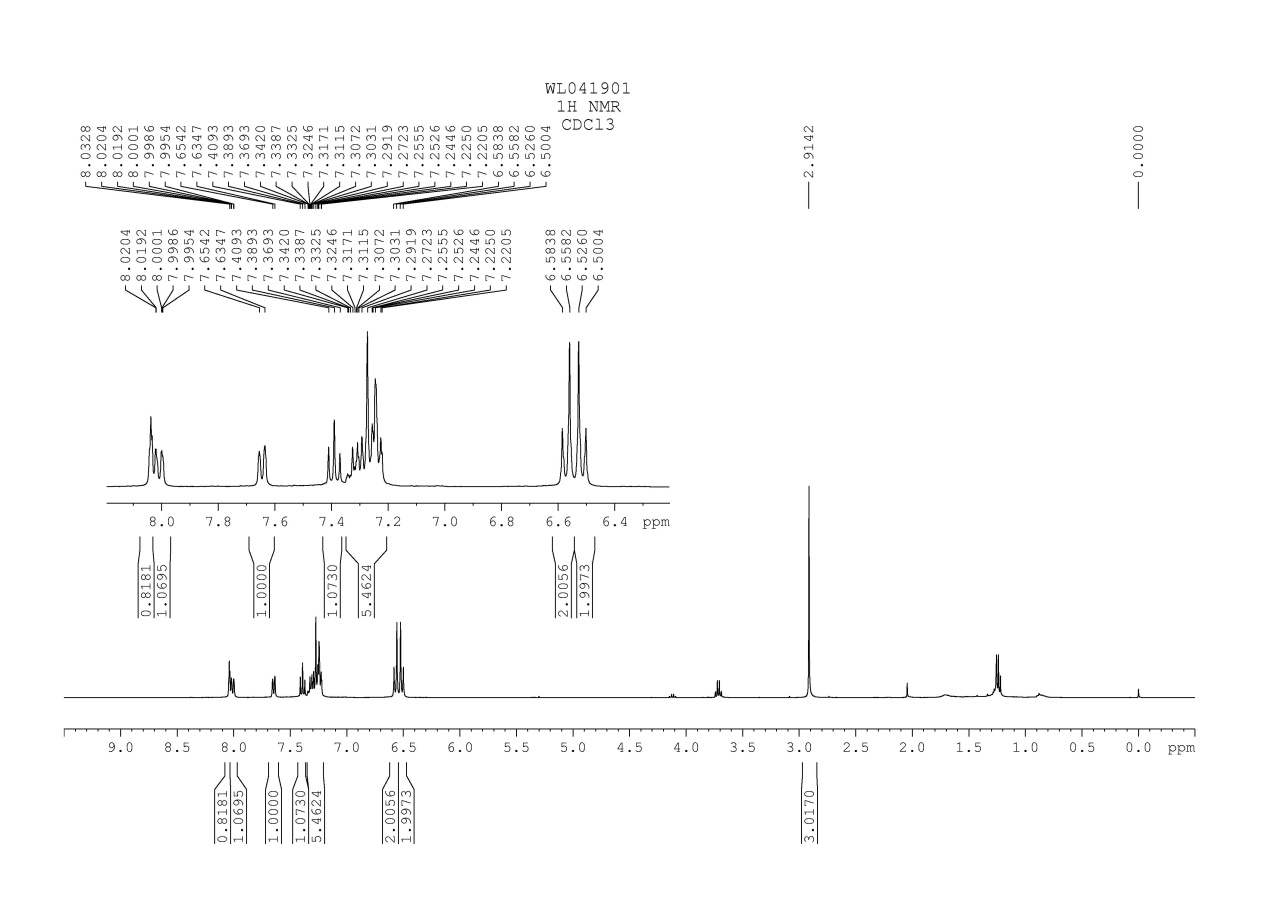
**

**Fig. 75** 1H NMR spectrum of compound **5g**

**
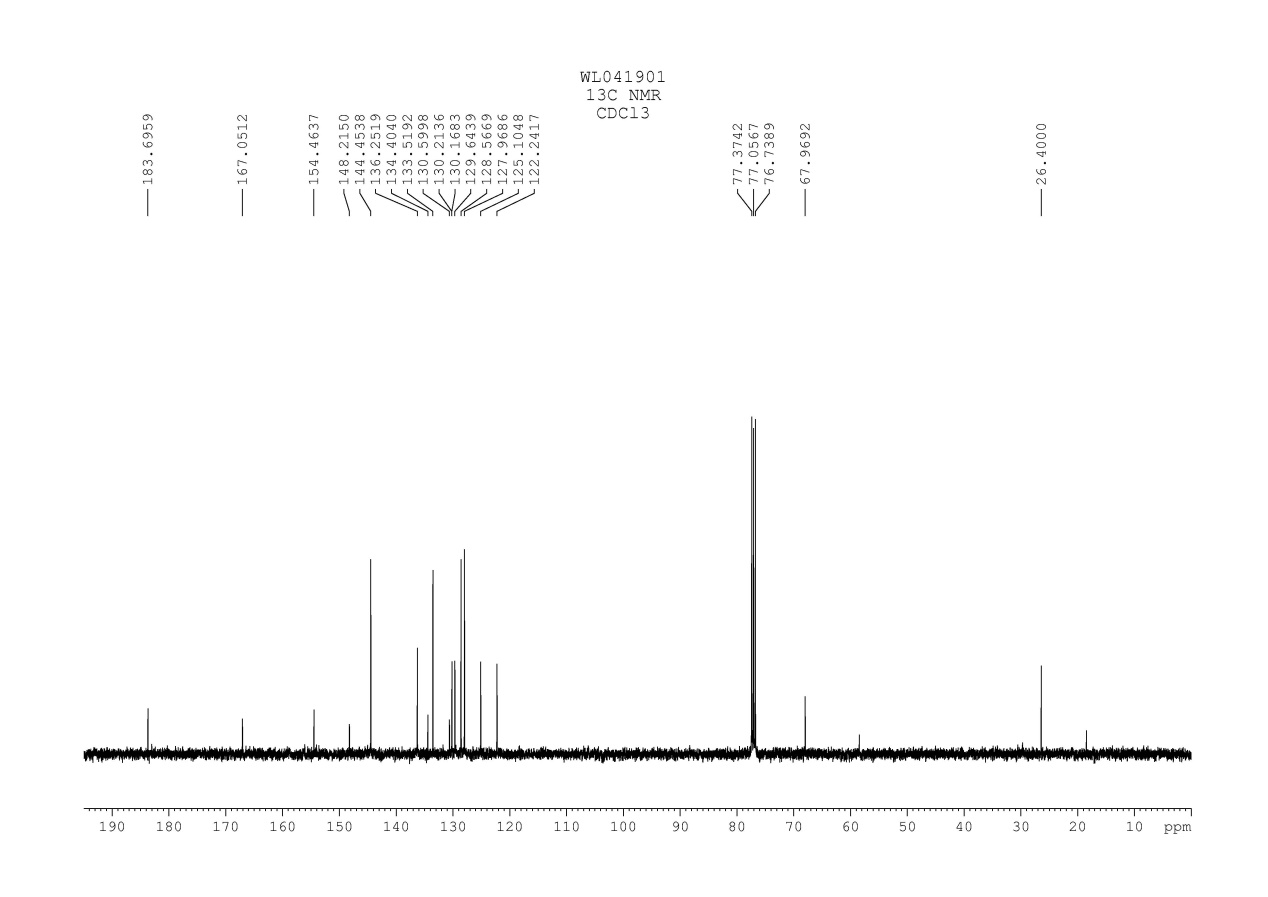
**

**Fig. 76** 13C NMR spectrum of compound **5g**

**
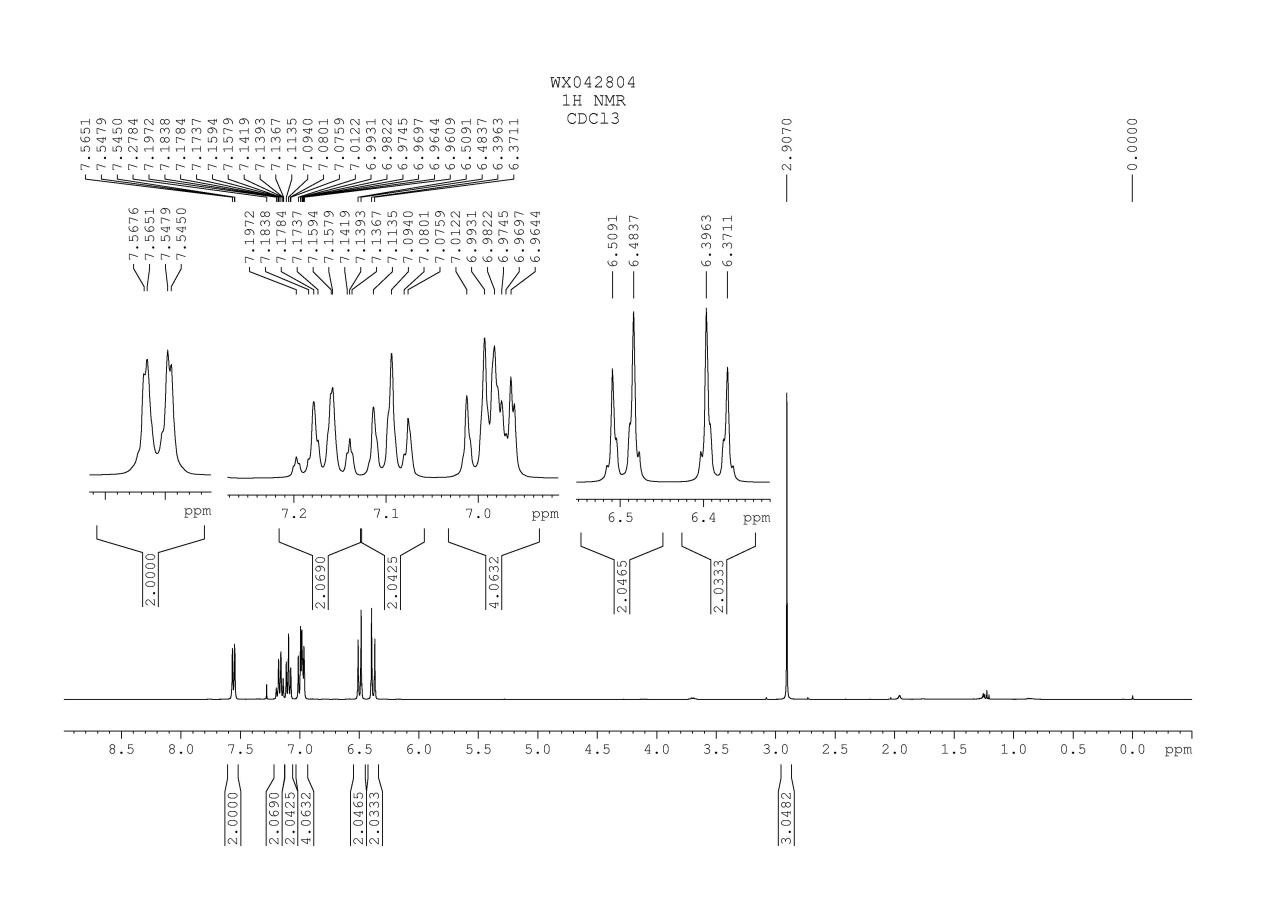
**

**Fig. 77** 1H NMR spectrum of compound **5h**

**
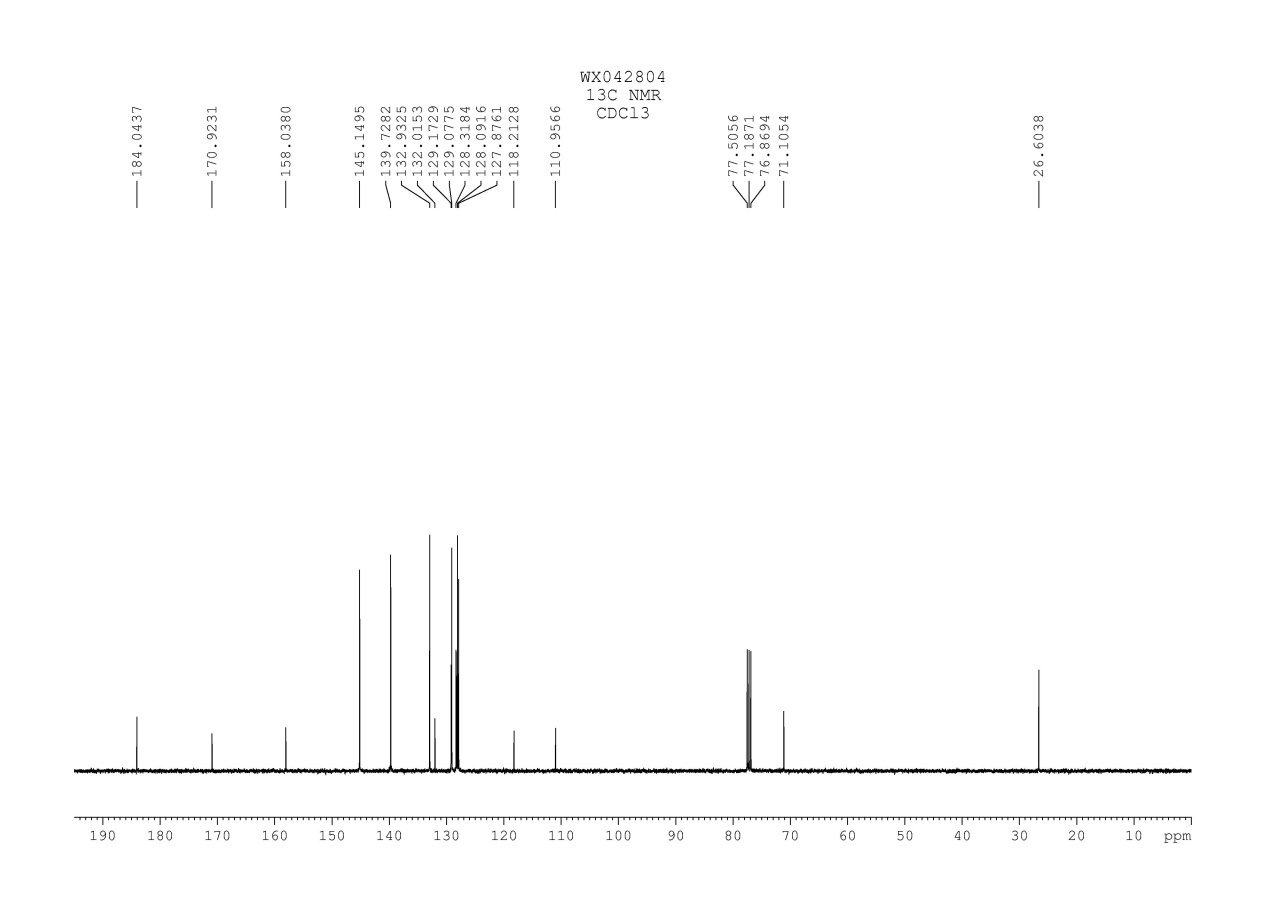
**

**Fig. 78** 13C NMR spectrum of compound **5h**

# 5. Intermolecular competition experiment

*N*-(4-Methoxyphenyl)-*N*-methyl-3-phenylpropiolamide **1a** (0.2 mmol, 53.0 mg), diphenyl diselenide **2a** (0.1 mmol, 31.4 mg), diphenyl disulfides **4a** (0.1 mmol, 21.8 mg), Selectfluor agent (0.2 mmol, 70.8 mg), and acetonitrile (2.0 mL) were added to a 10 mL reaction tube. The mixture was stirred at 40 oC for 1.5 h. After completion of the reaction, the solvent was distilled under vacuum. Then, the resulting mixture was dissolved with ethyl acetate (15 mL).

The yields of **3a** and **5a** were analyzed by HPLC.


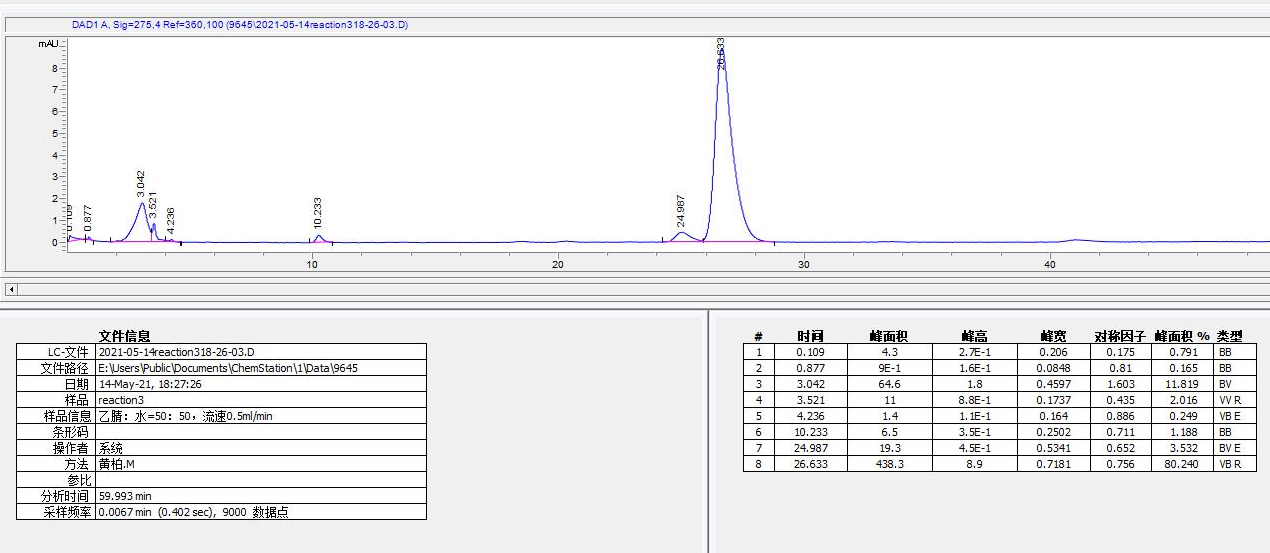


**3a**

**5a**
